# Supplementary material for: SwitchFinder – a novel method and query facility for discovering dynamic gene expression patterns
Source: PubMed Central journal article supplement (PMC5160026; doi:10.1186/s12859-016-1391-0), 2016-12-15

# BRCA1

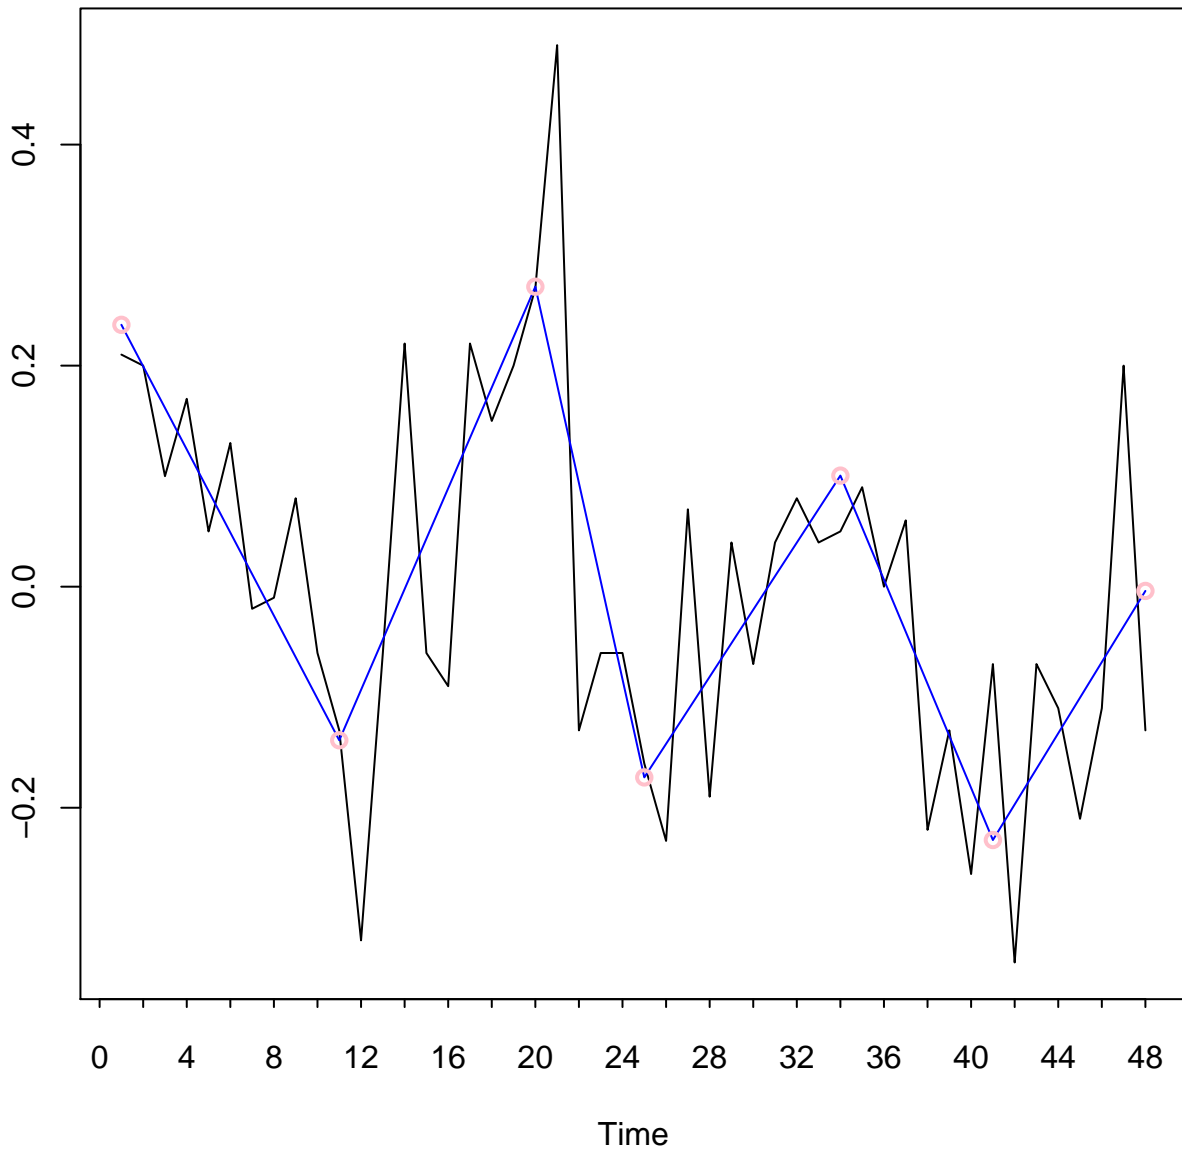

# CCNE1

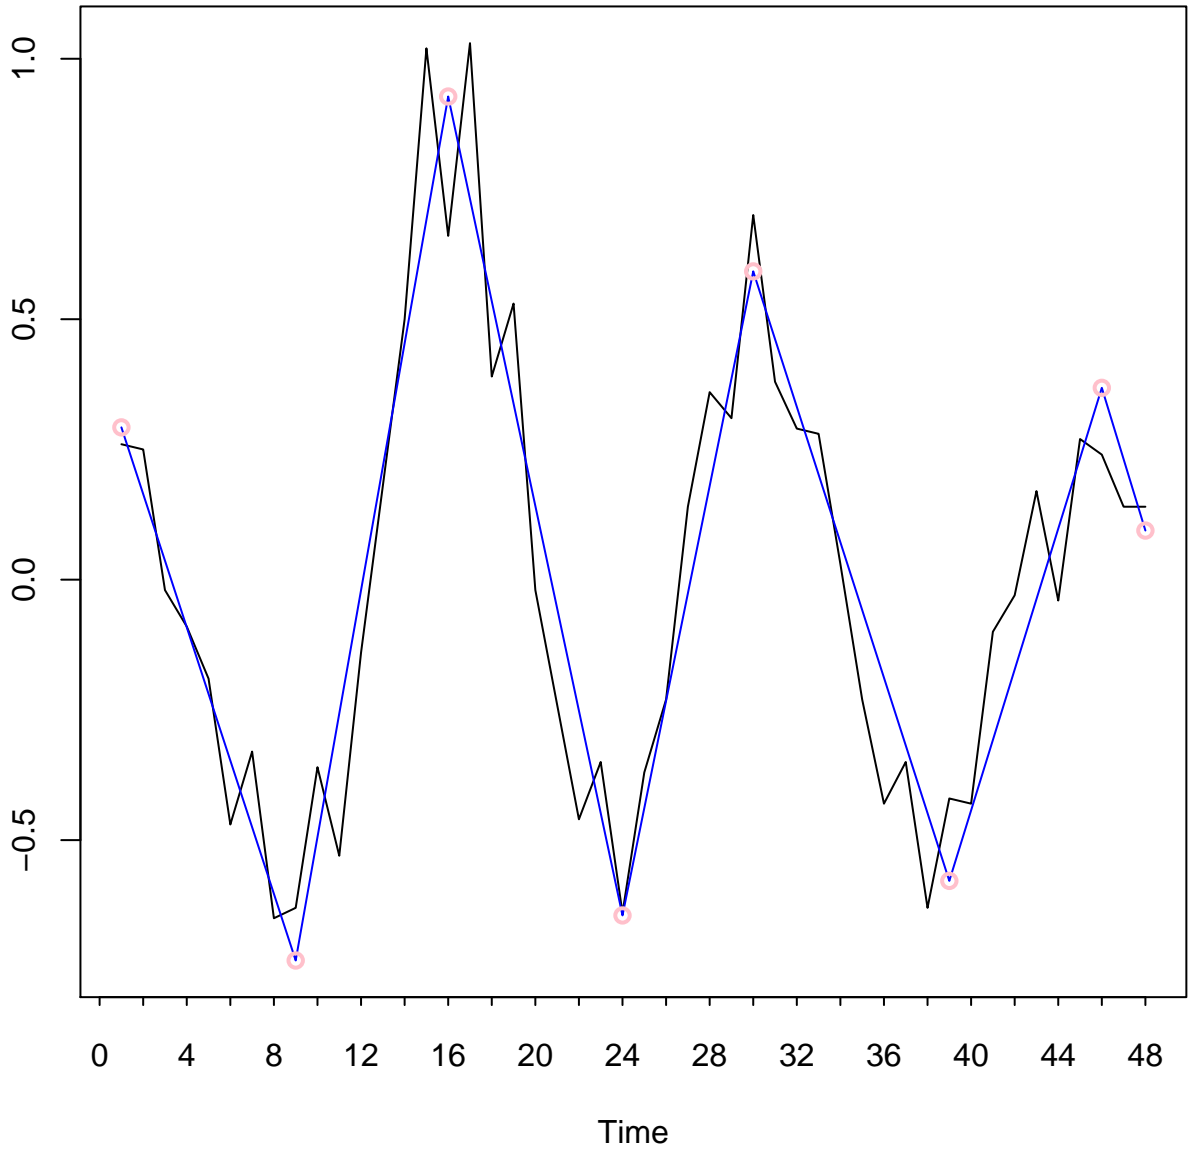

# DHFR\_AA489055

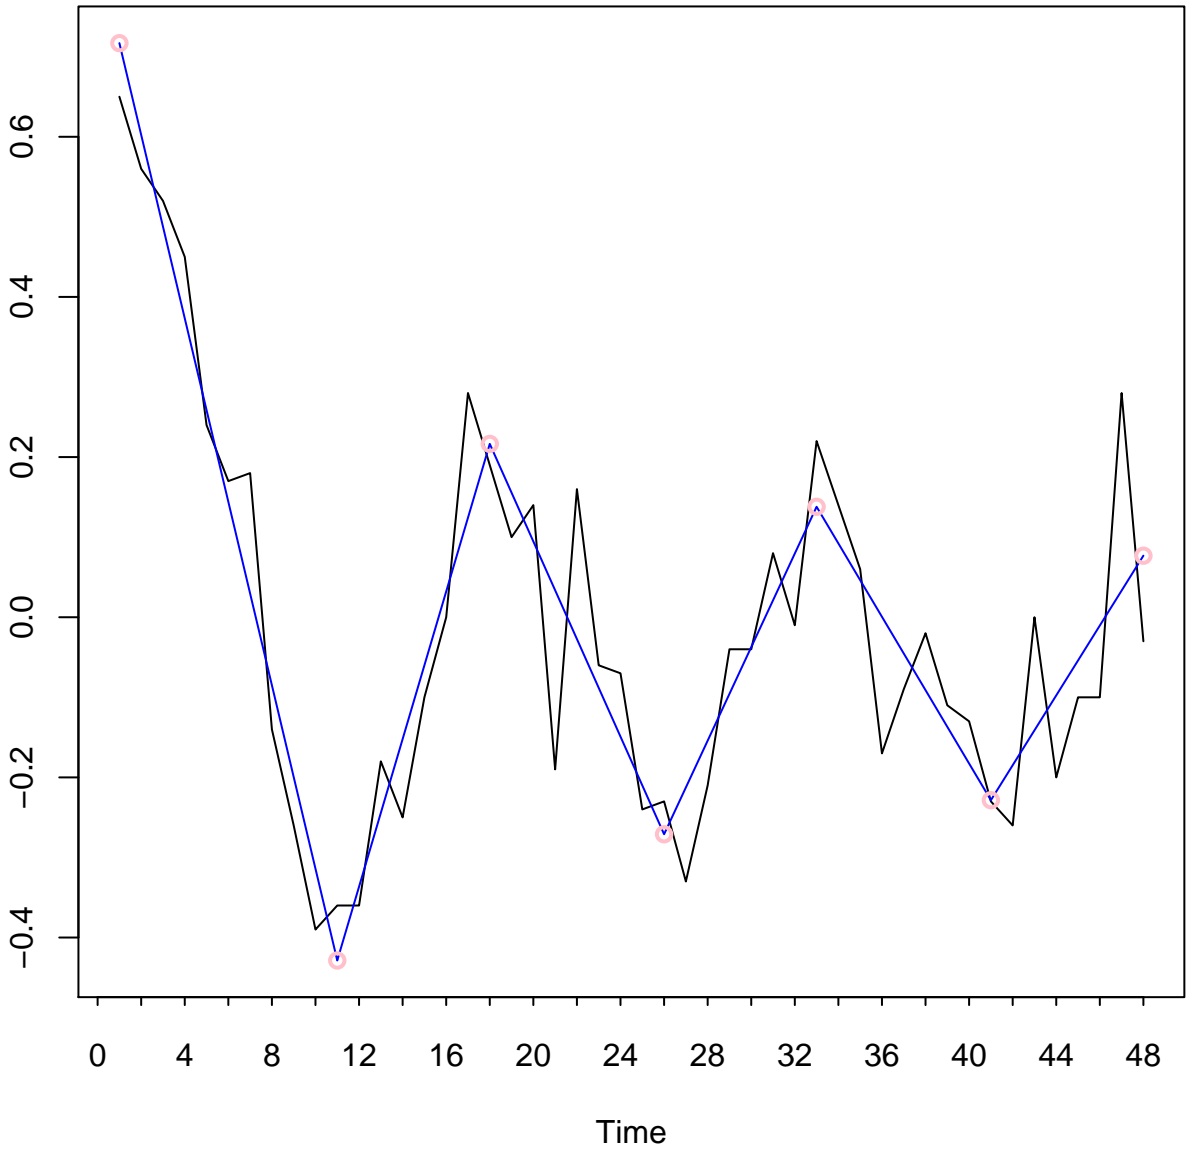

# DHFR\_R01547

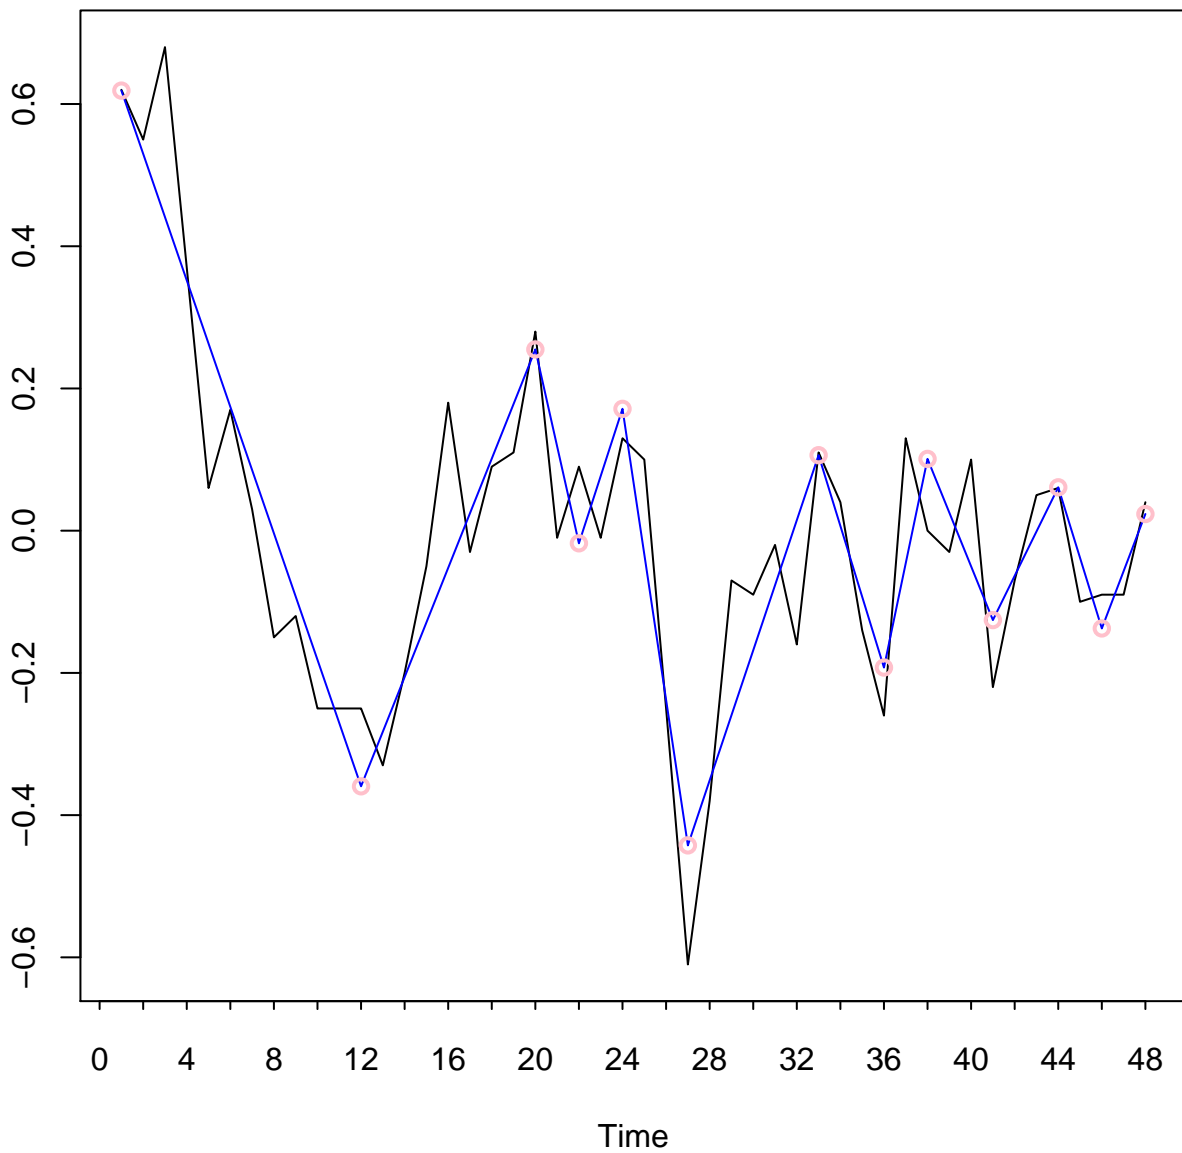

# E2F1\_H61303

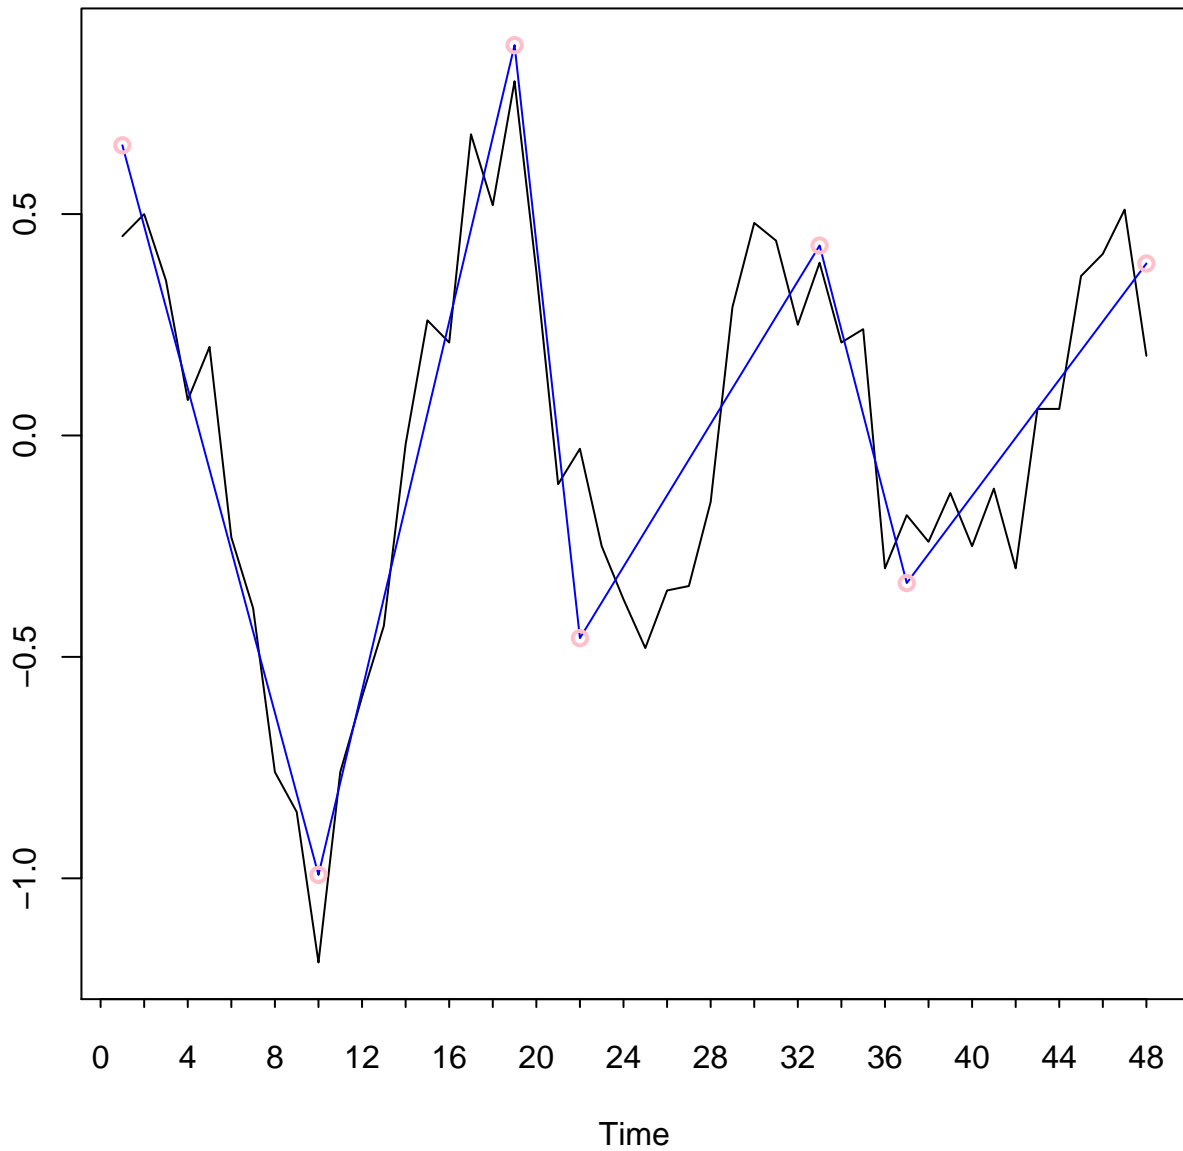

# PCNA\_H13004

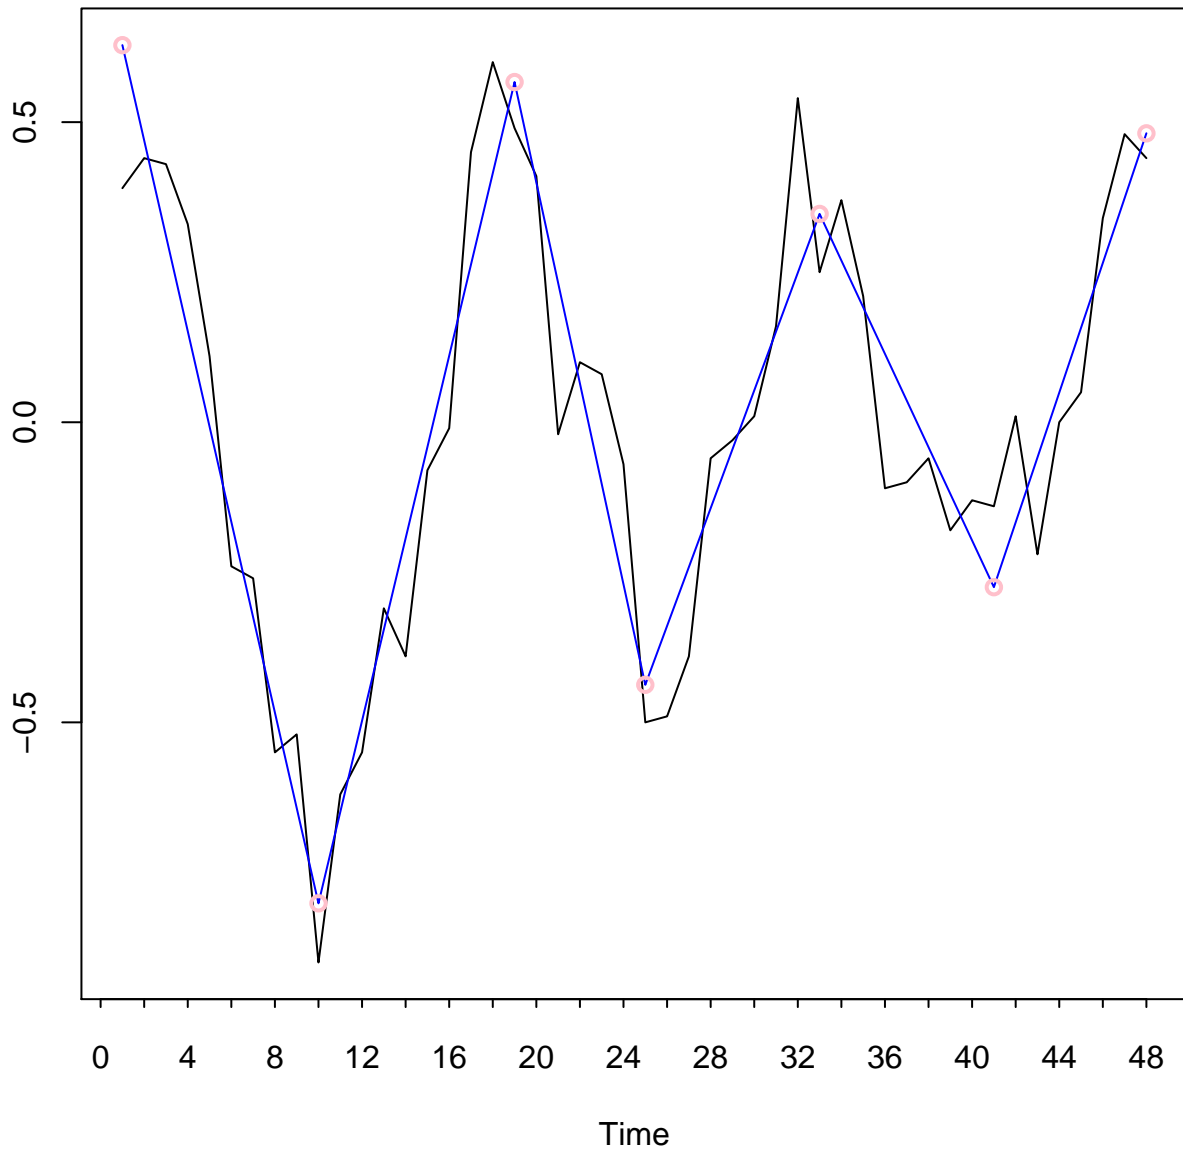

# RRM1

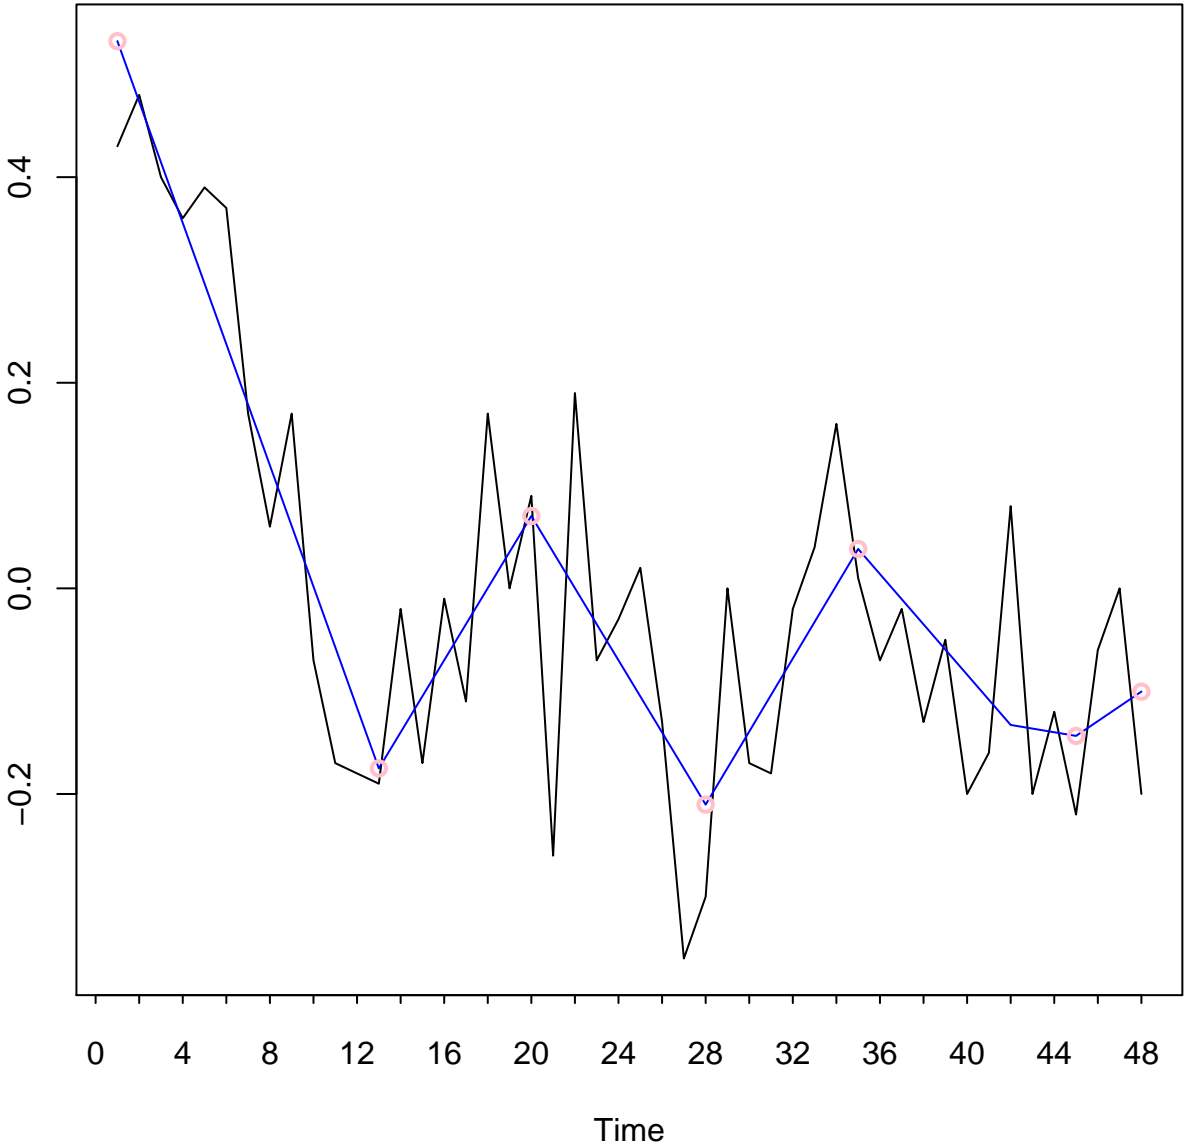

# CCNE2

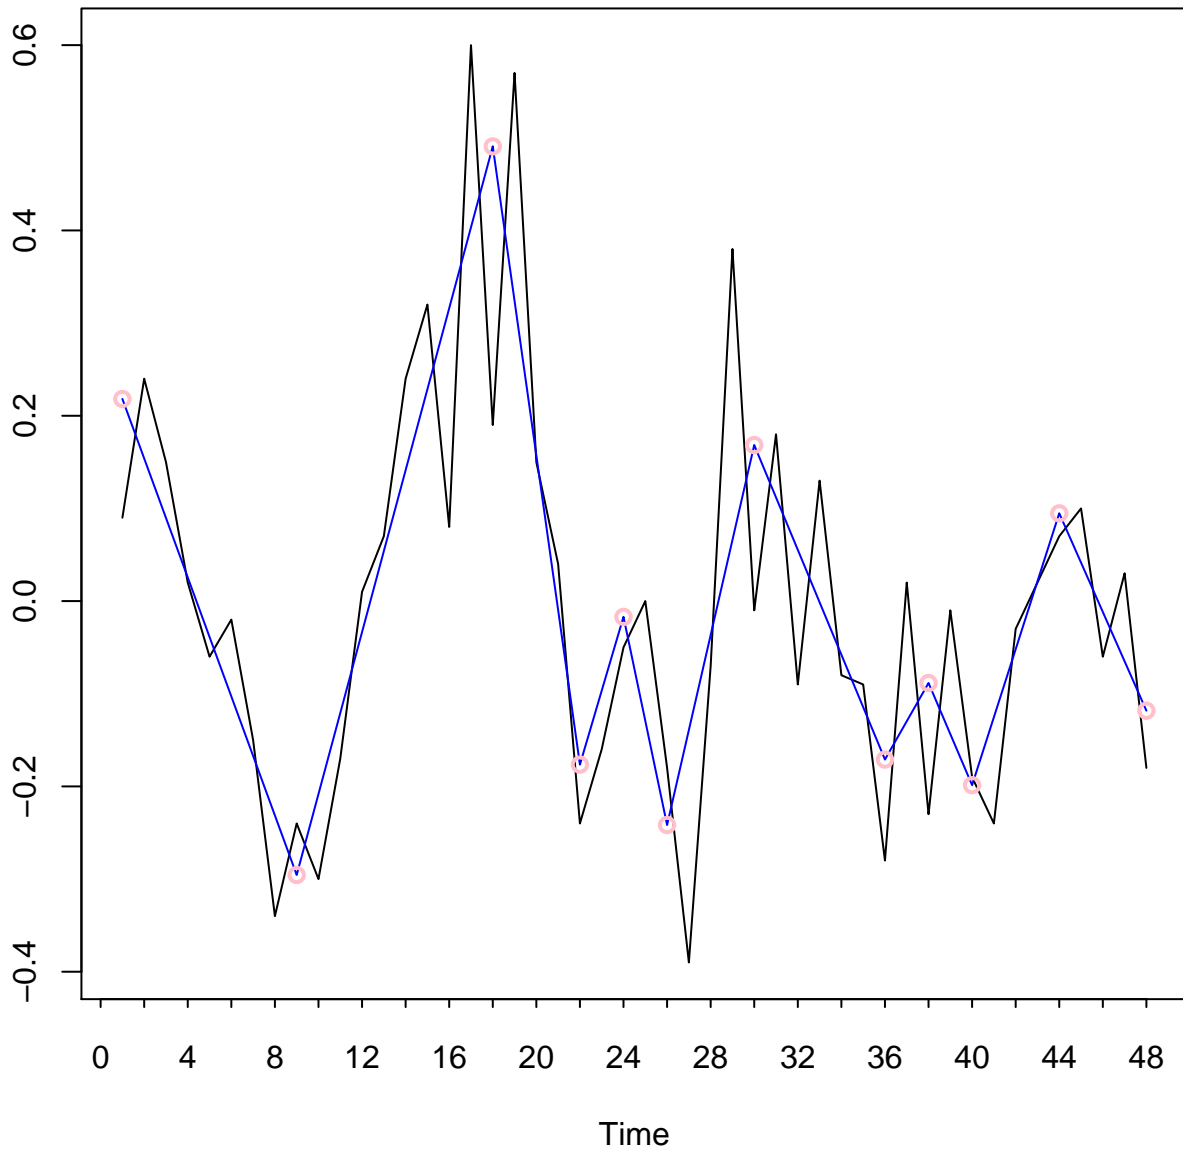



# CDC25A\_AA071514

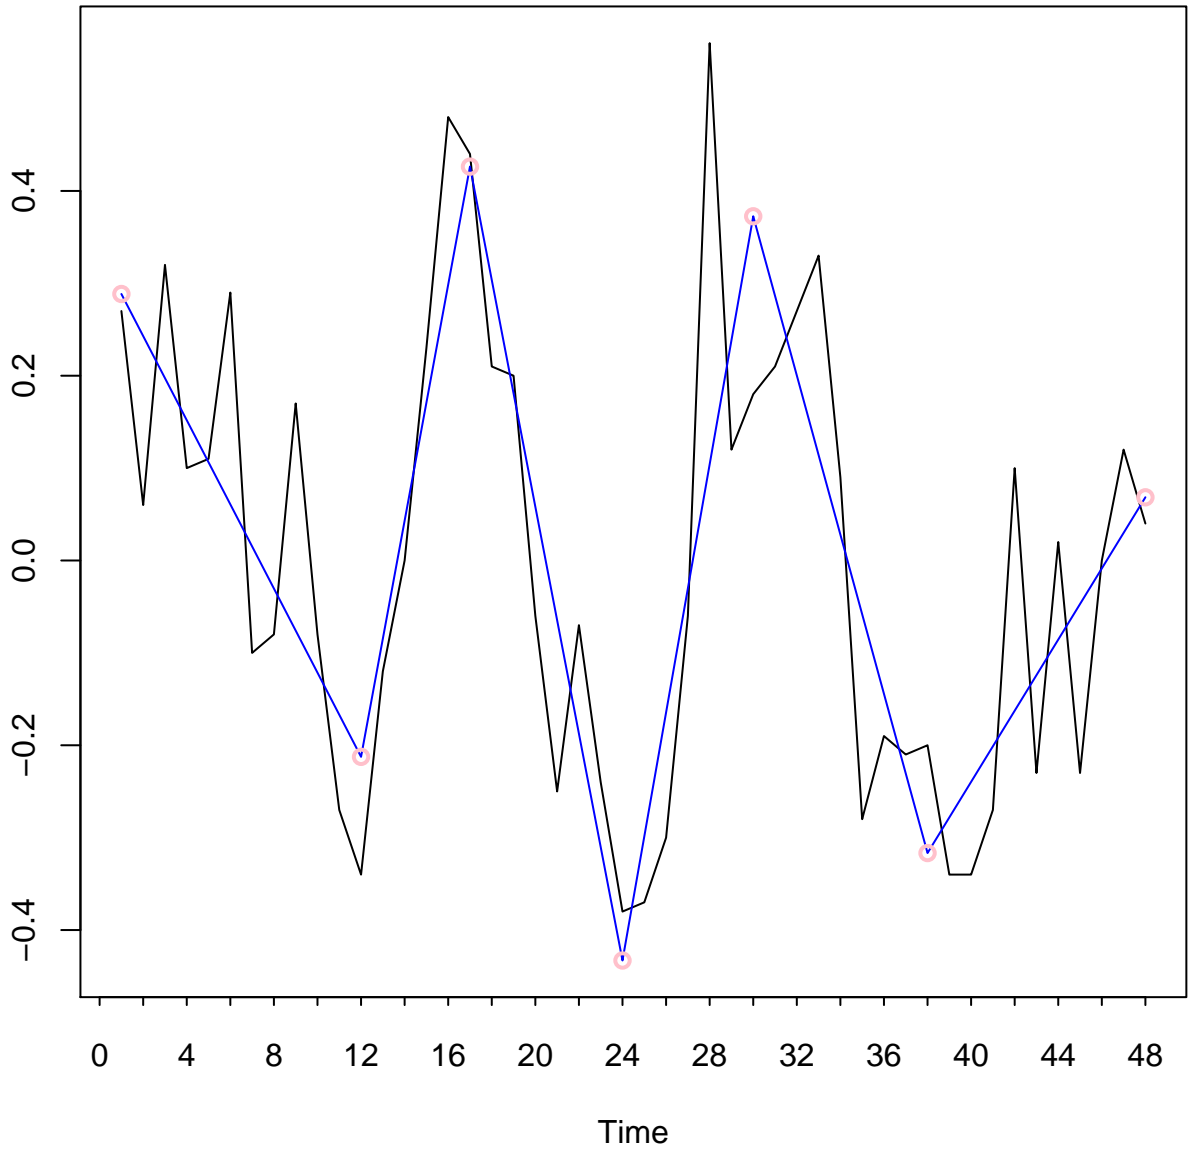

# CDC28/cdc2

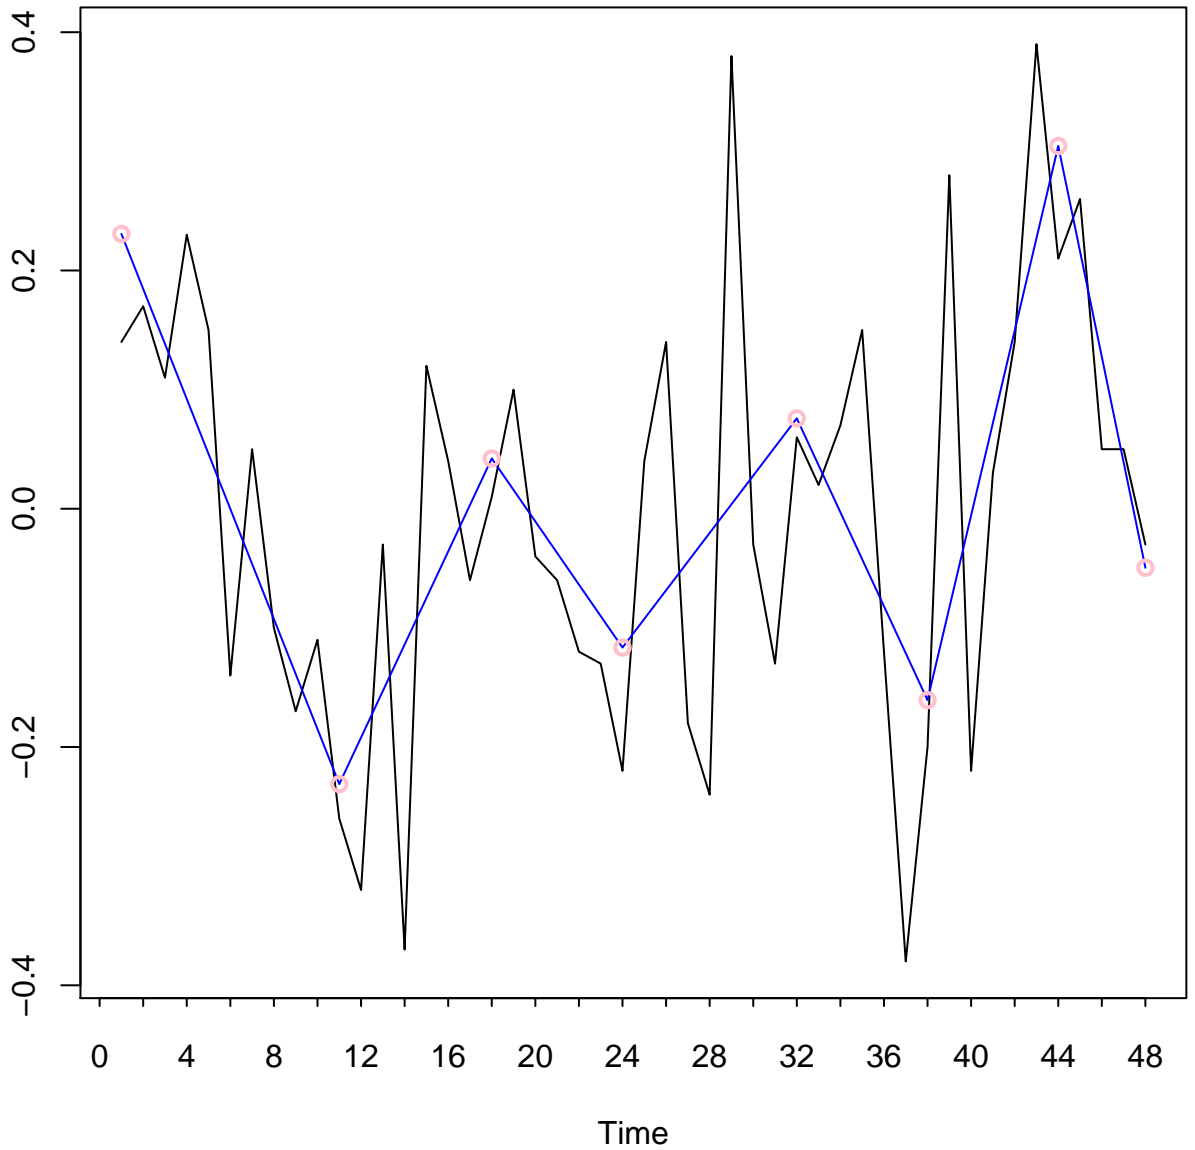

# CDC6

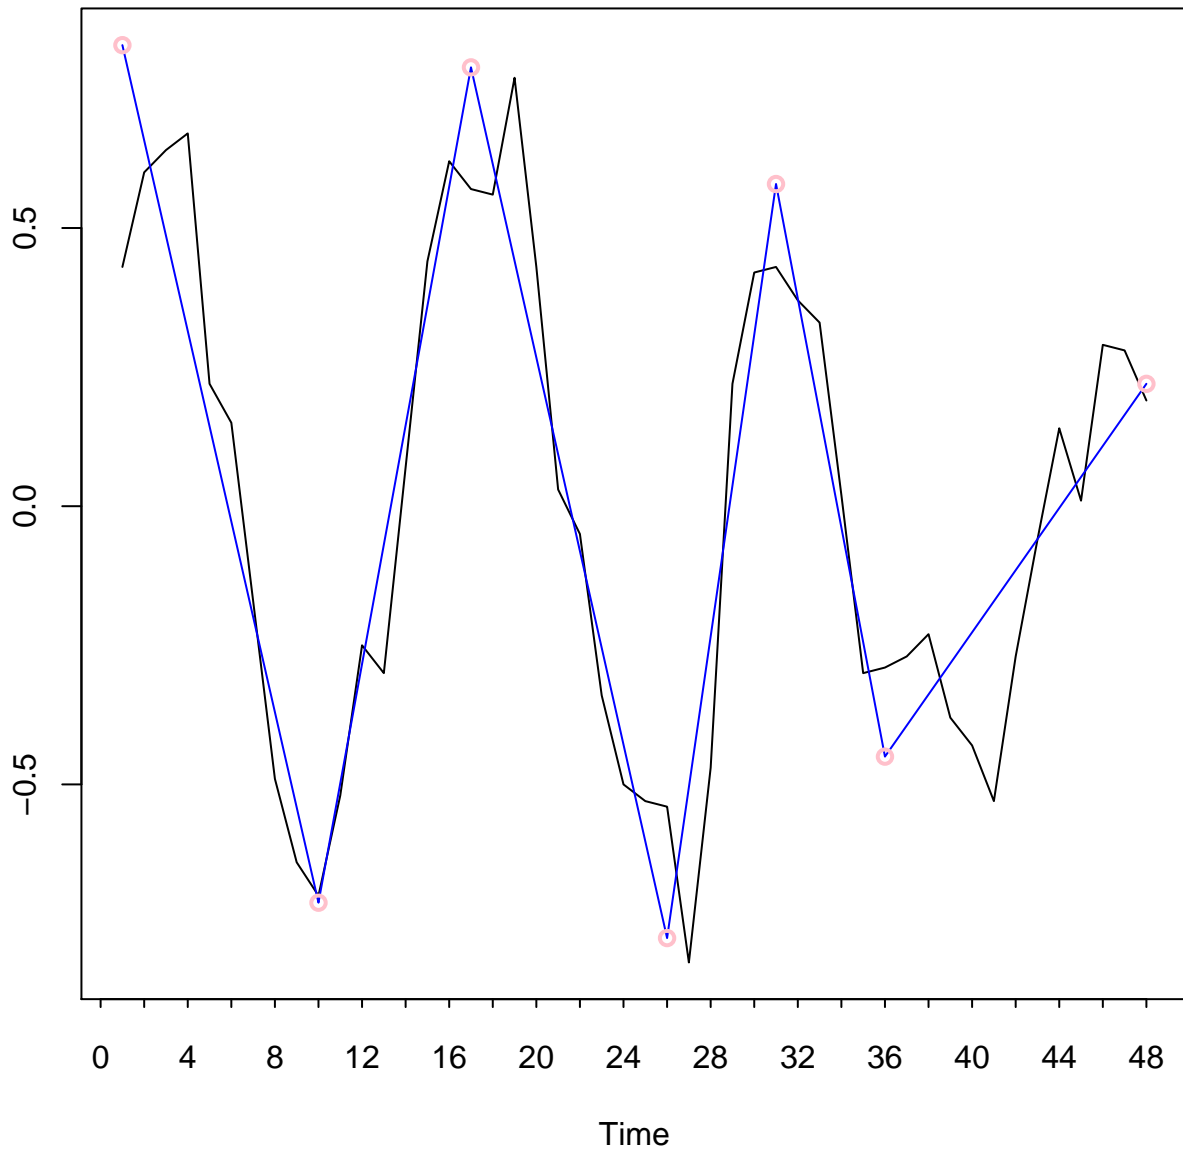

# DHFR\_N52980

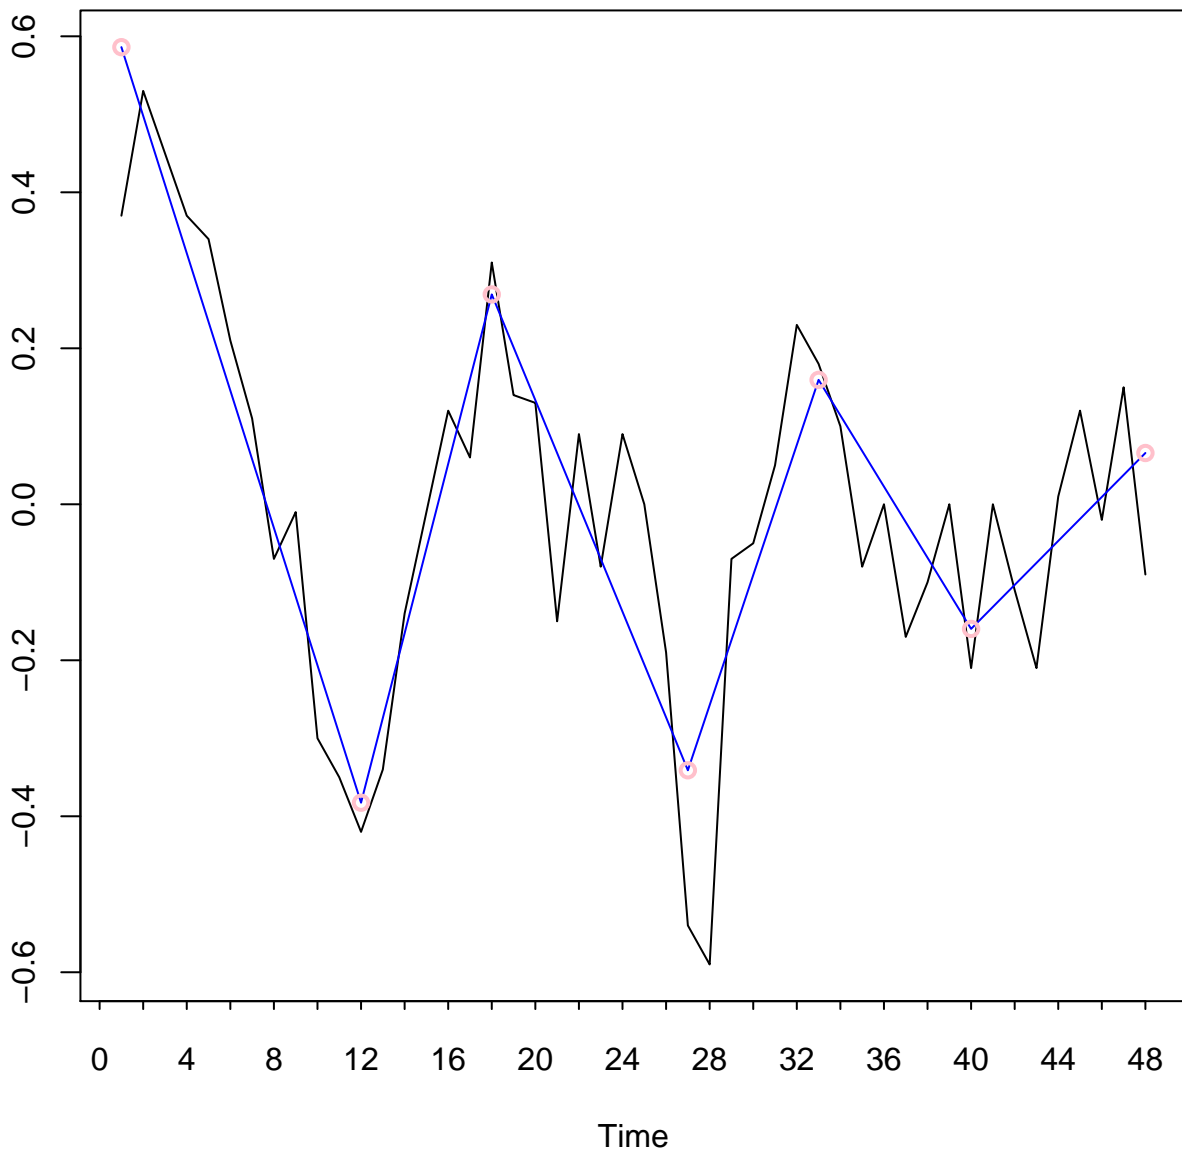

# DMTF1

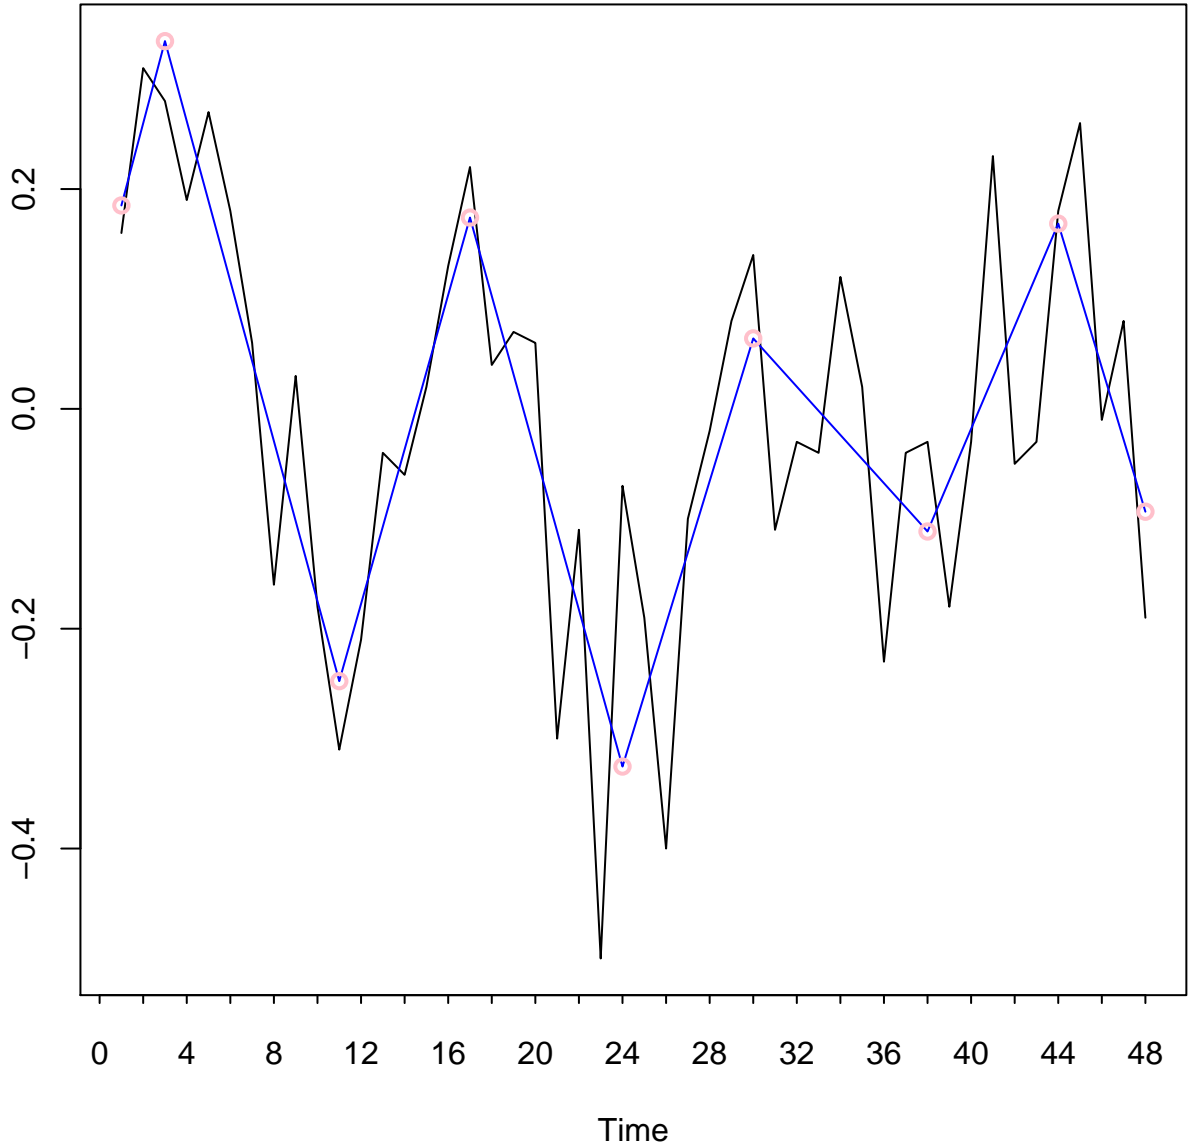

# E2F1\_AA424950

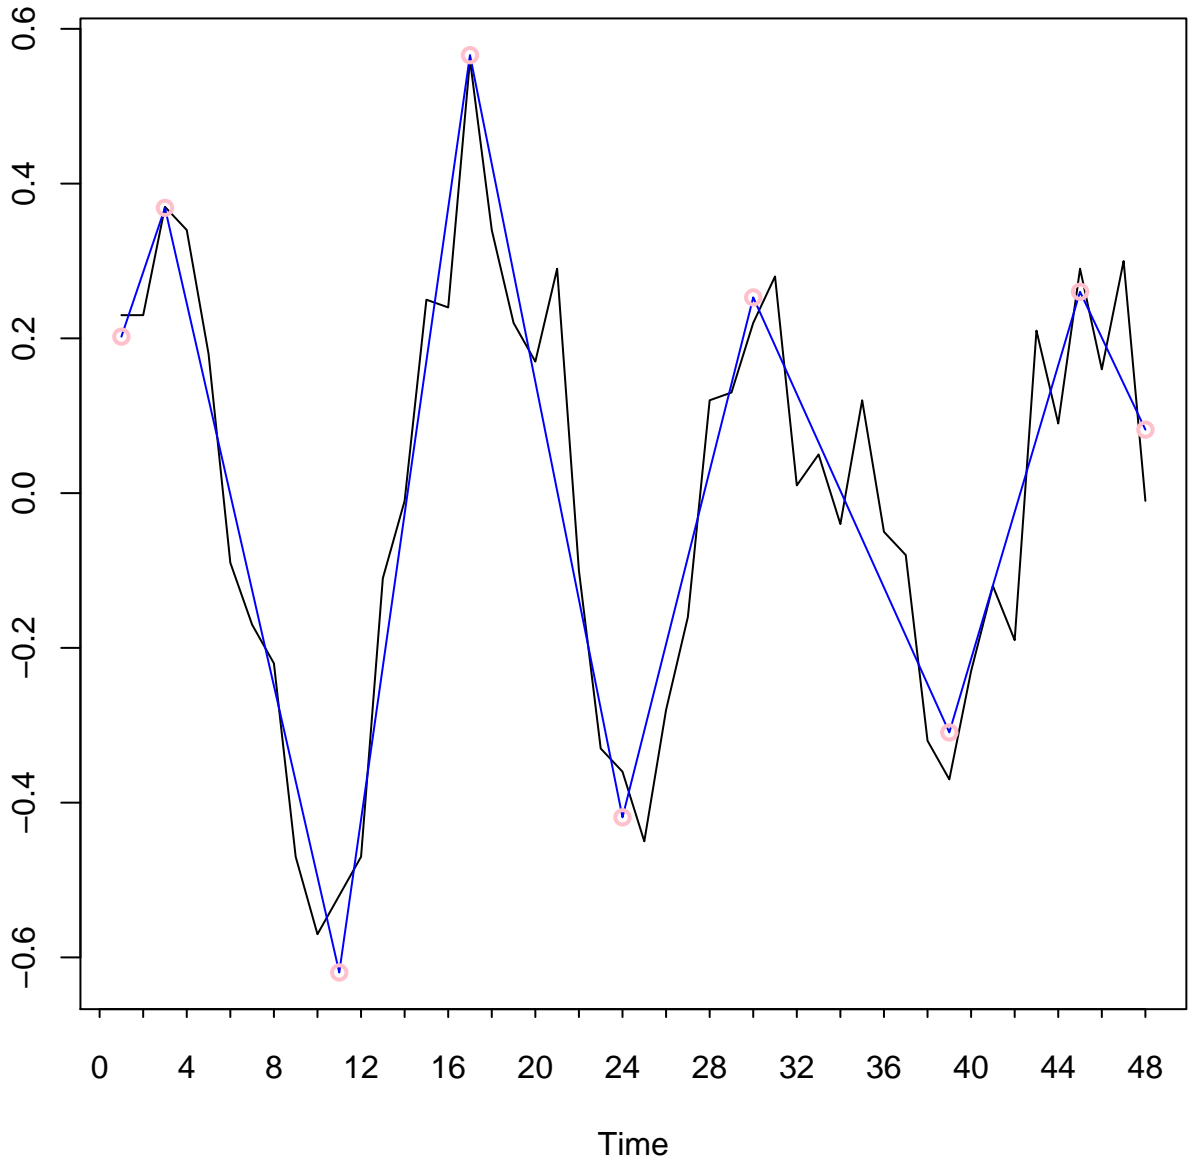

# HDAC3\_AA973283

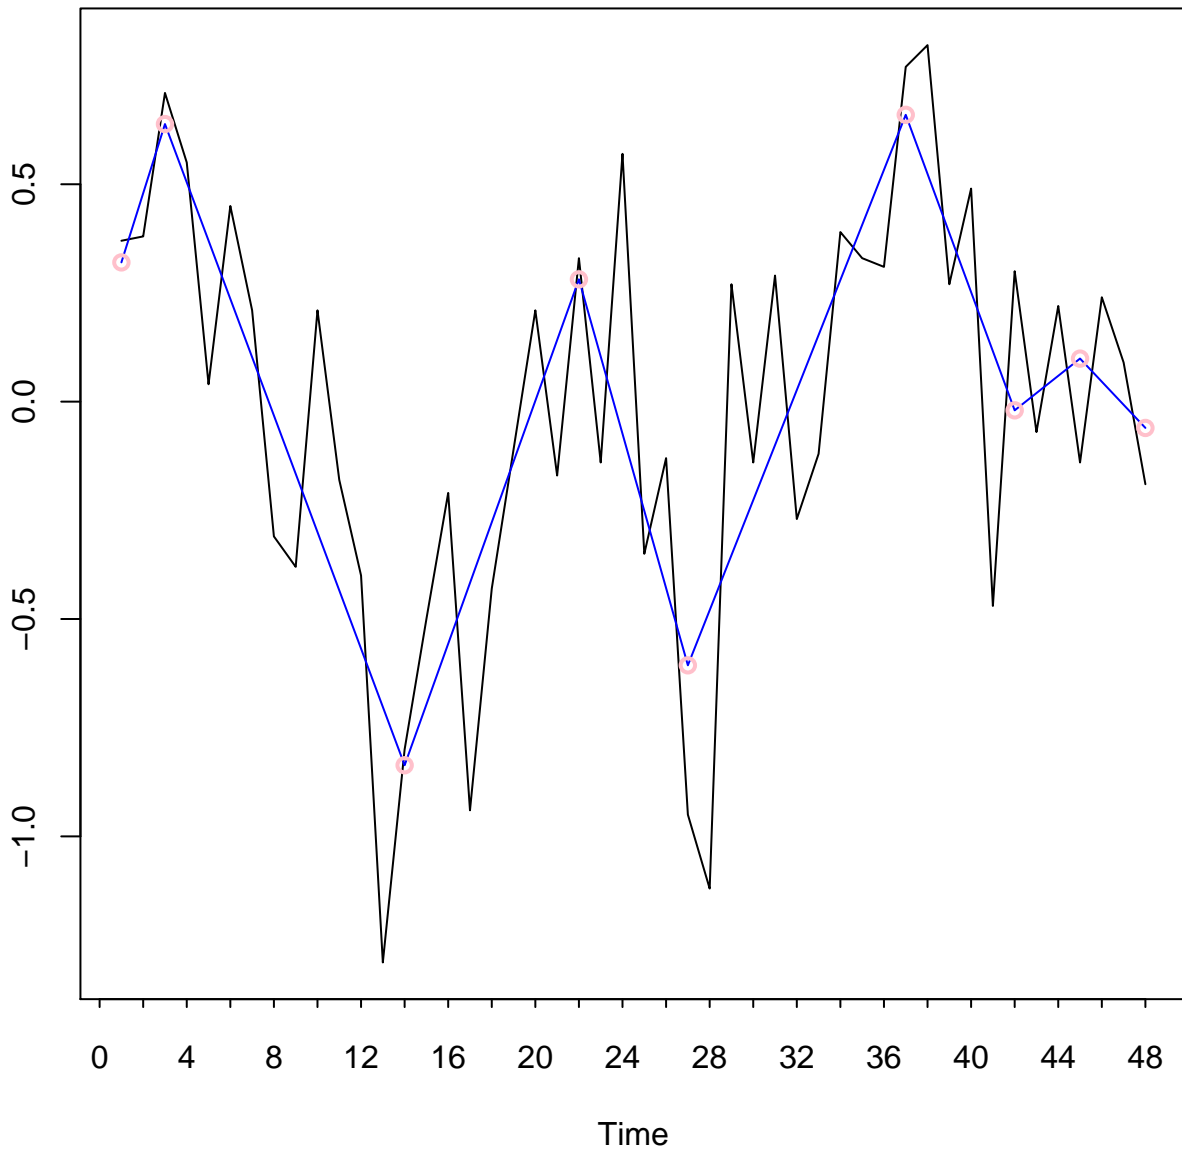

# MCM2

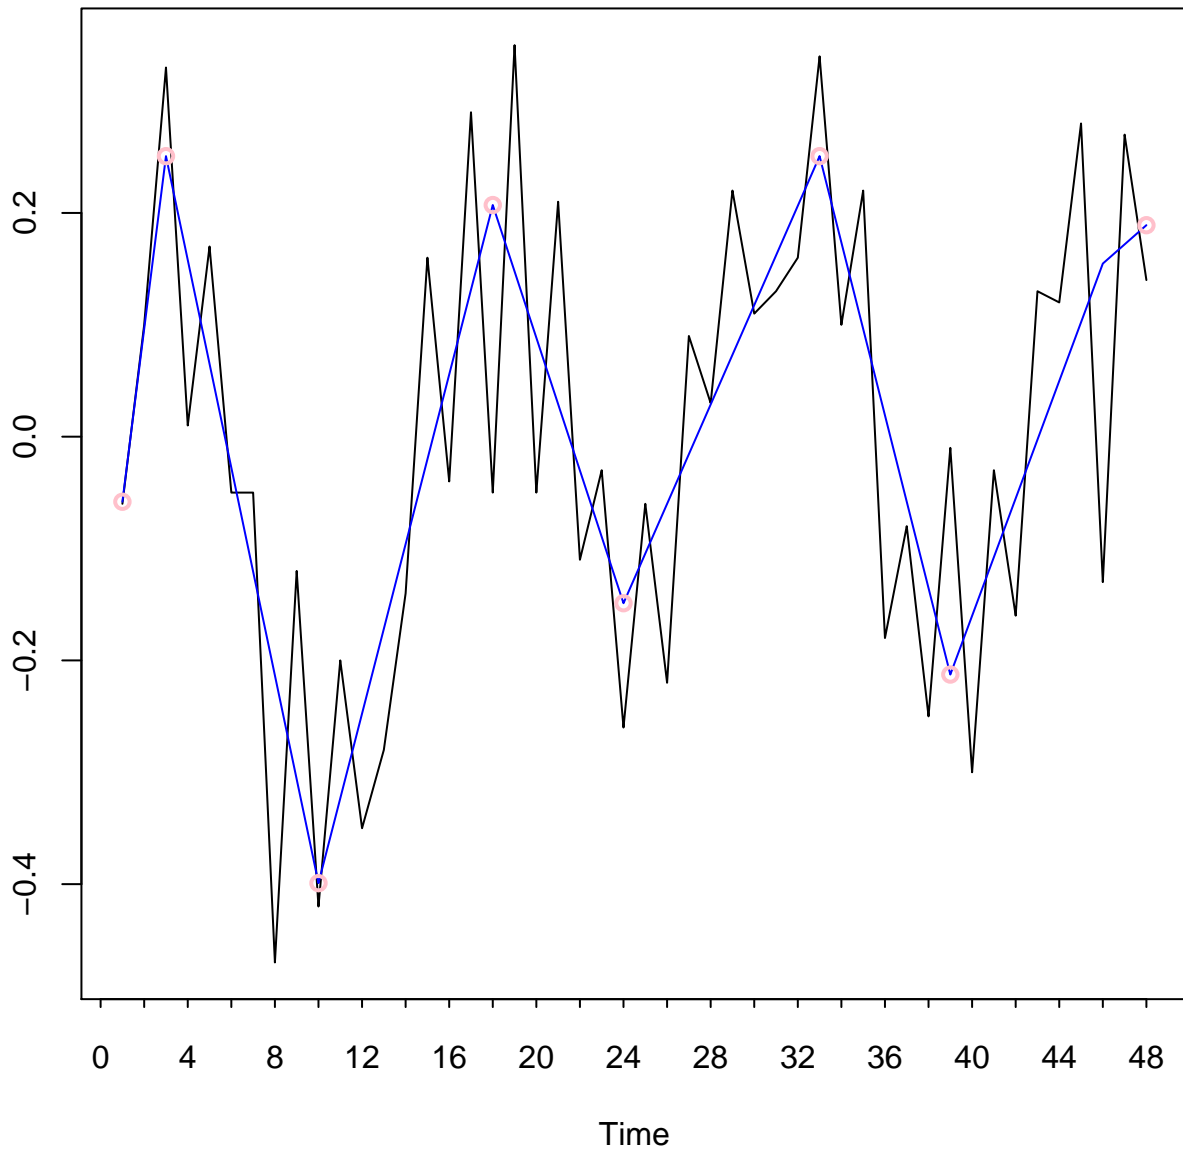



# PCNA\_AA450264

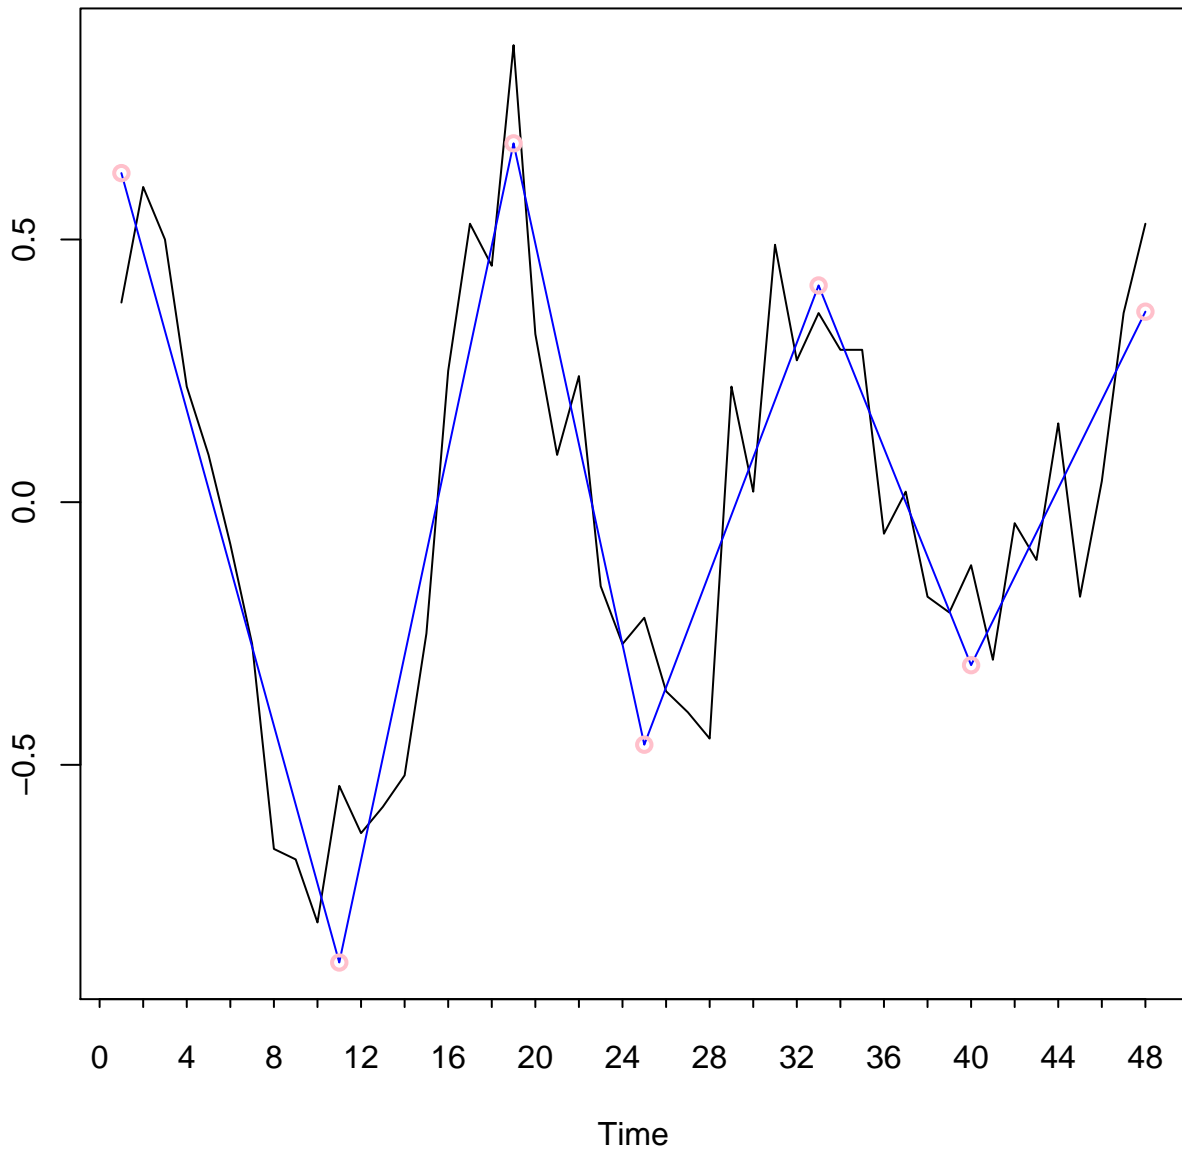

# RRM2\_AA187351

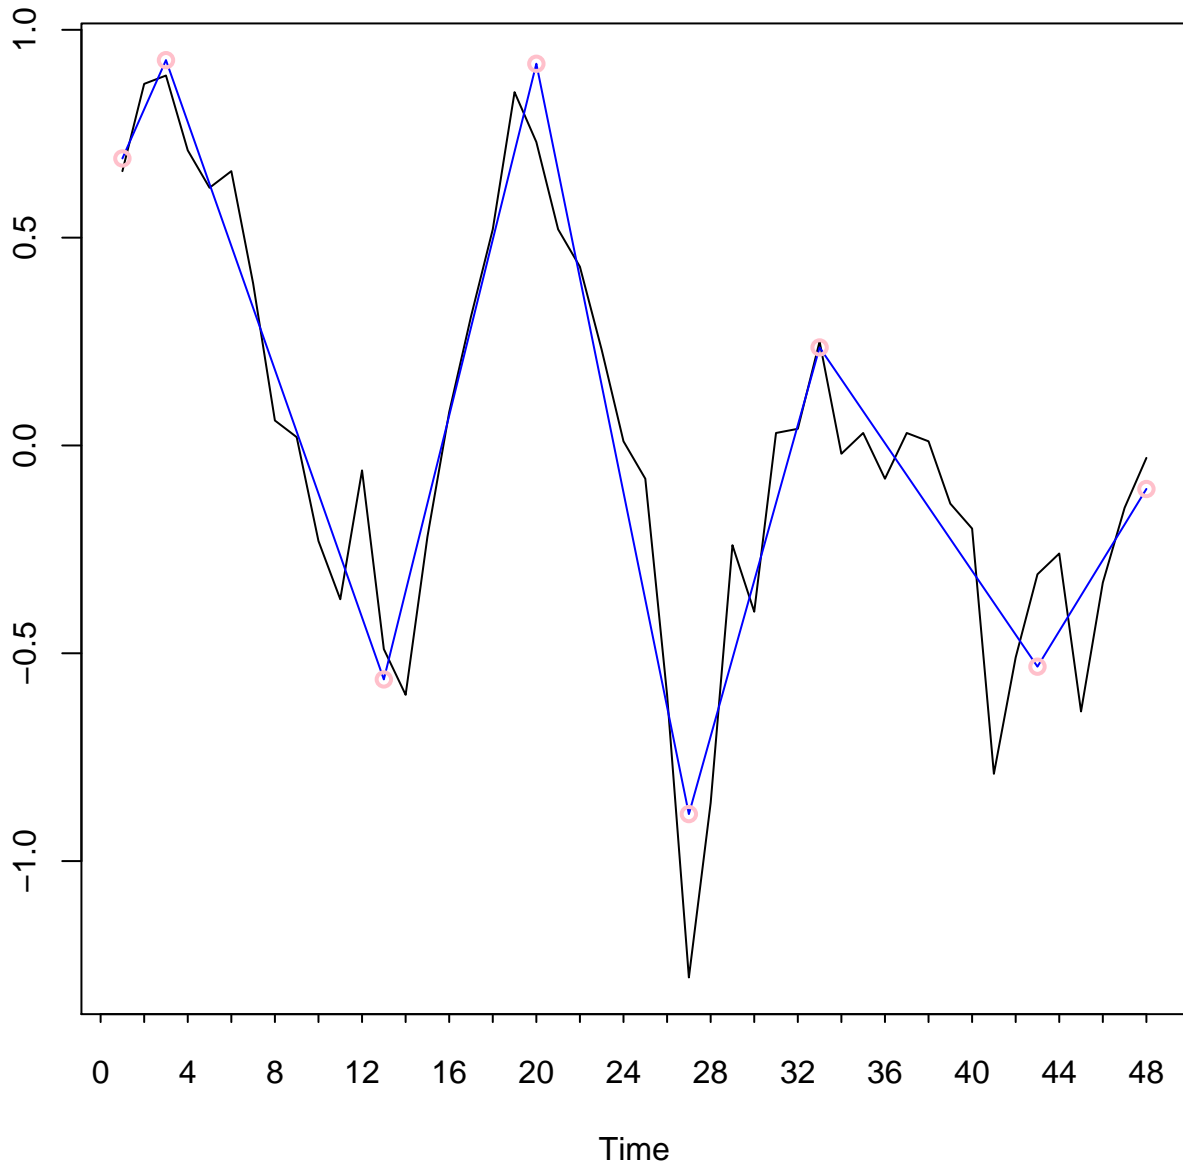

# TYMS

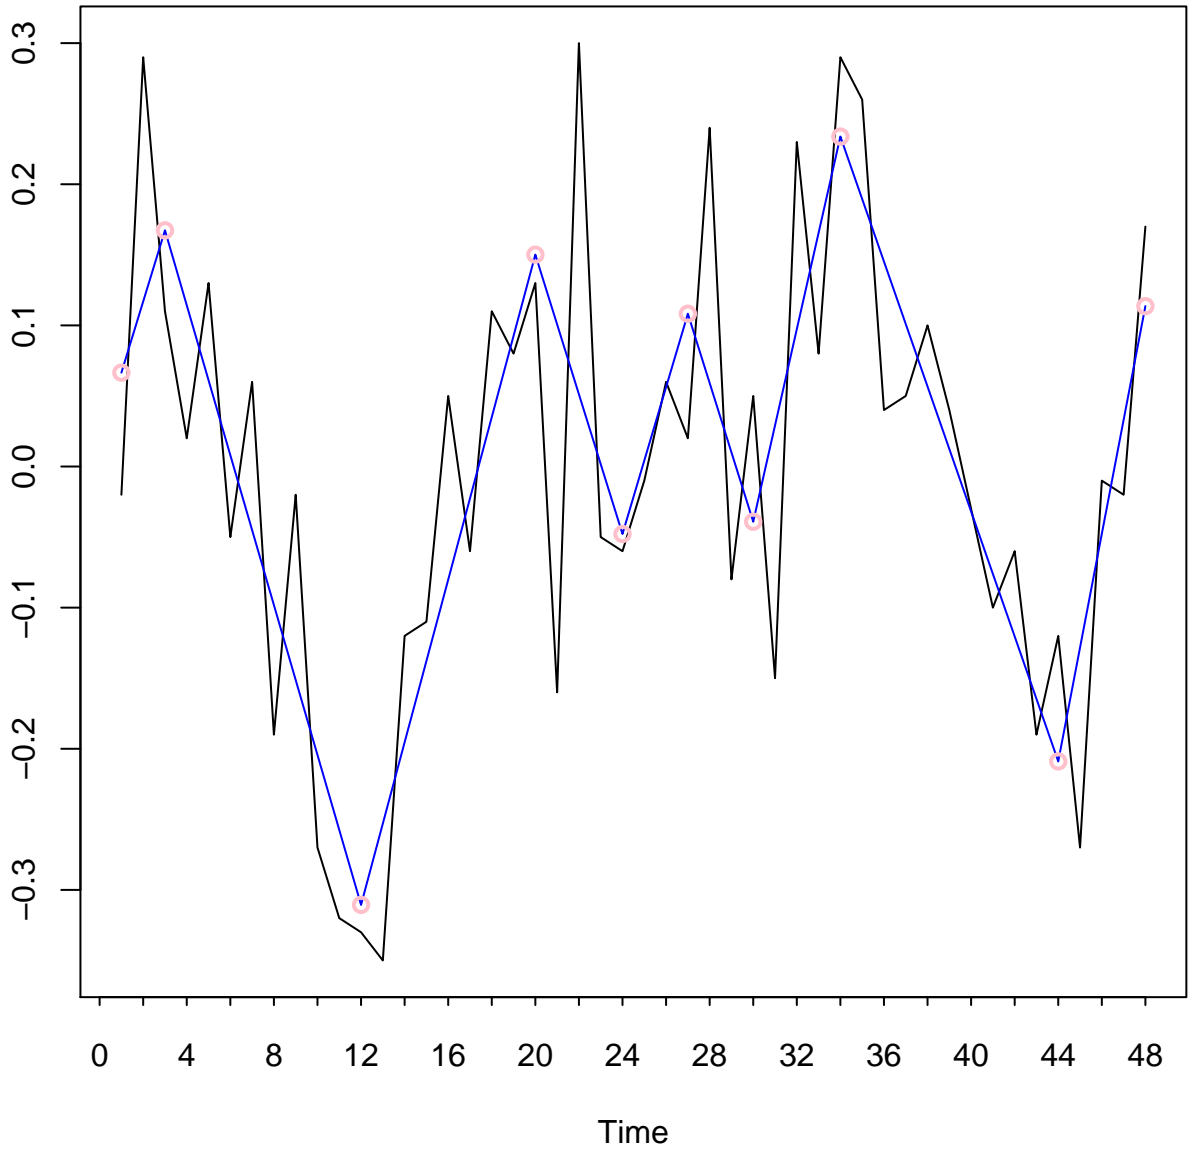

# CDC25A\_AA913262

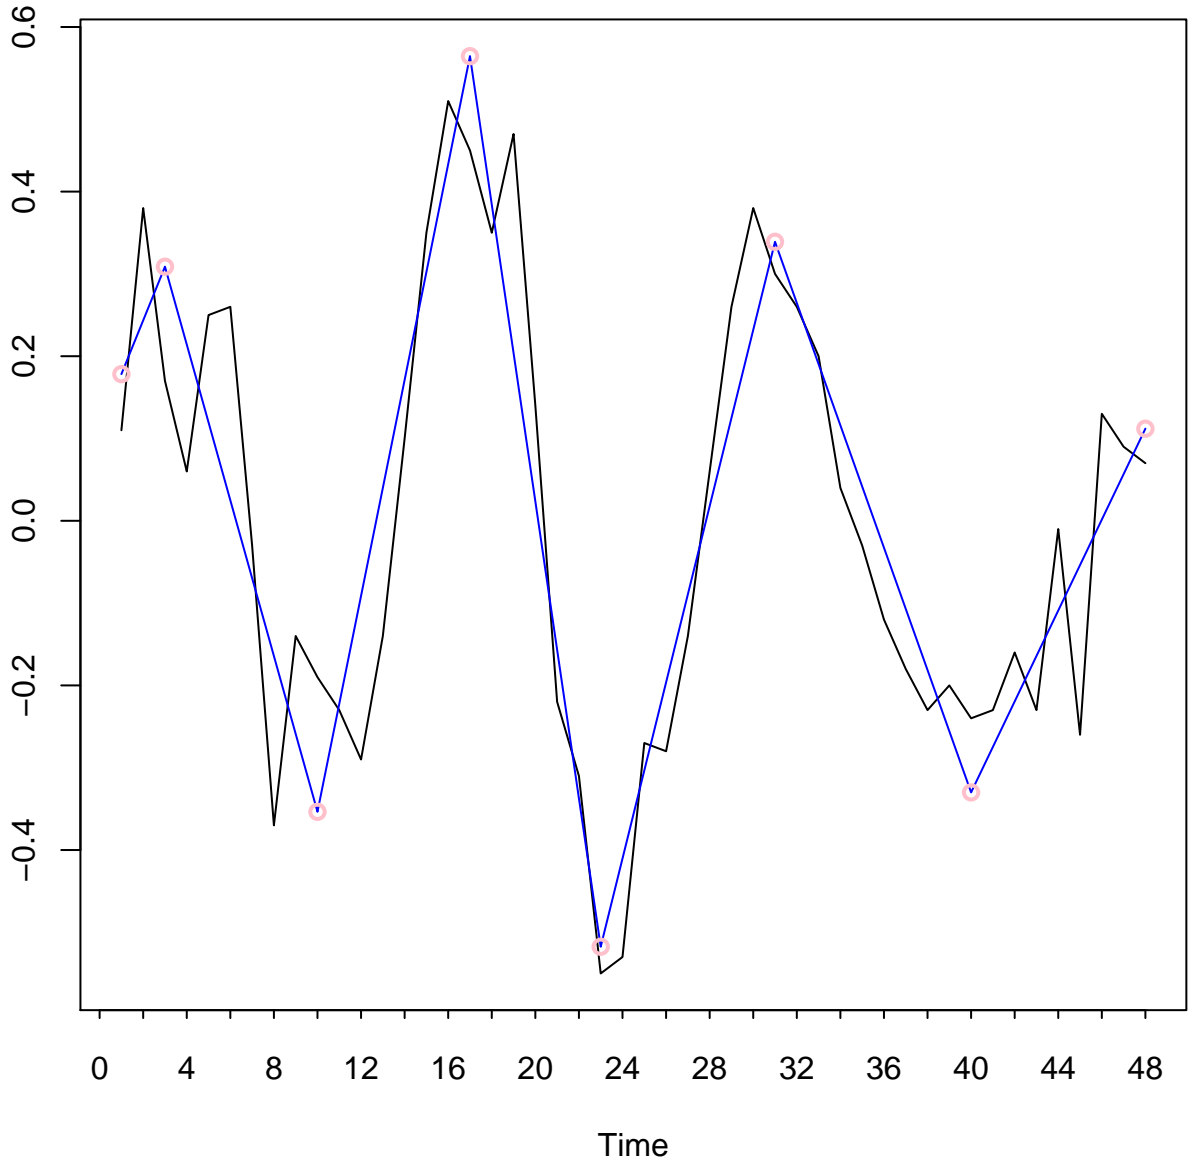

# CDC25A\_R09063

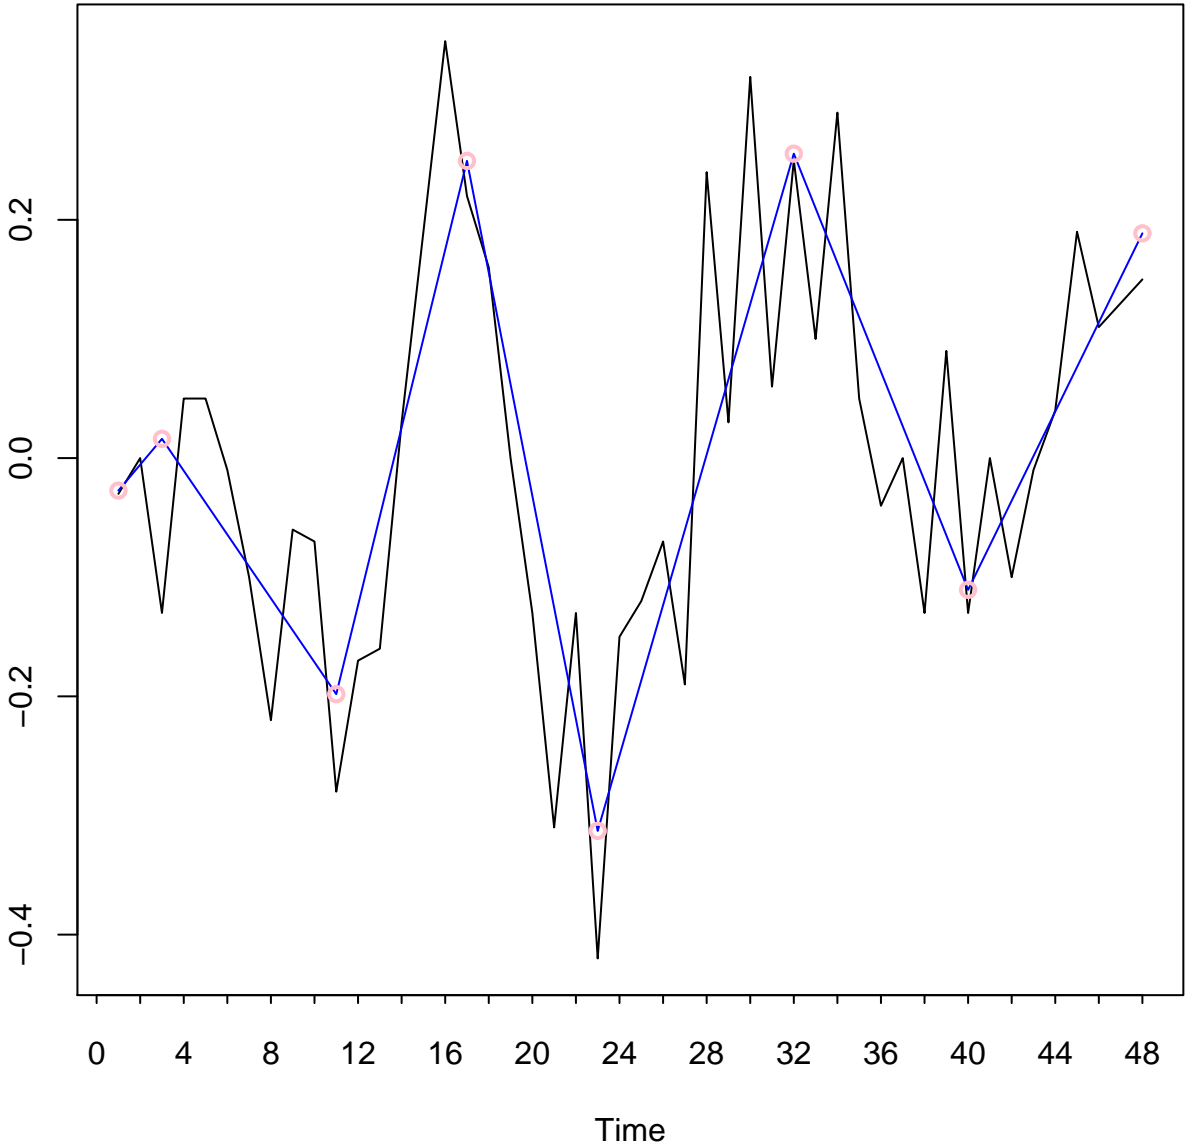

# RRM2\_AA826373

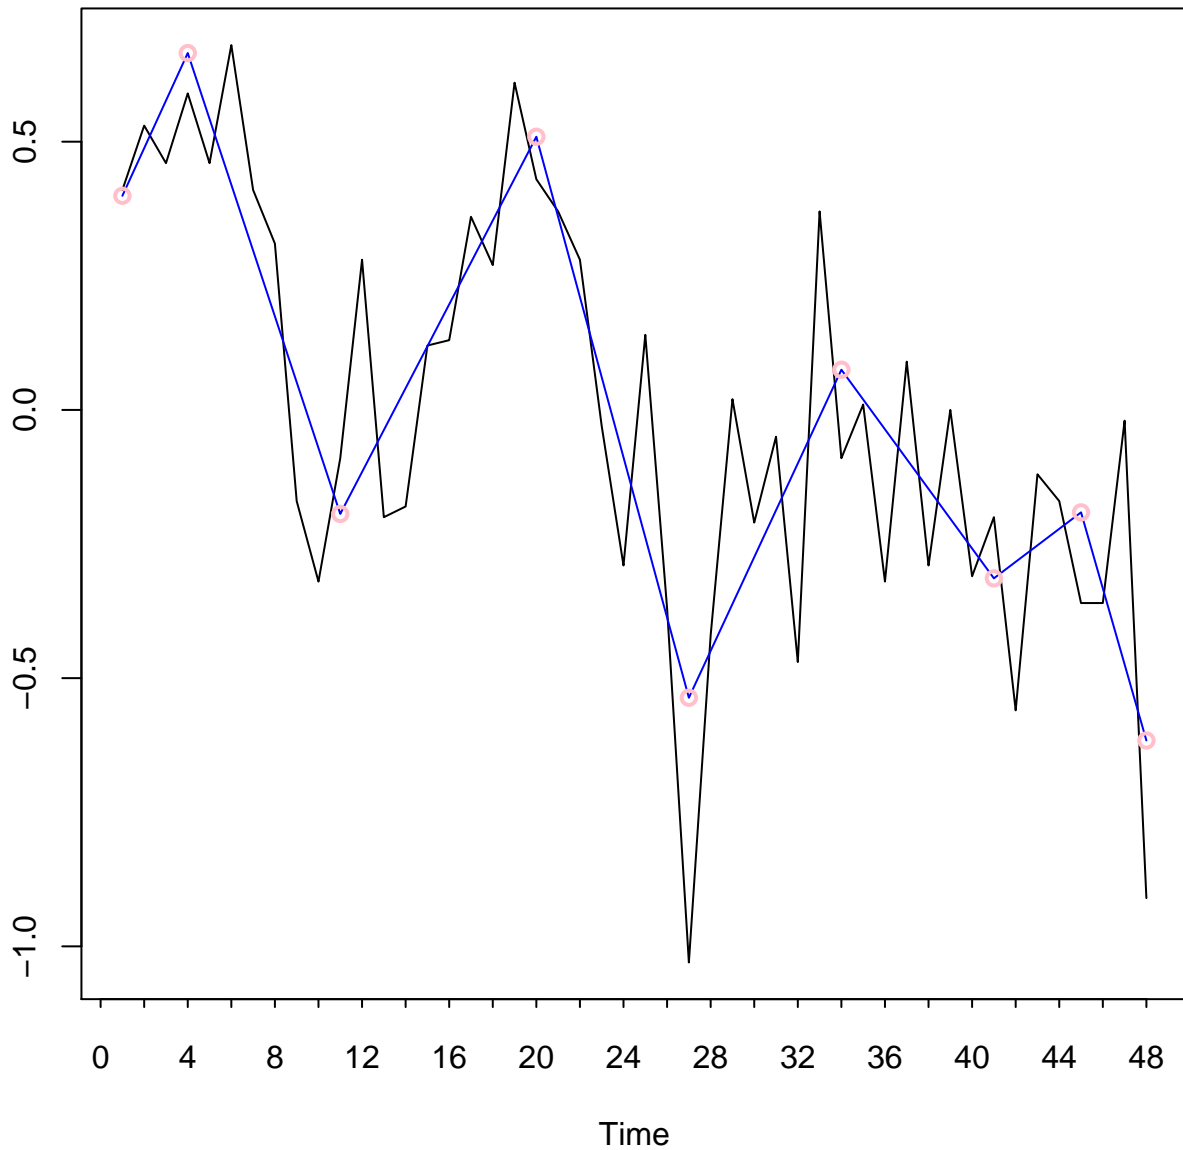

# CKS1\_AA278629

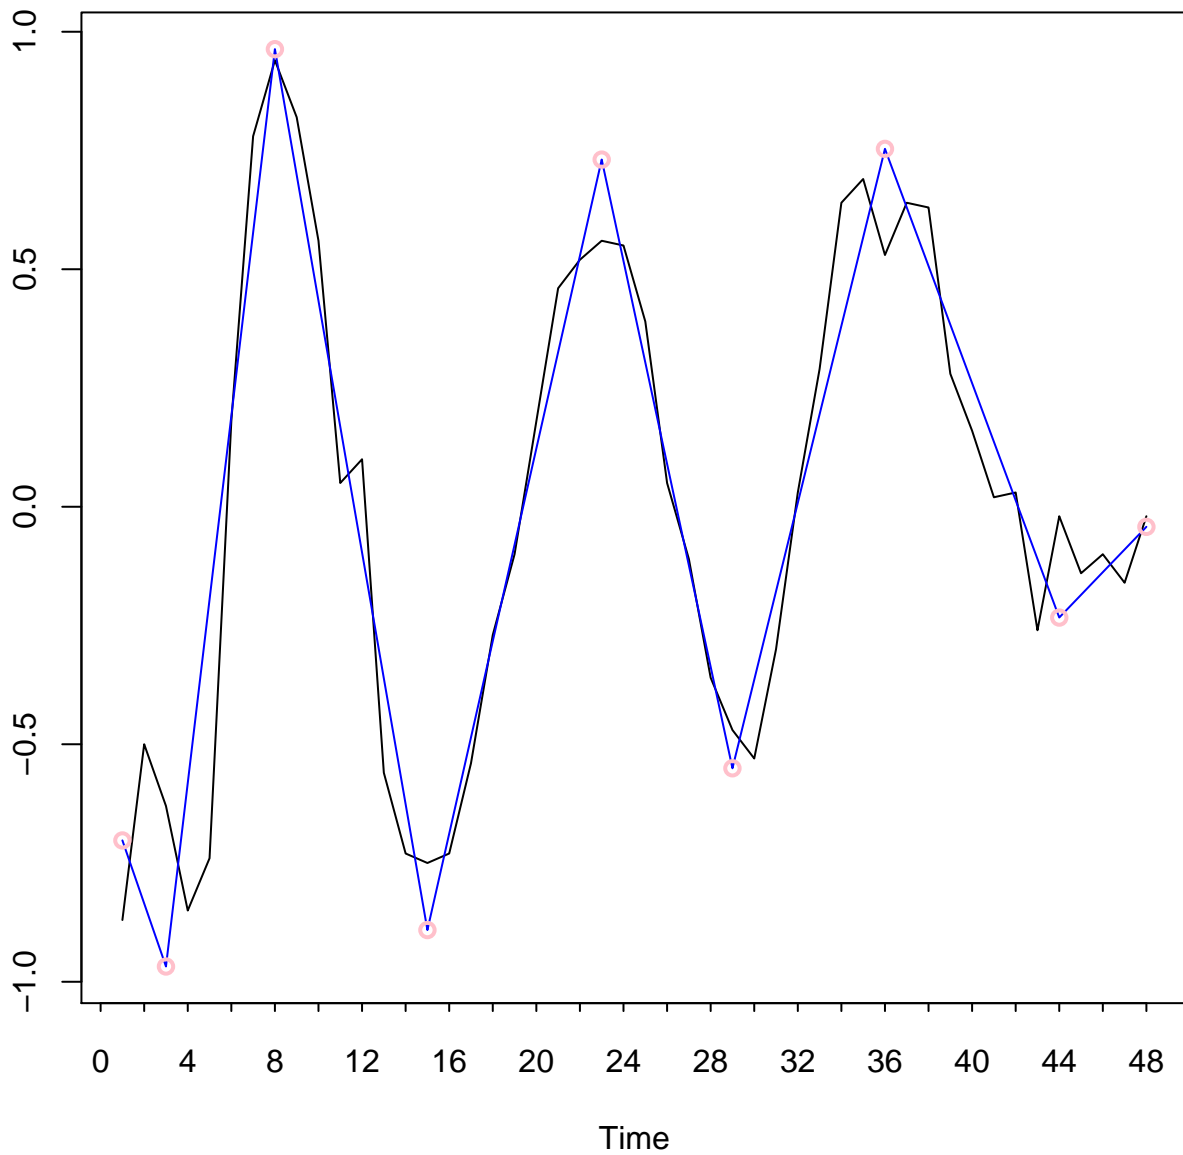

# CDC2

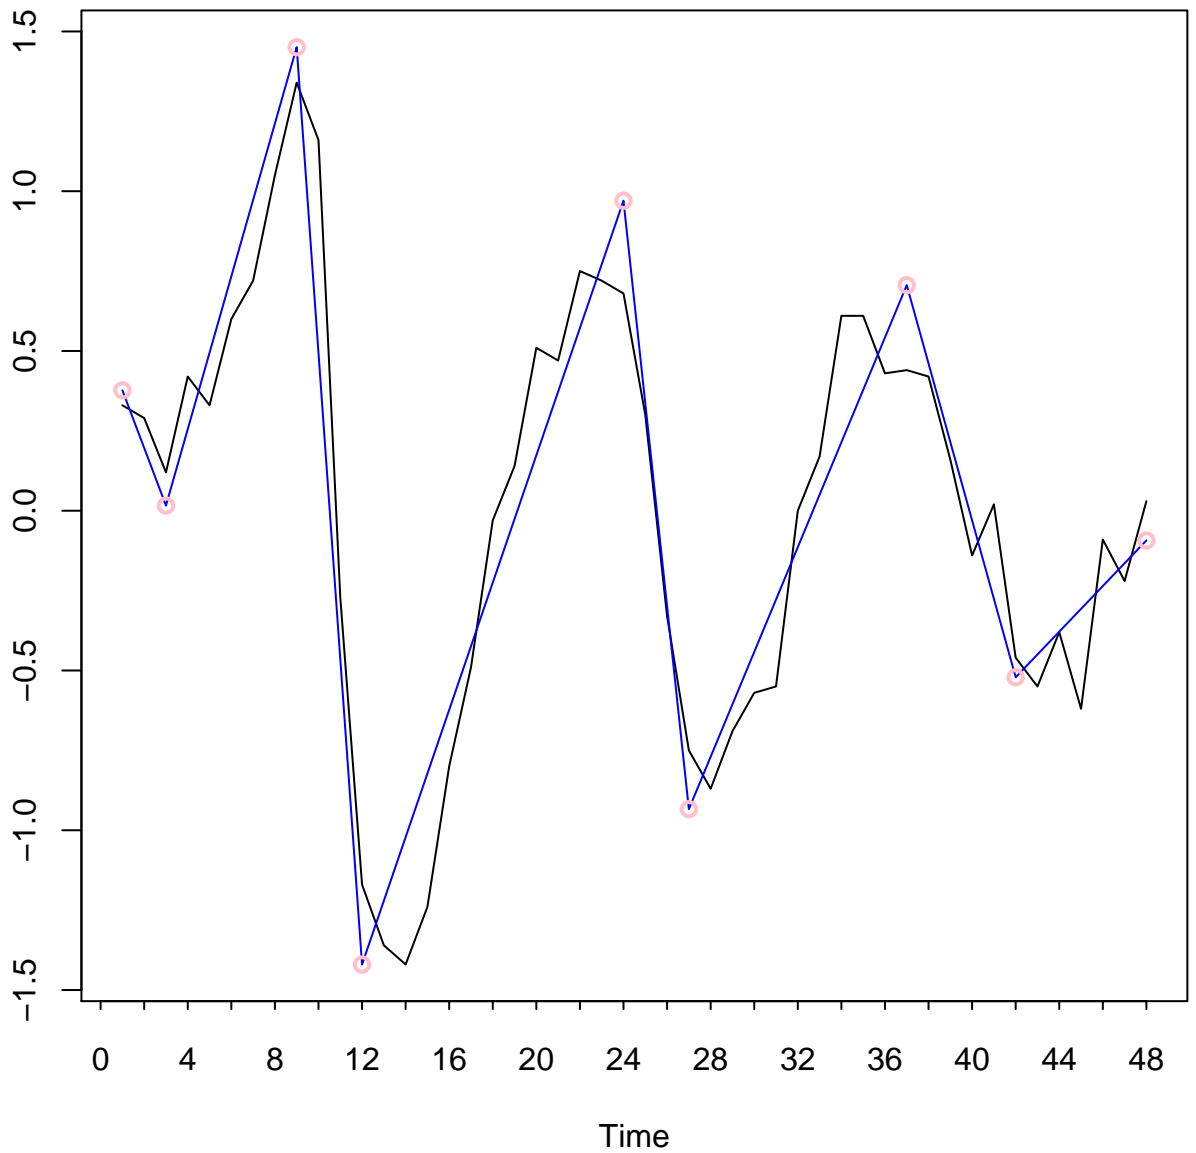



# CDC2\_AA278152

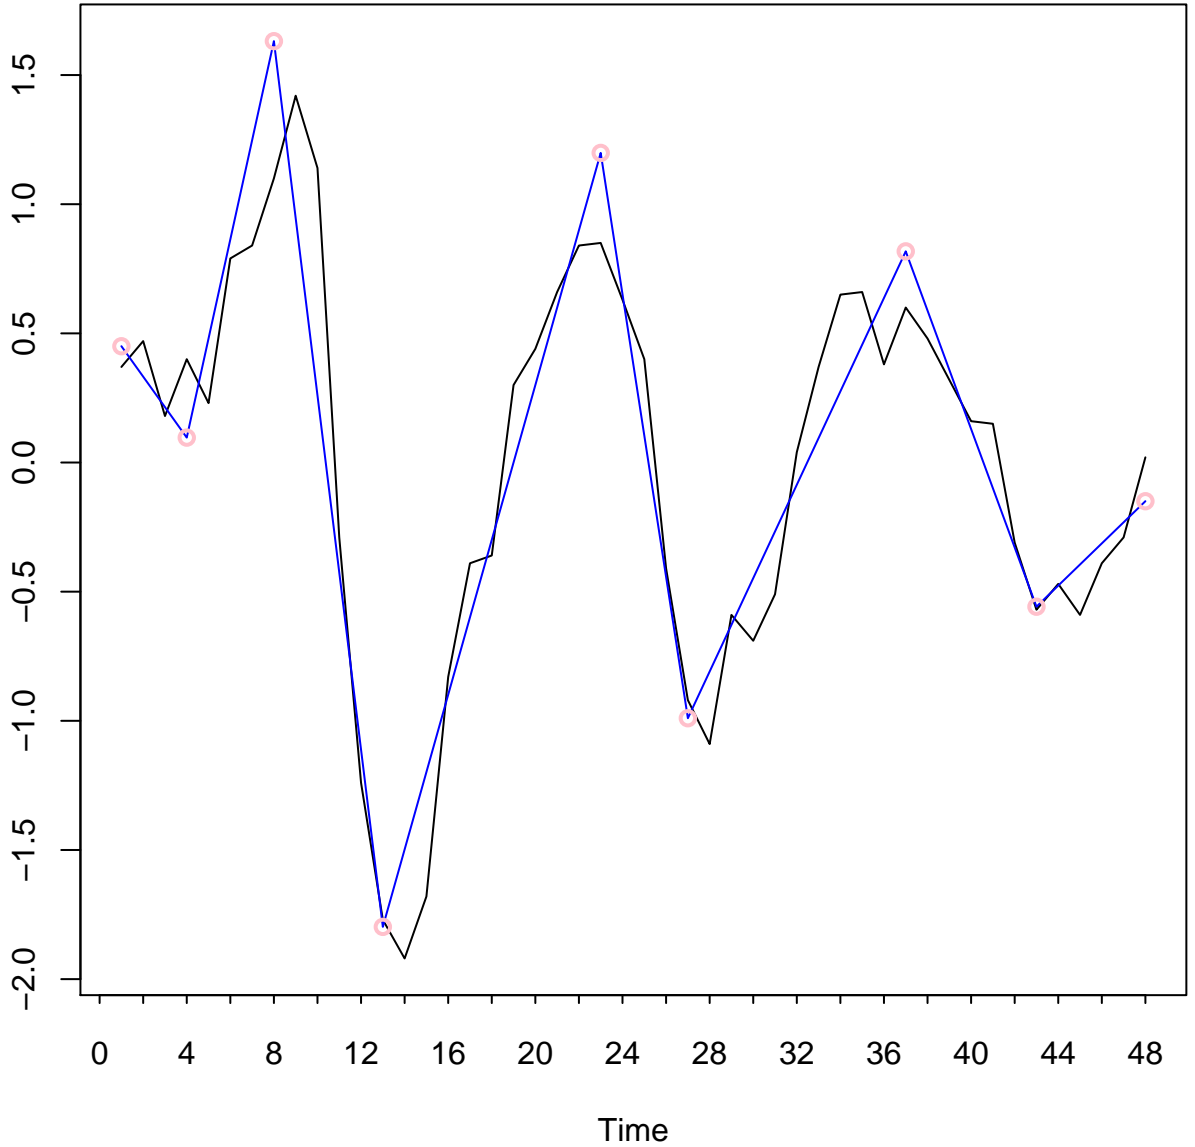

# BIRC5

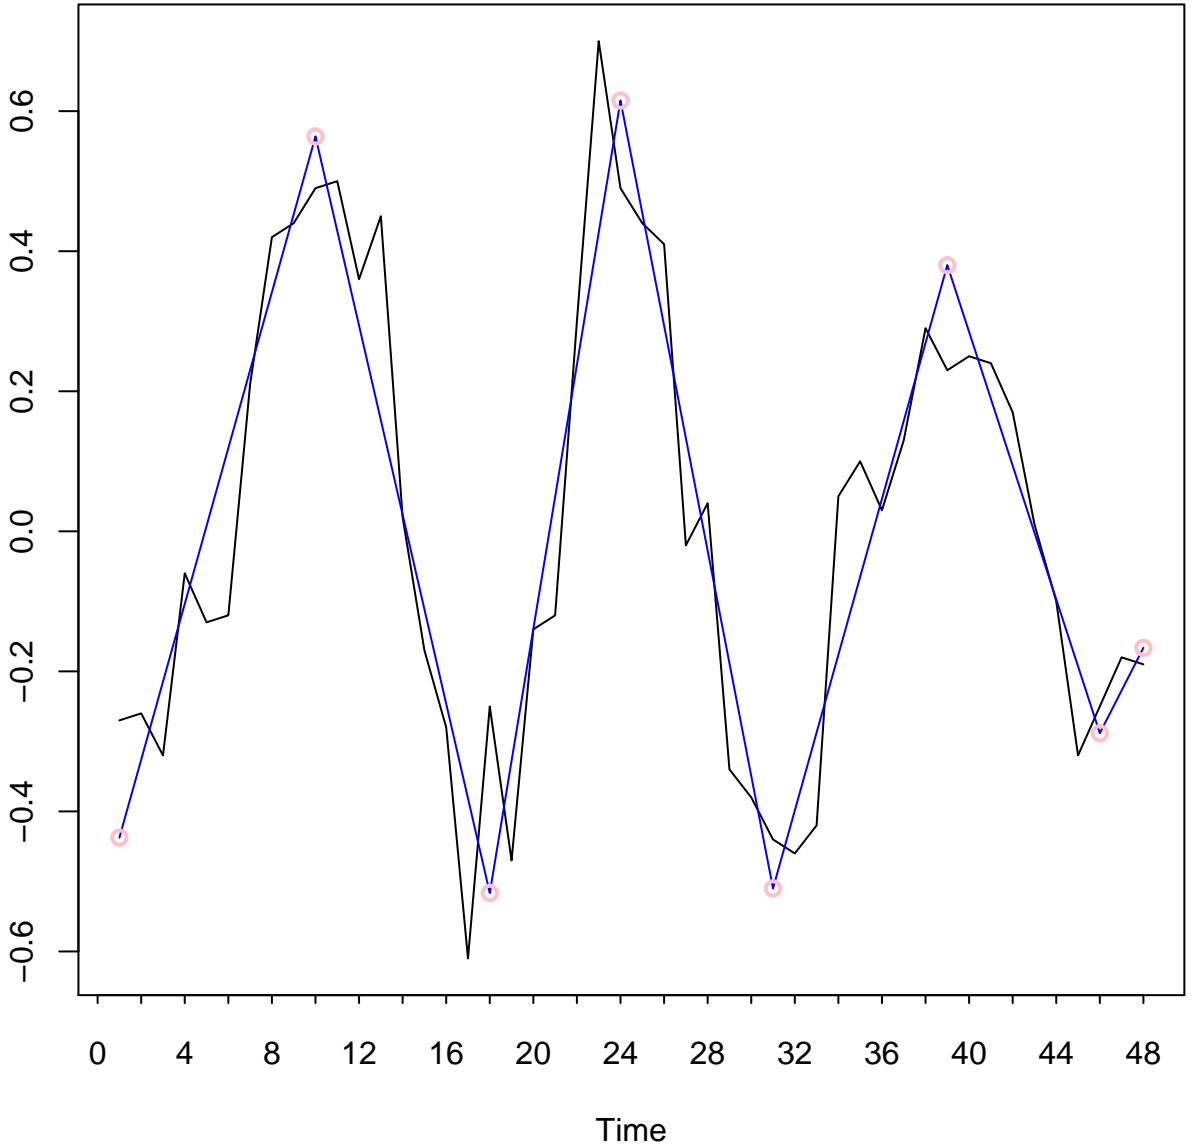

# BUB1B

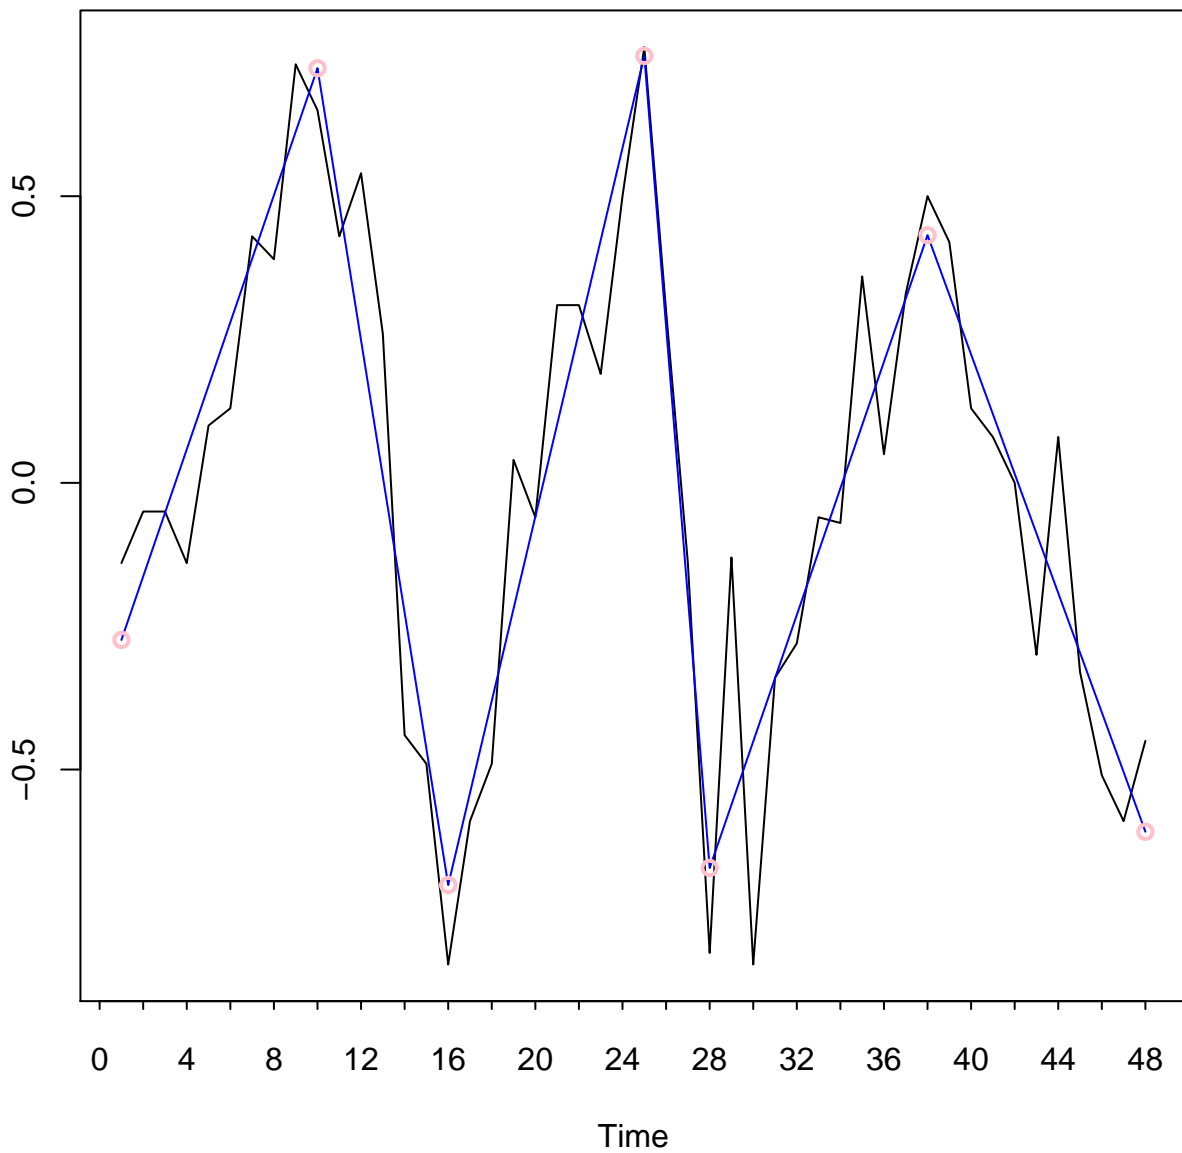

# BUB3

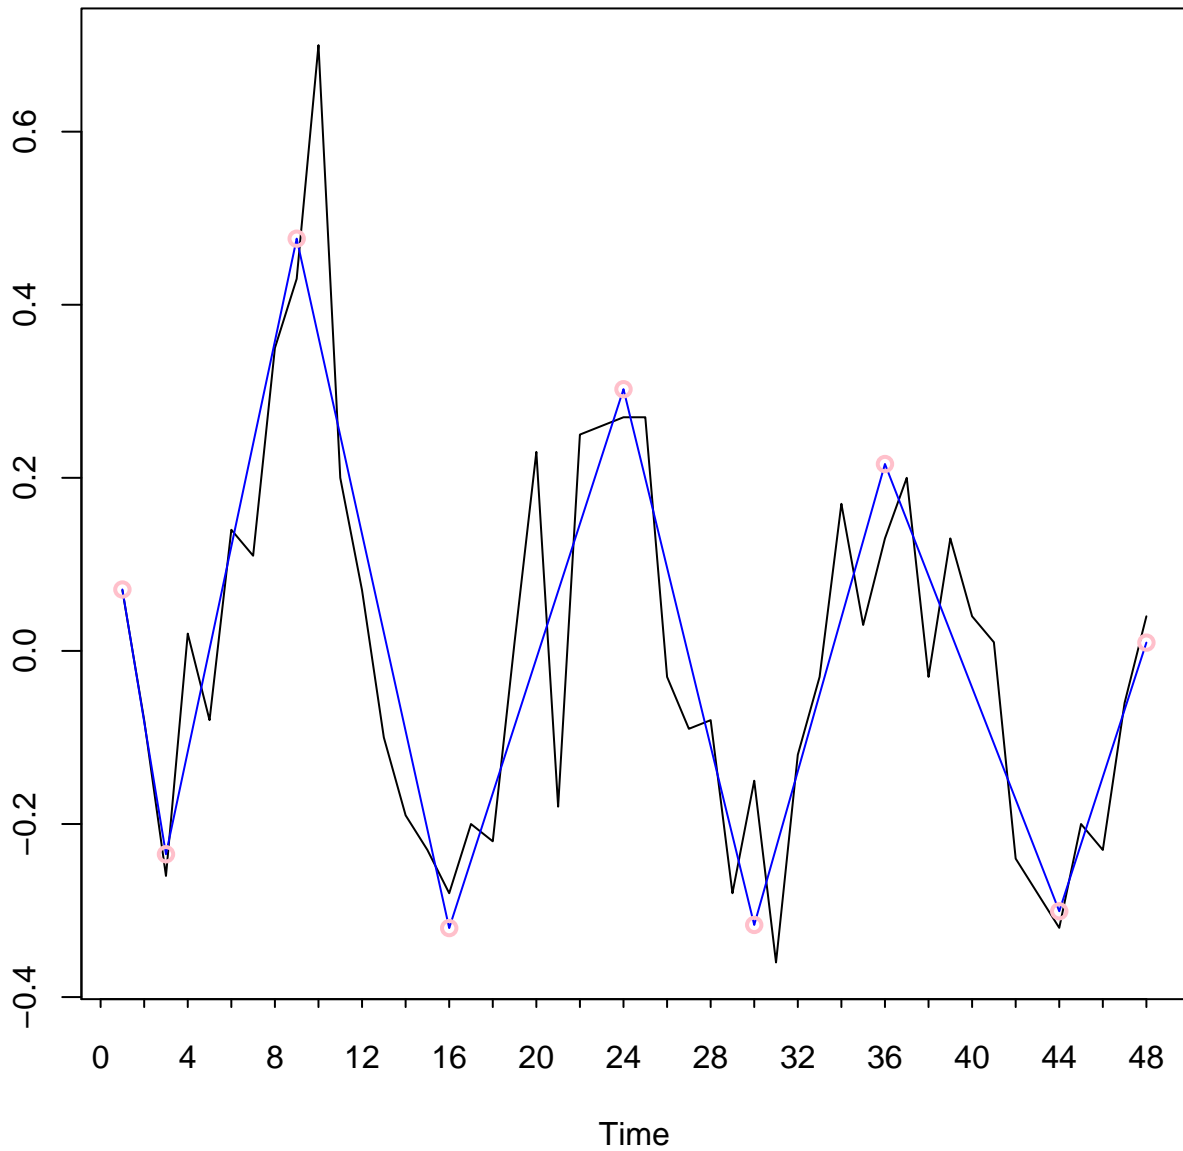

# BUB3\_AA405955

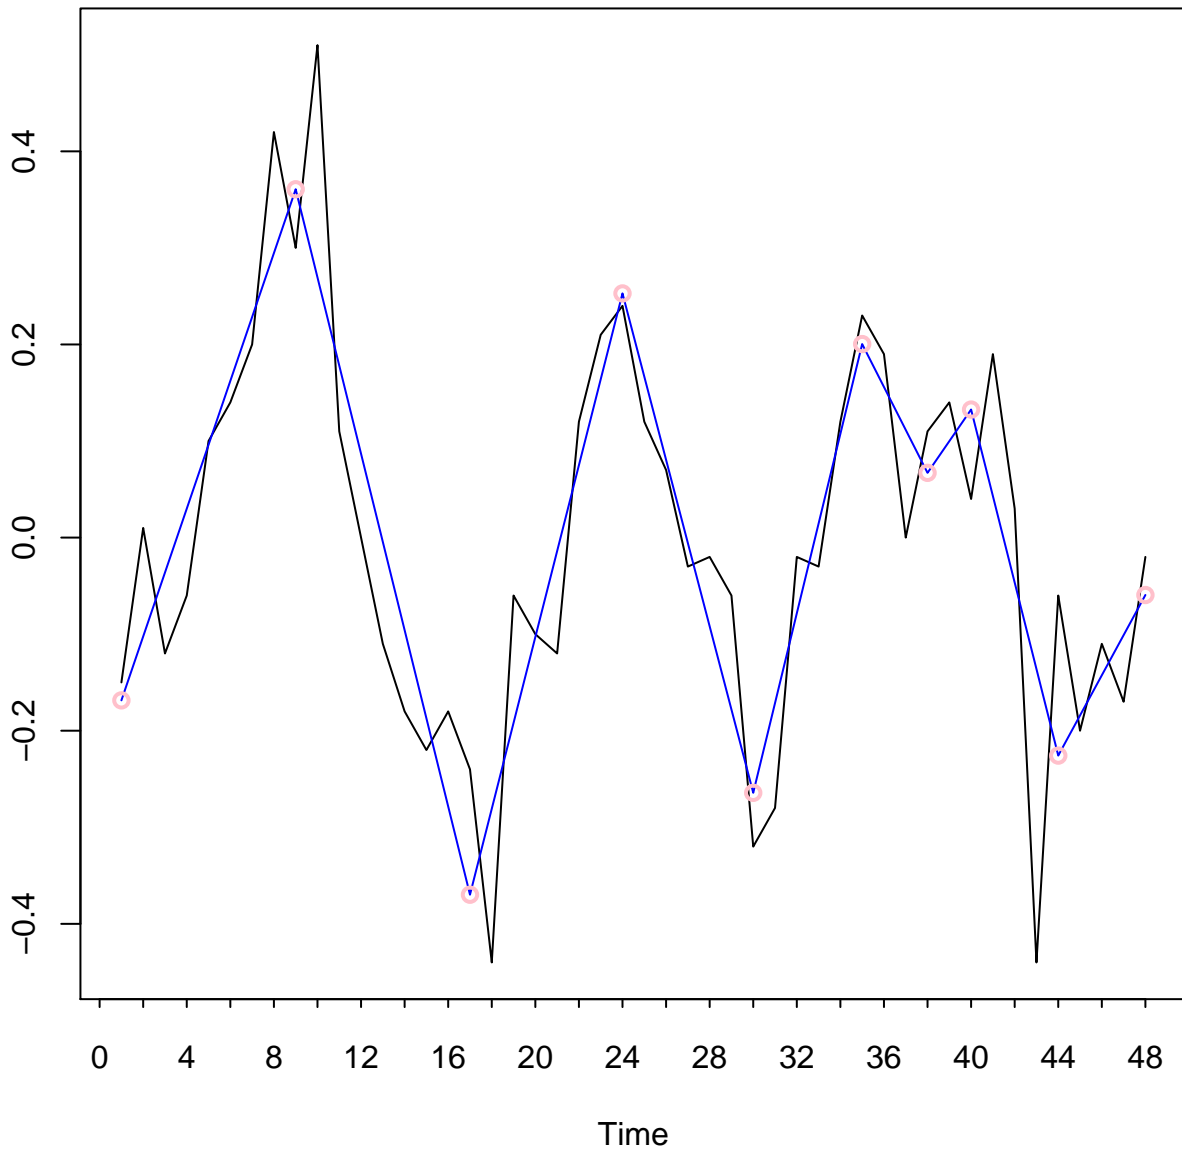

# CCNB2

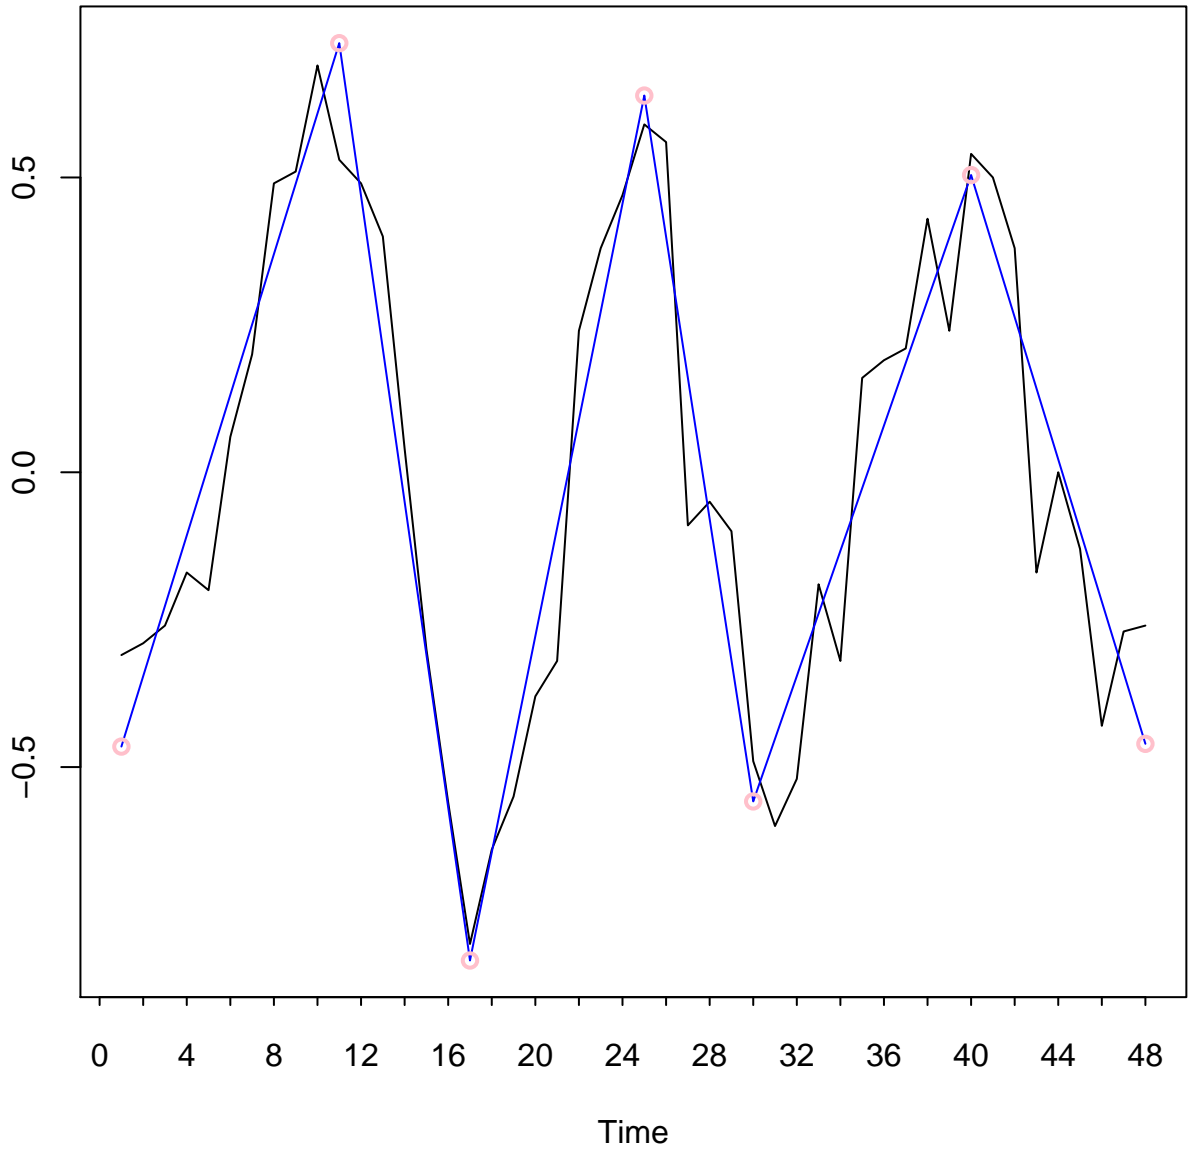

# CCND1(PRAD1)\_AA487700

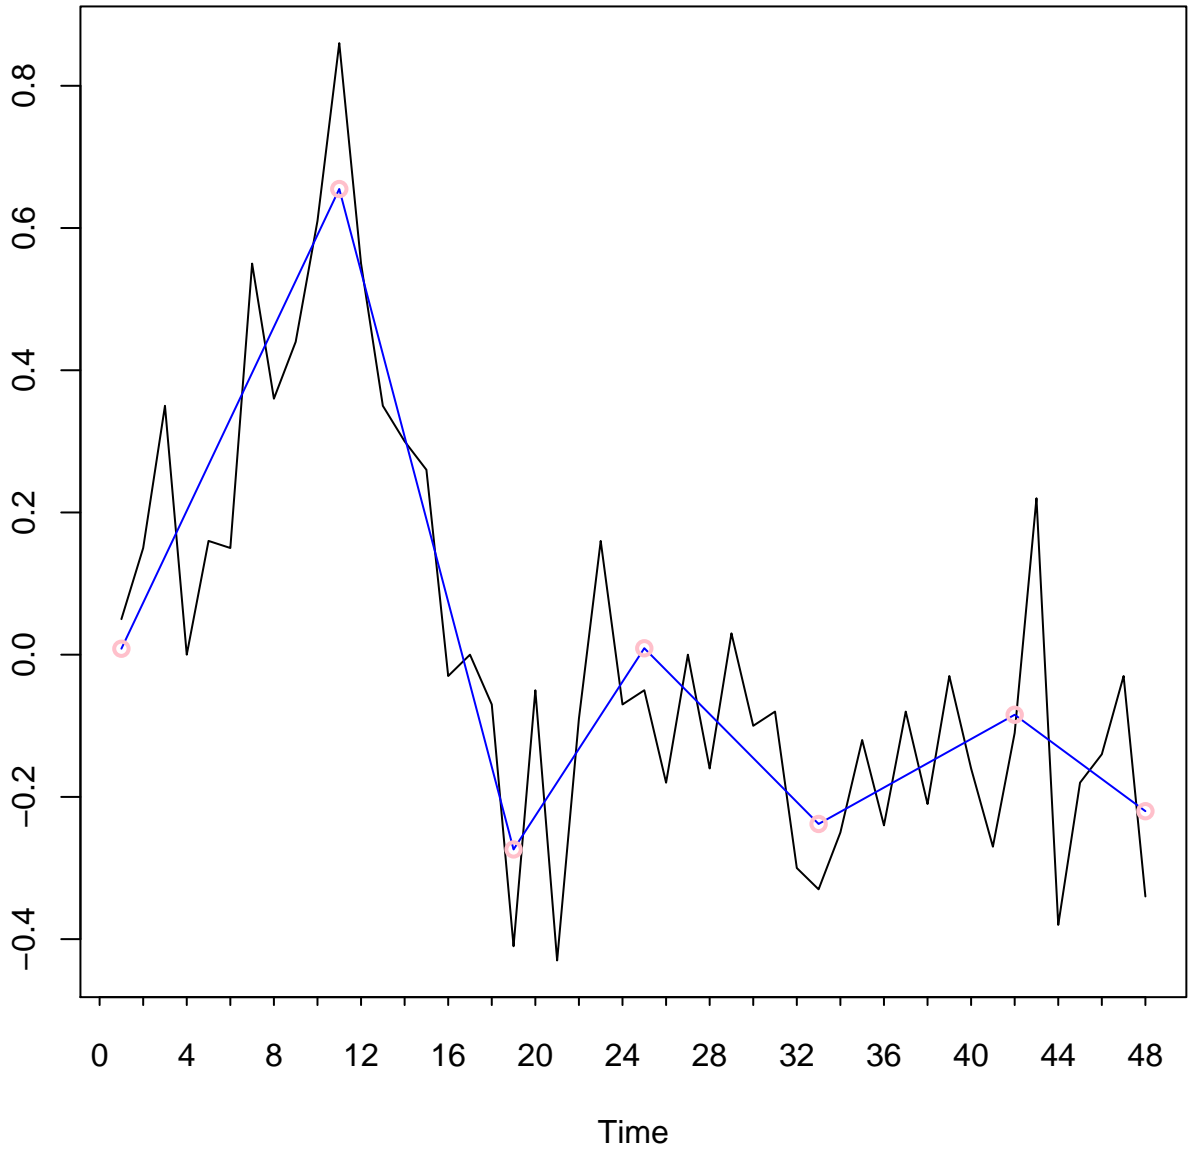

# CCNF

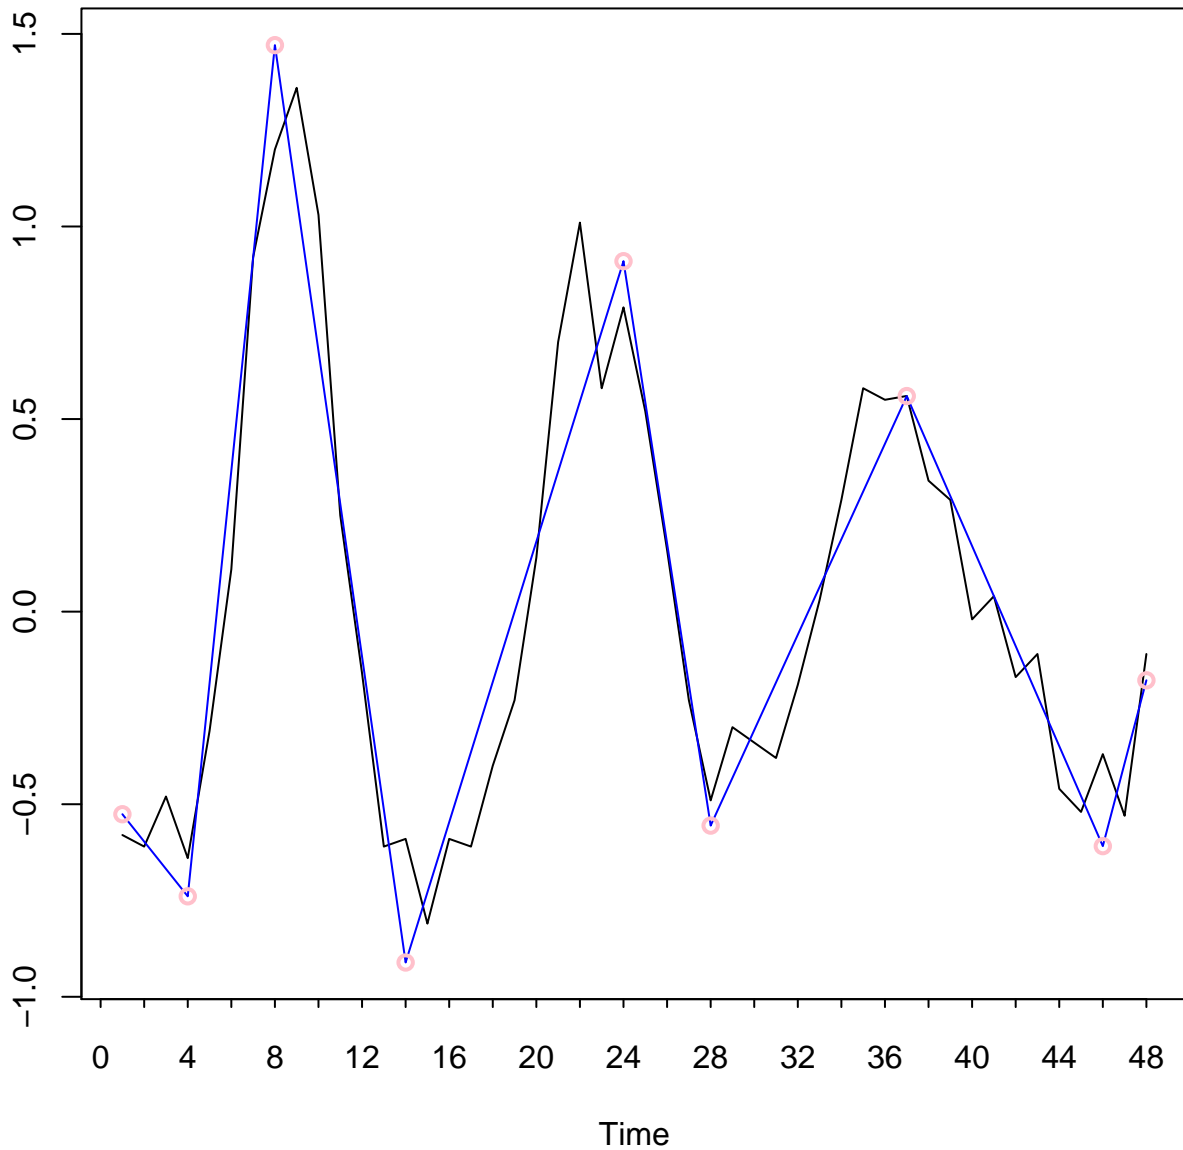



# CDC25C

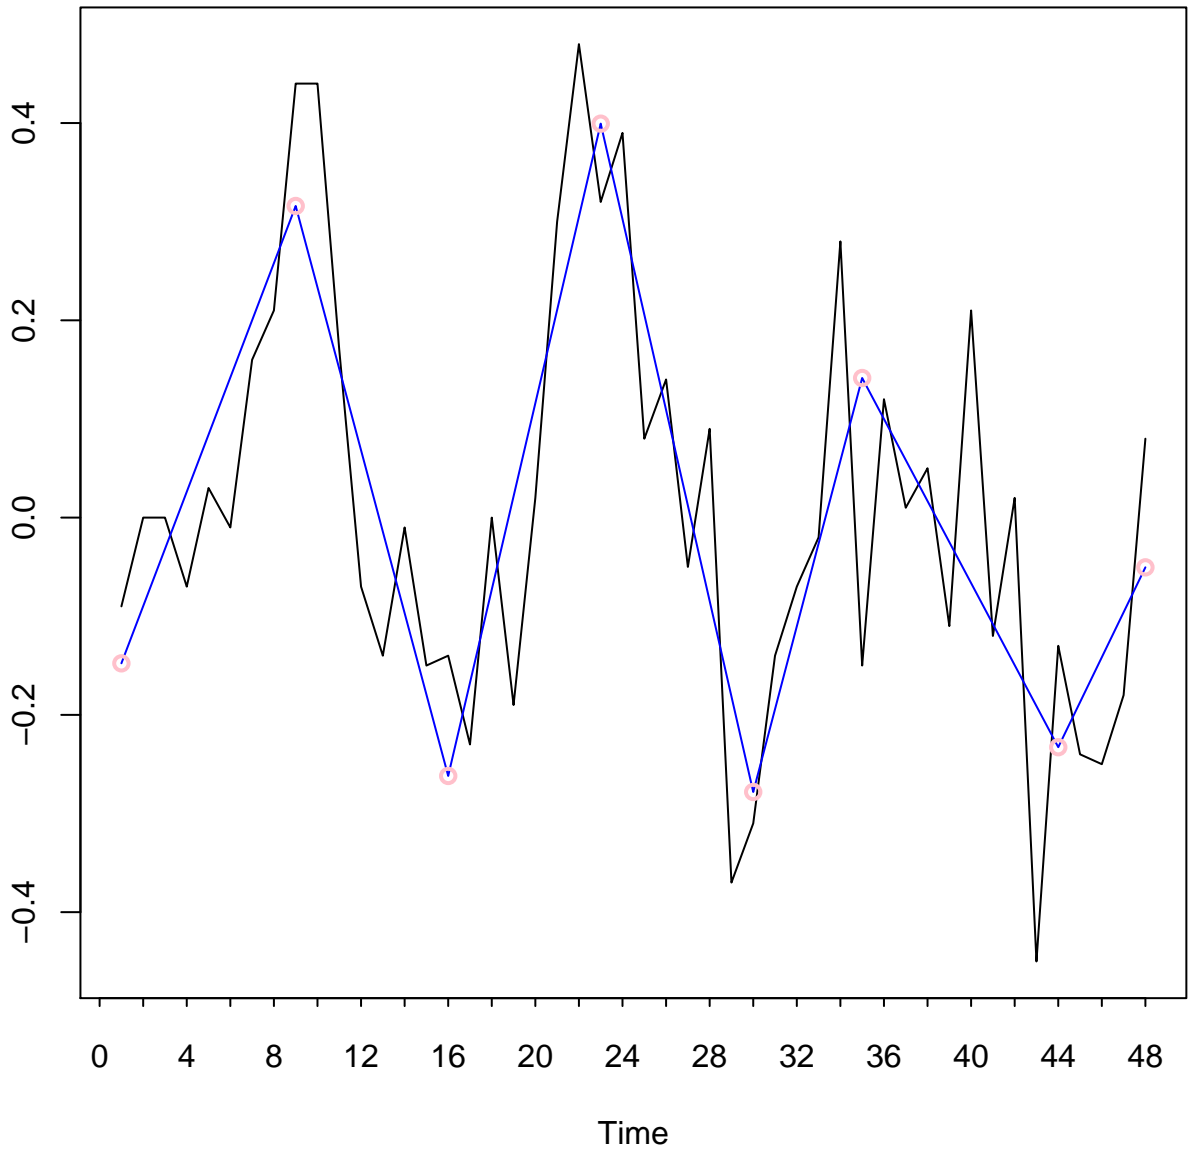

# CDC27

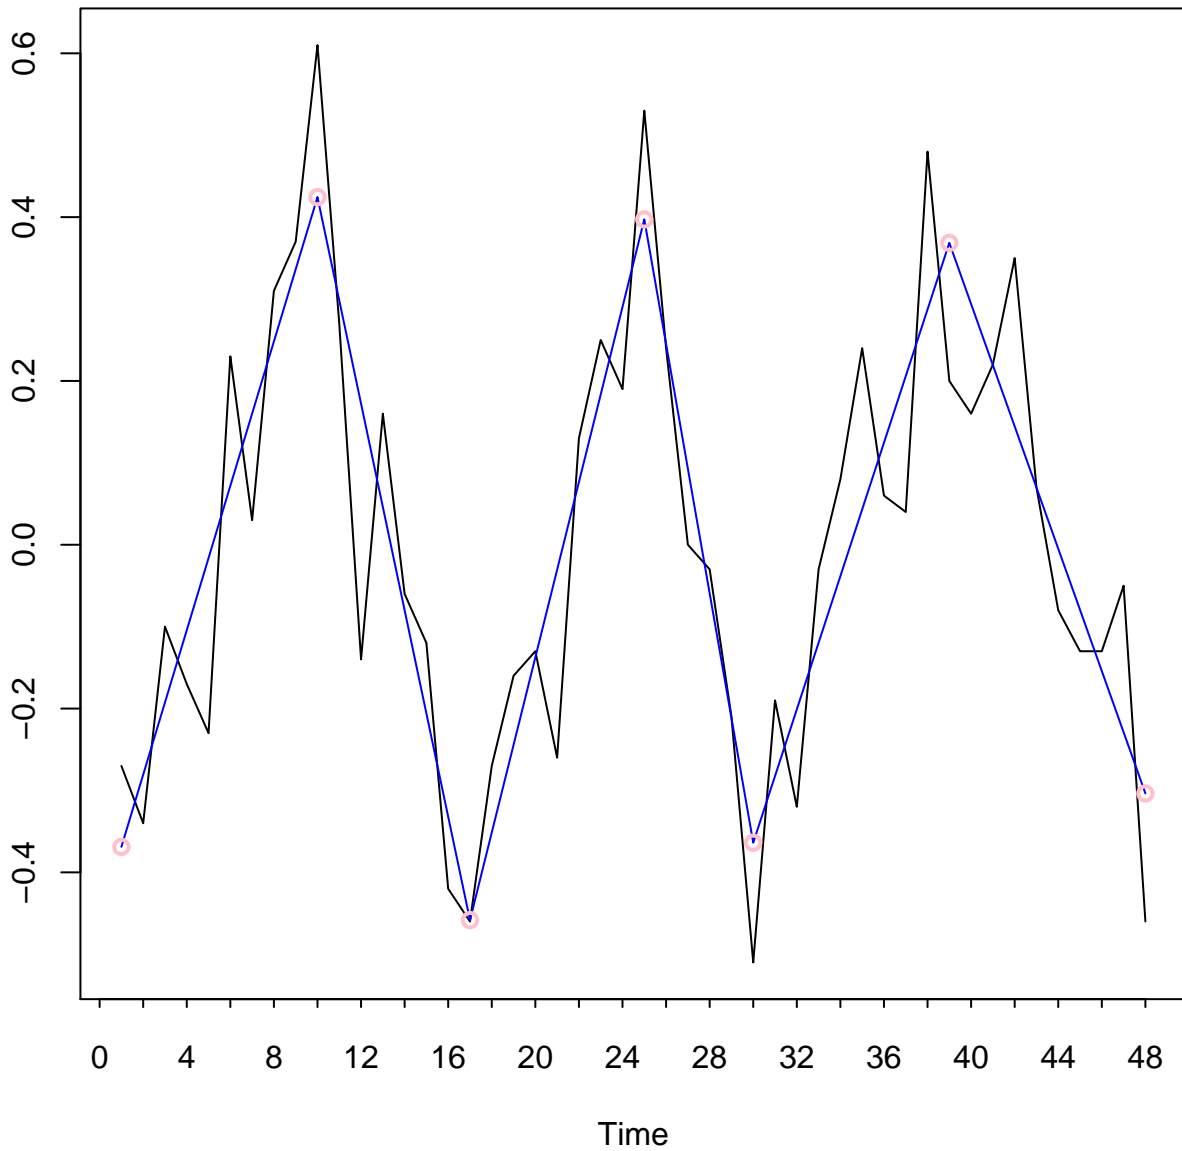

# CDKN1B(p27.Kip1)

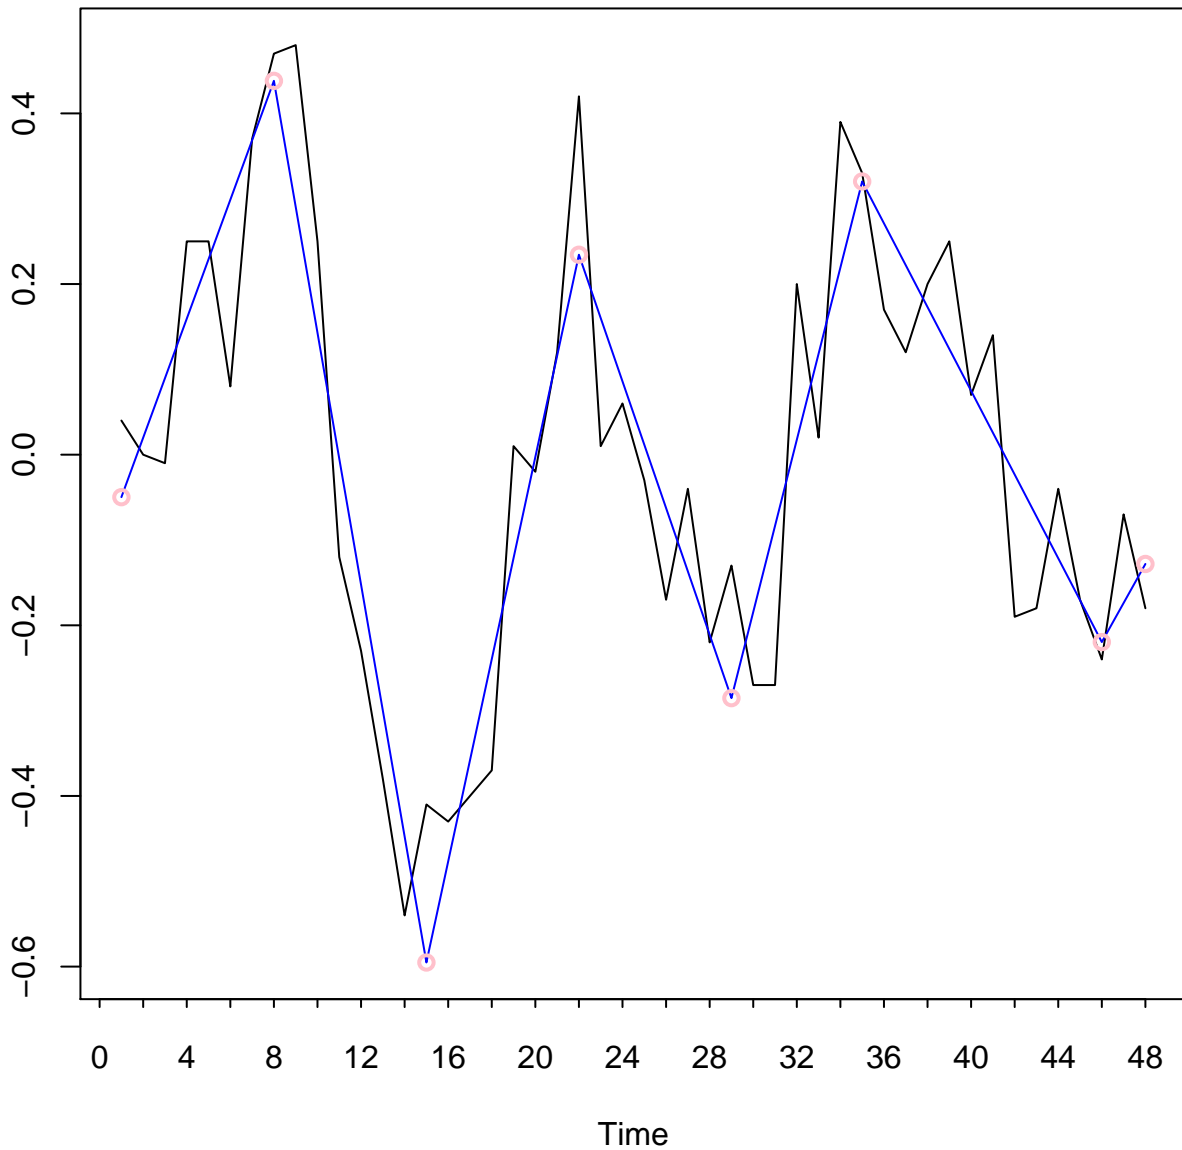

# CDKN3

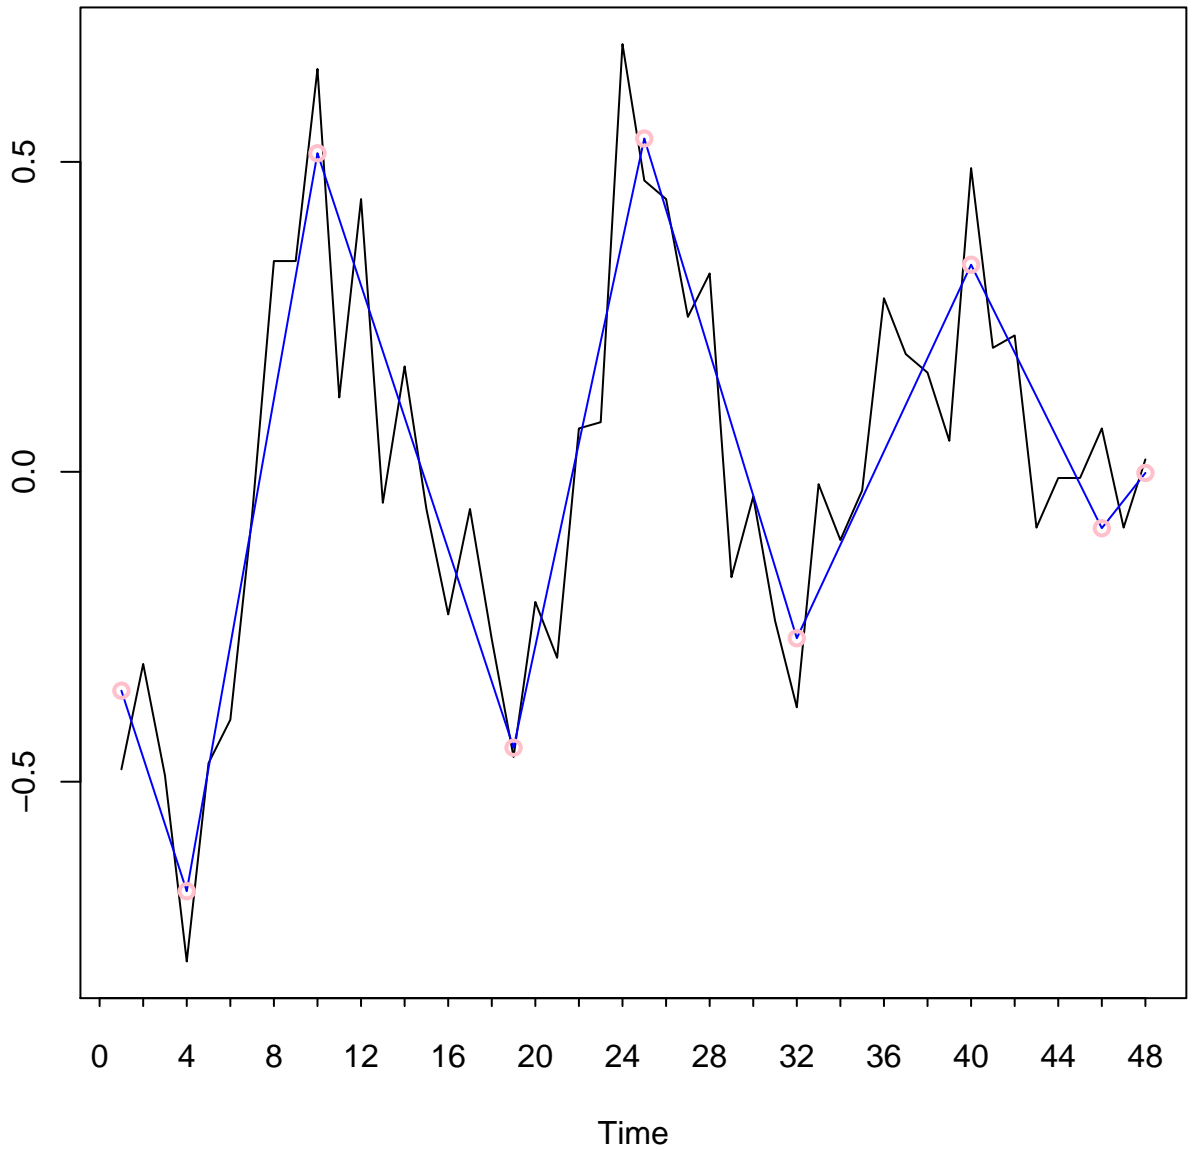

# CENPA

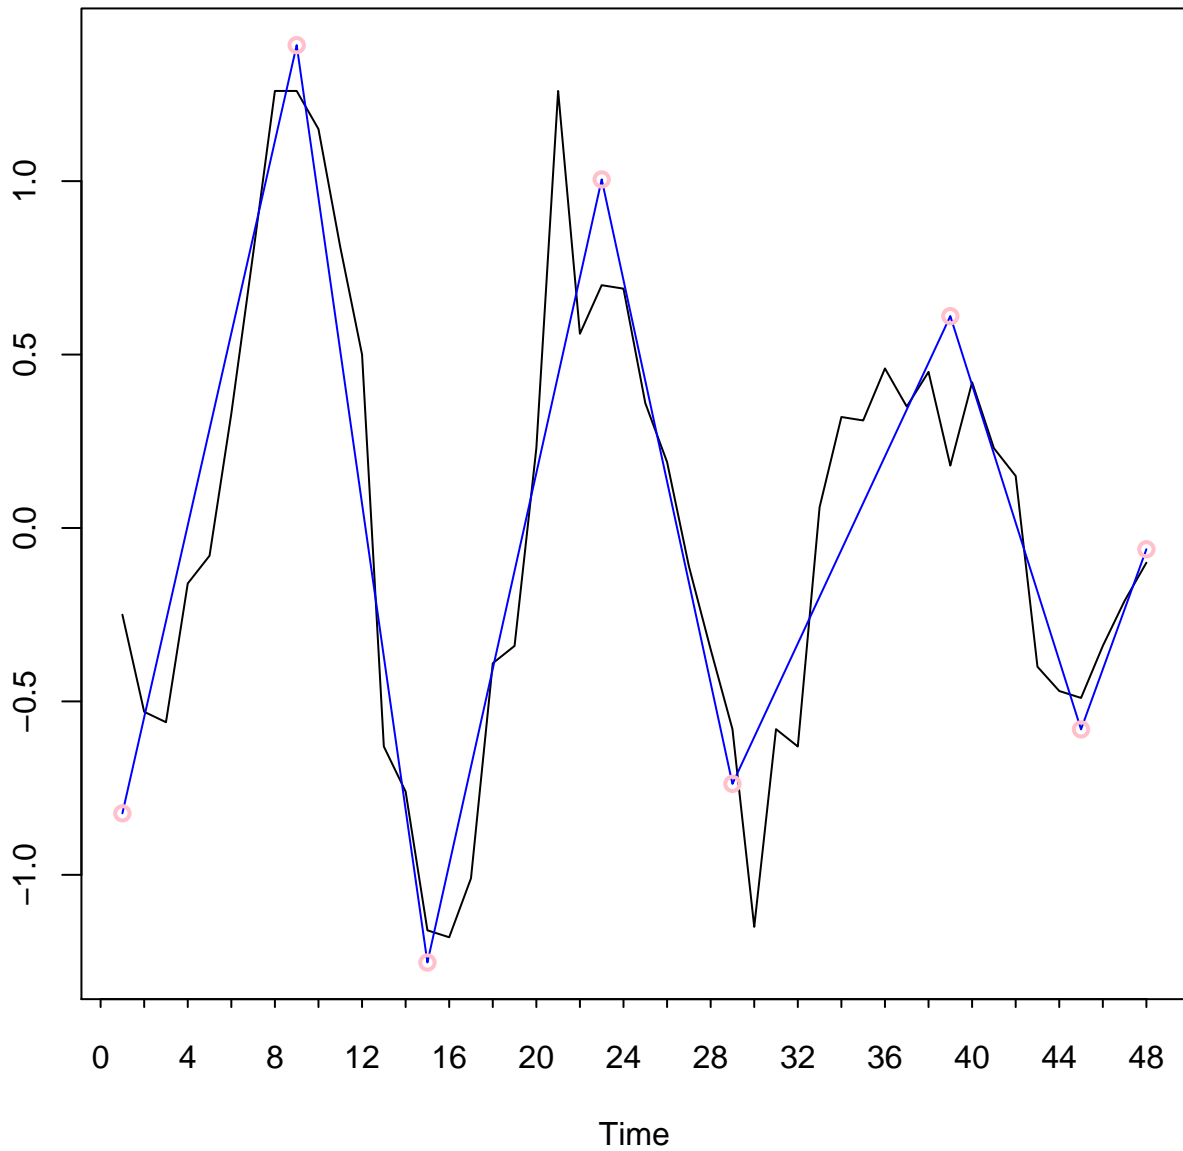

# CENPF

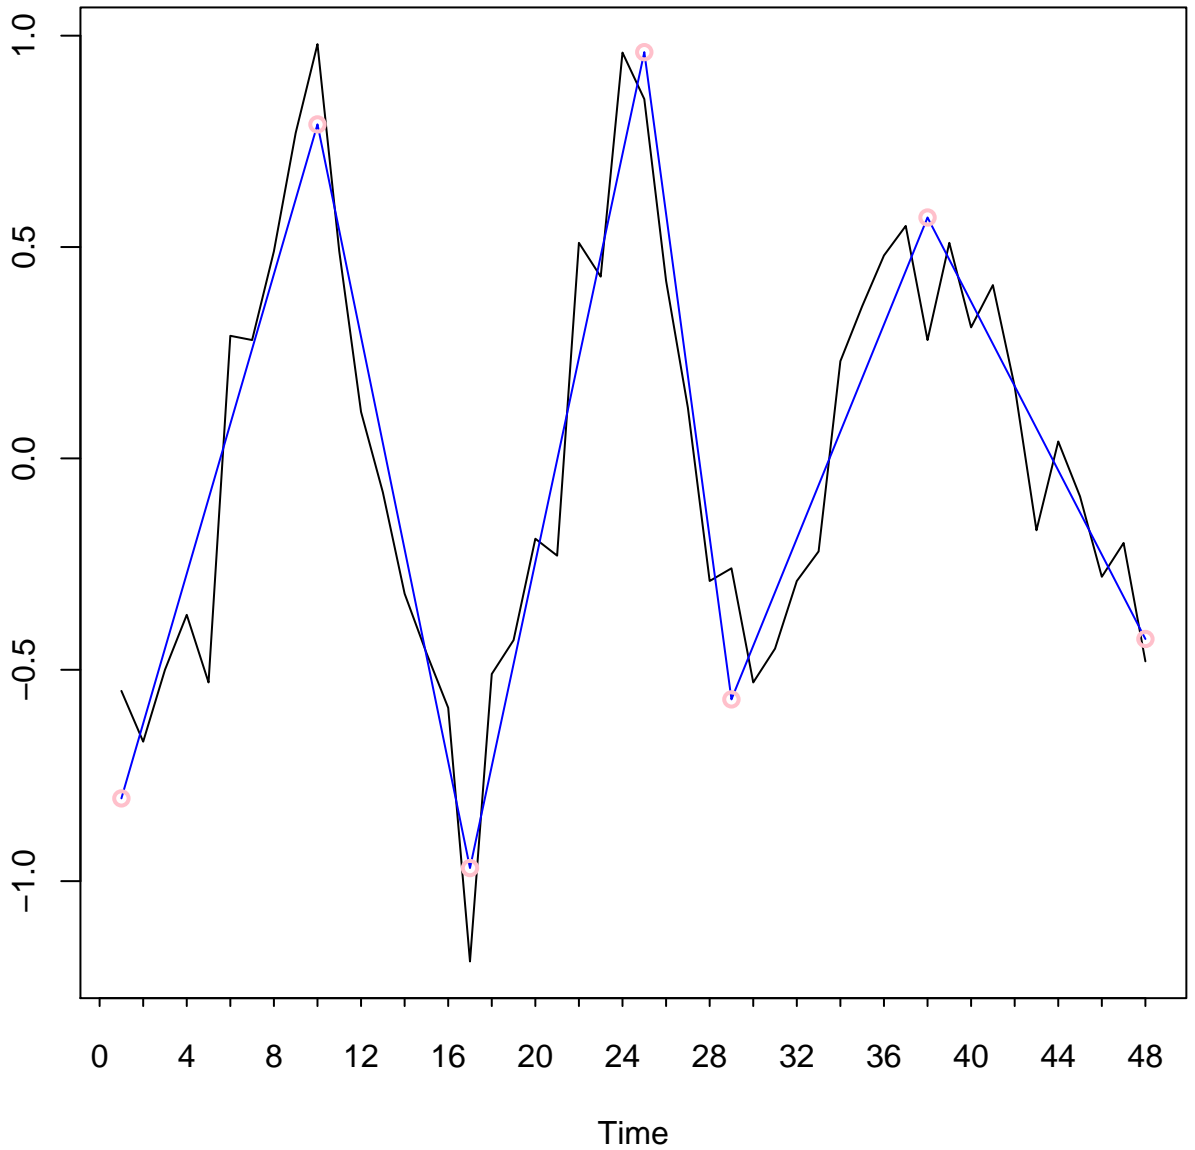

# CKS1

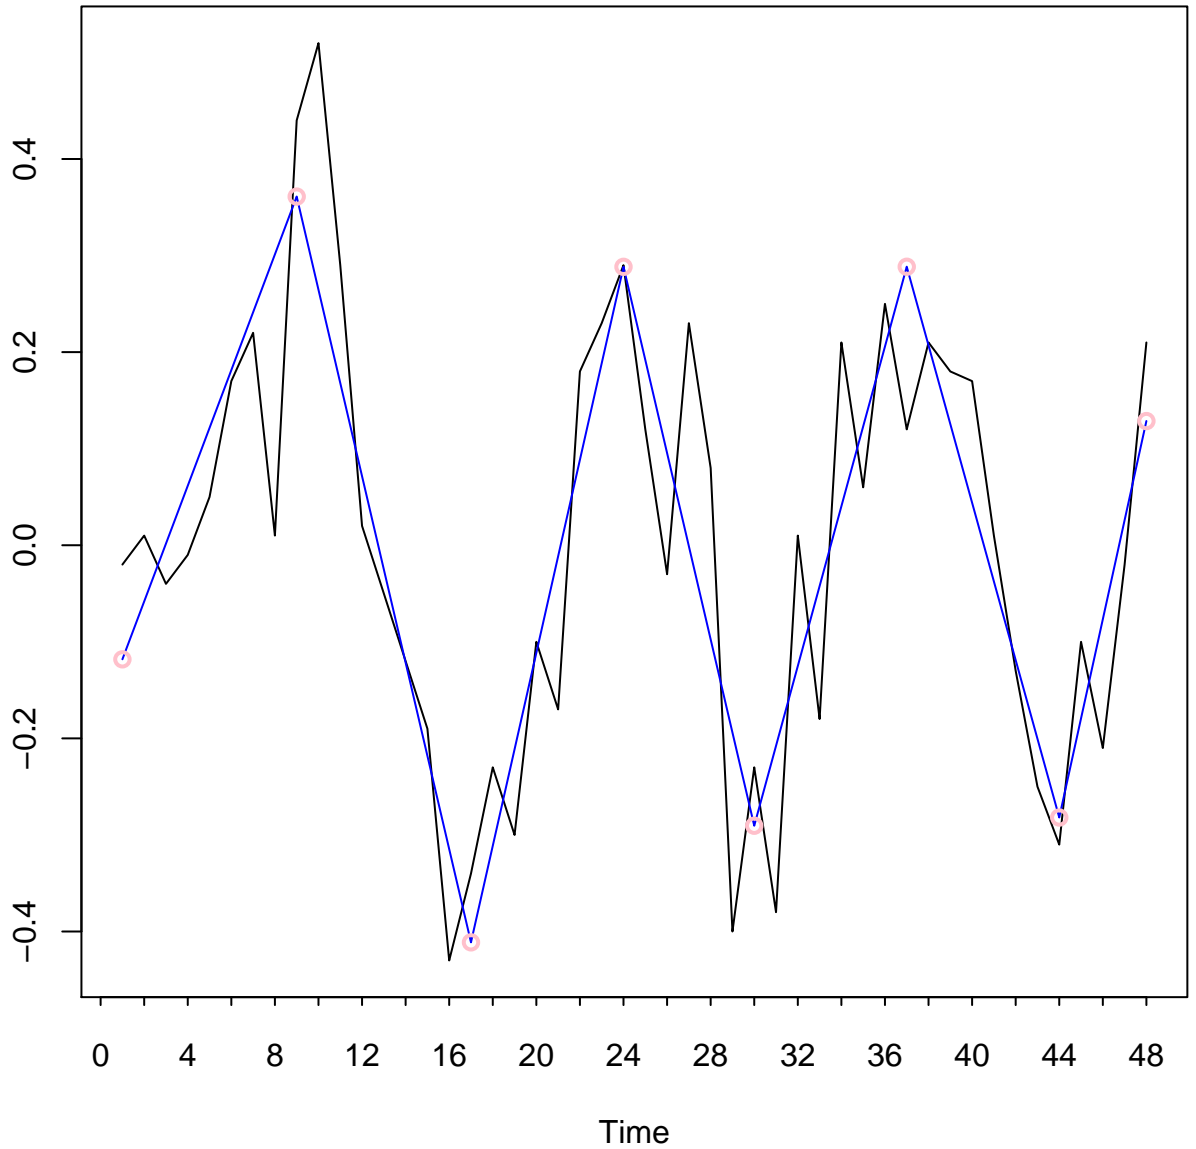

# CKS1\_N53308

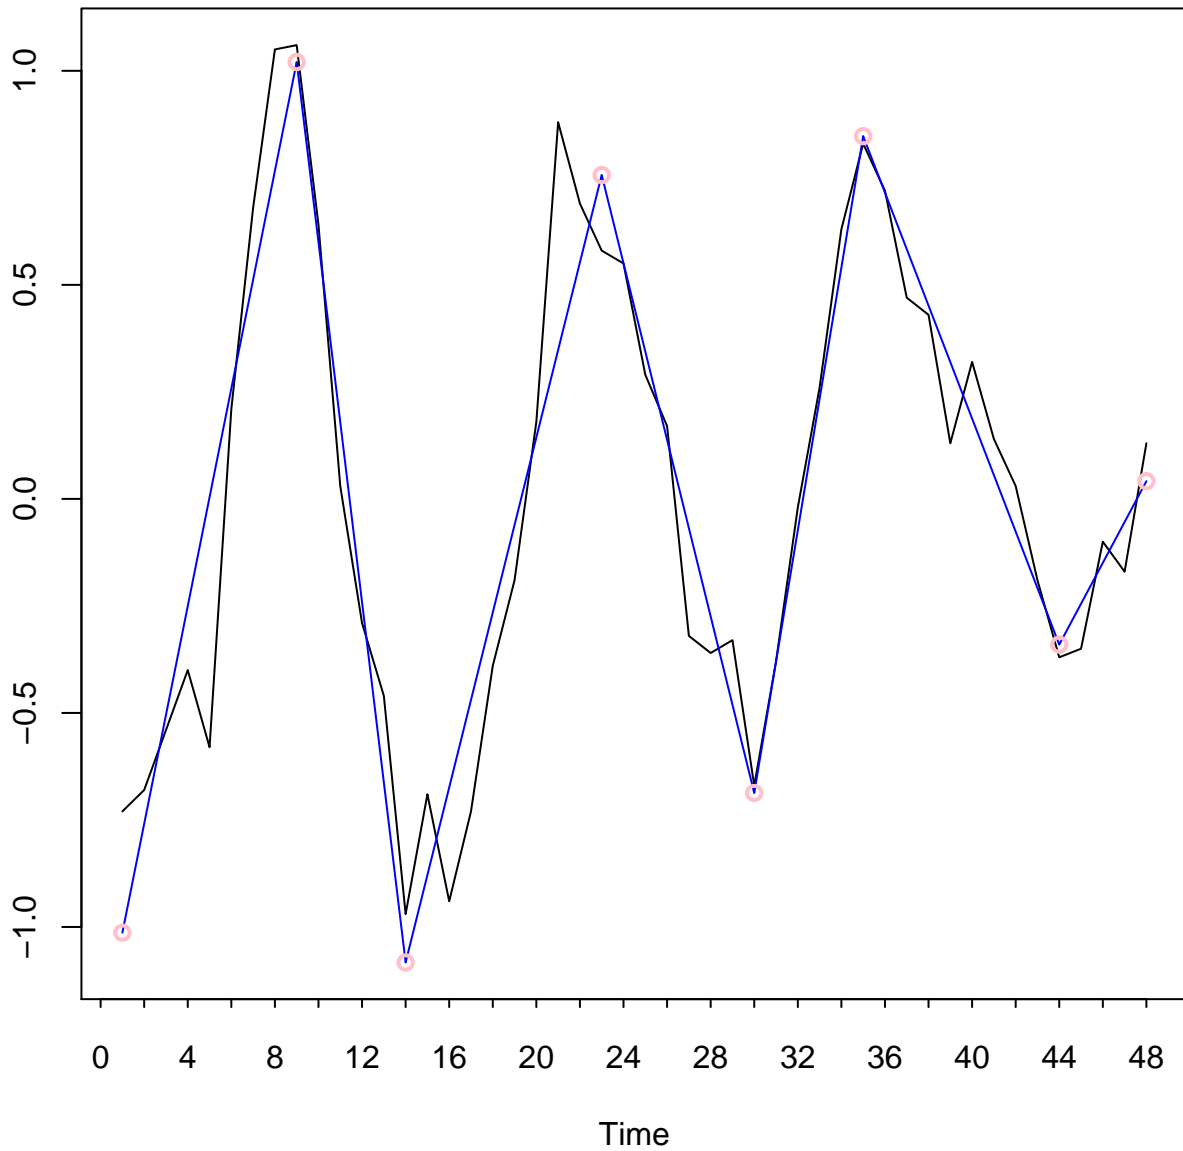



# CKS2\_AA010065

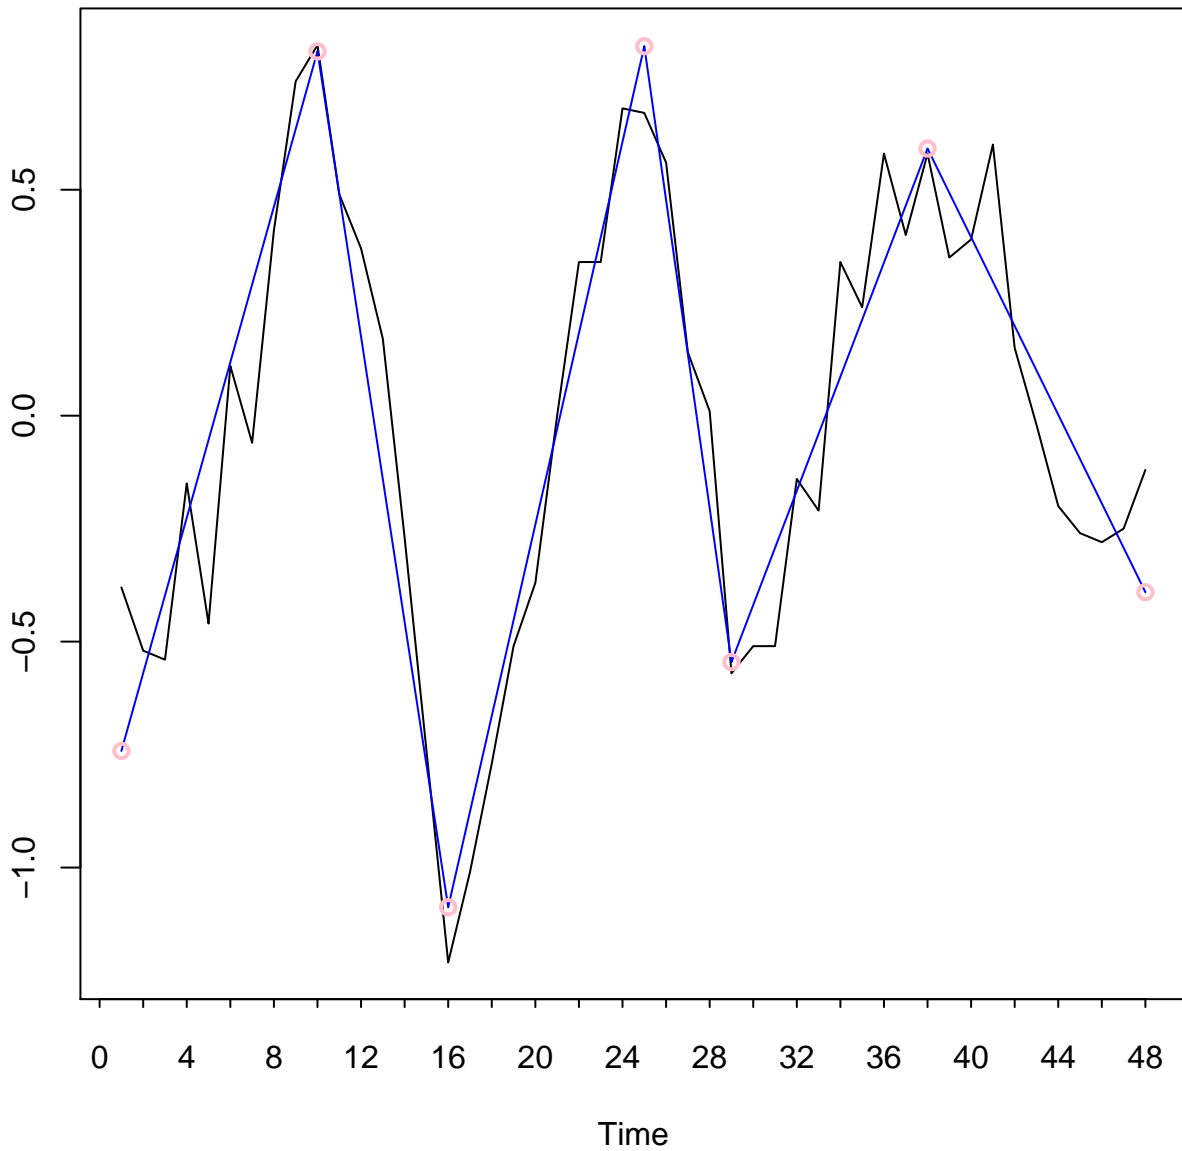

# CKS2\_AA292964

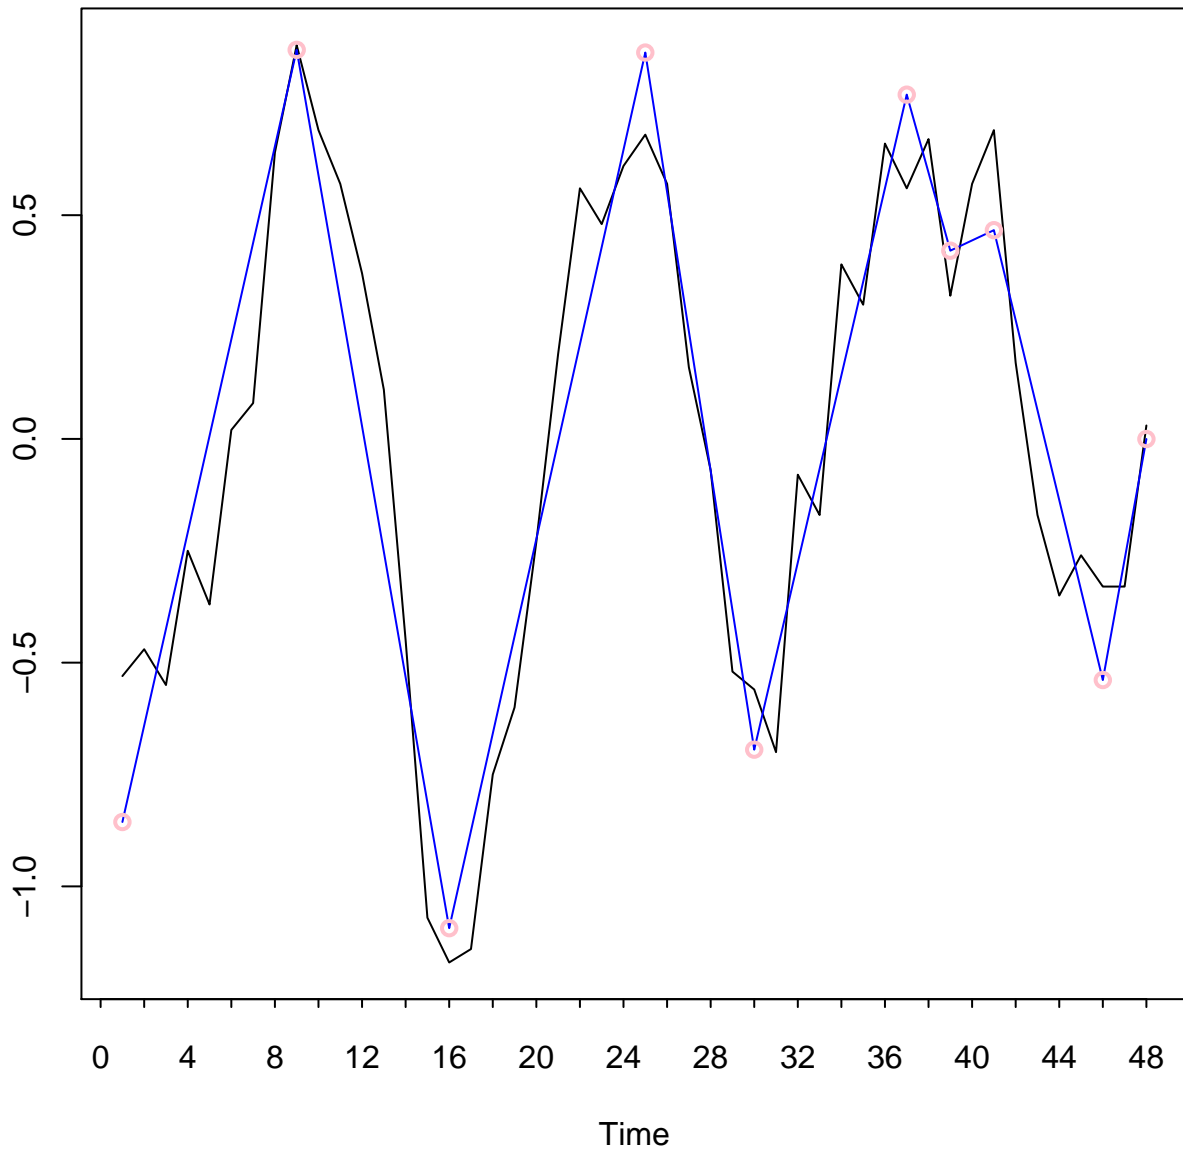

# STK15\_H63492

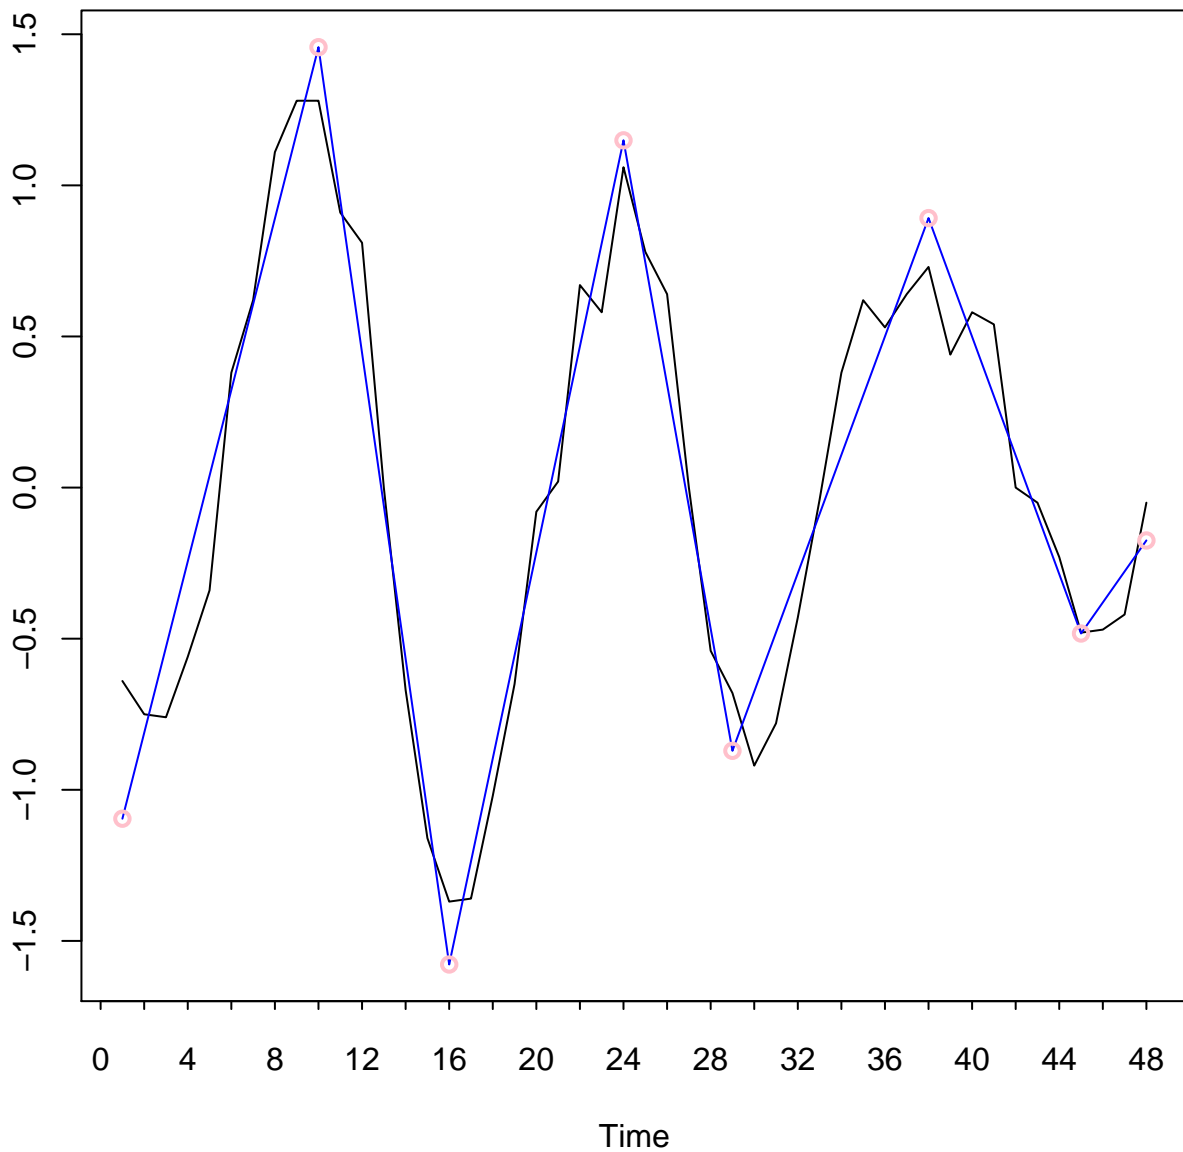

# STK15\_R19158

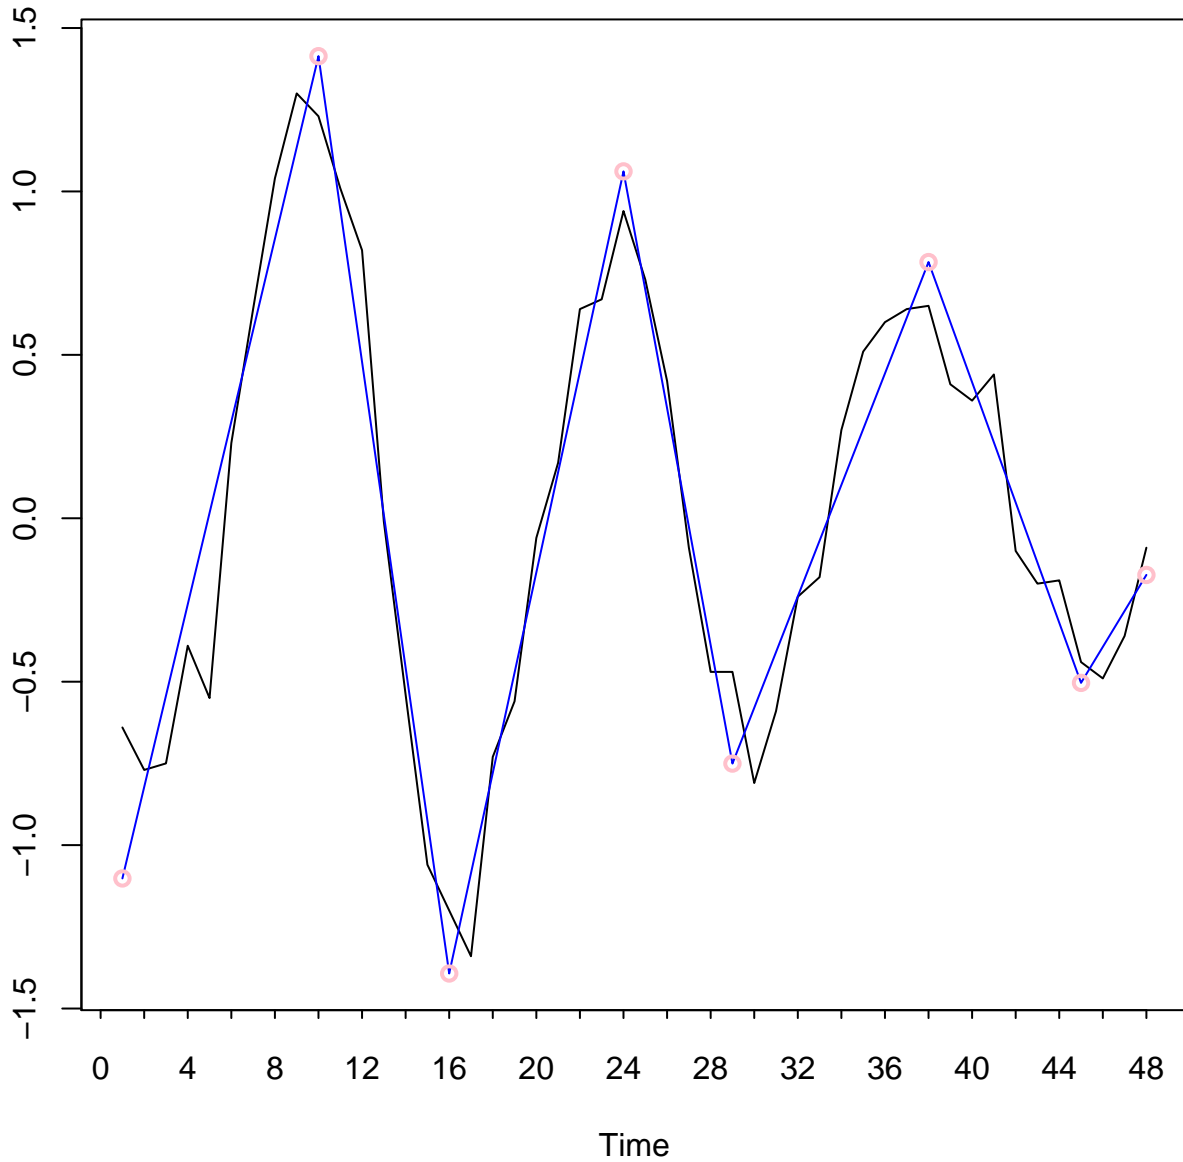

# CCNB1

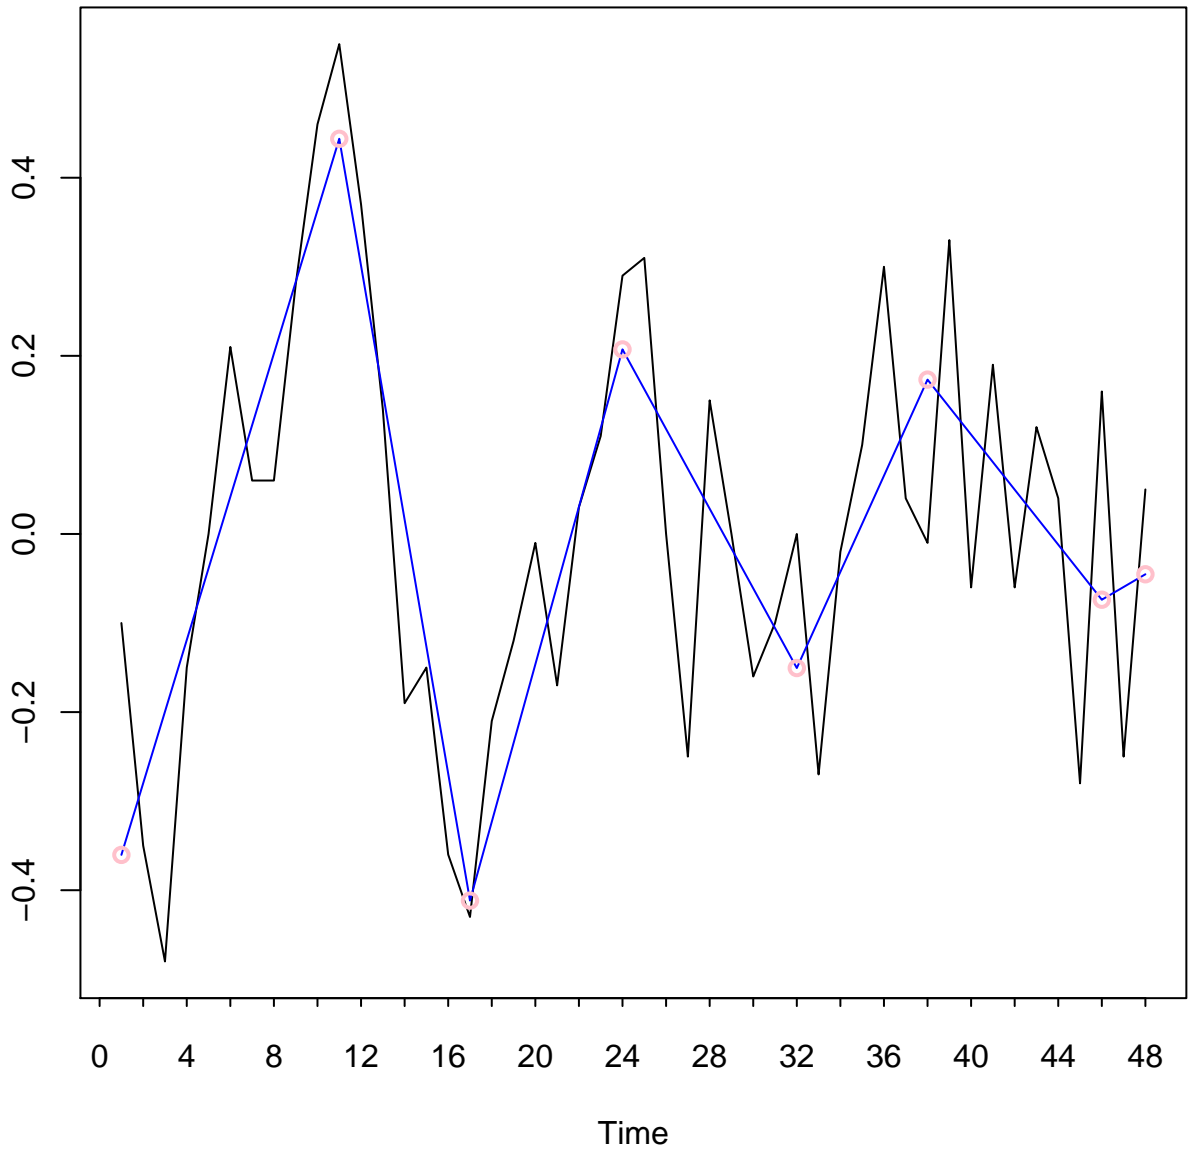

# CDC20

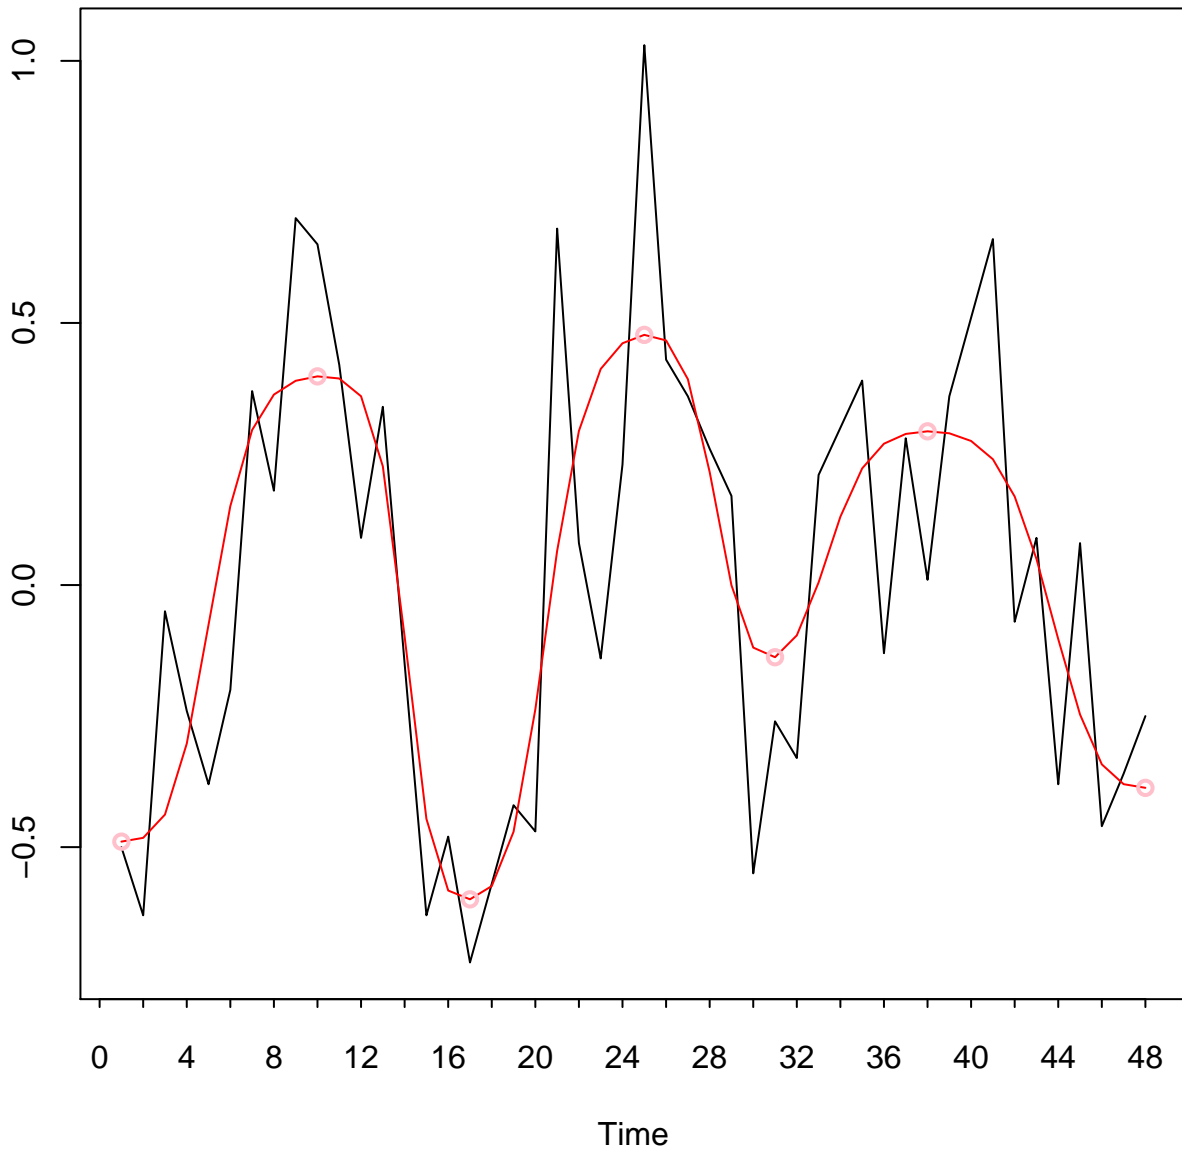

# CDC27\_T81764

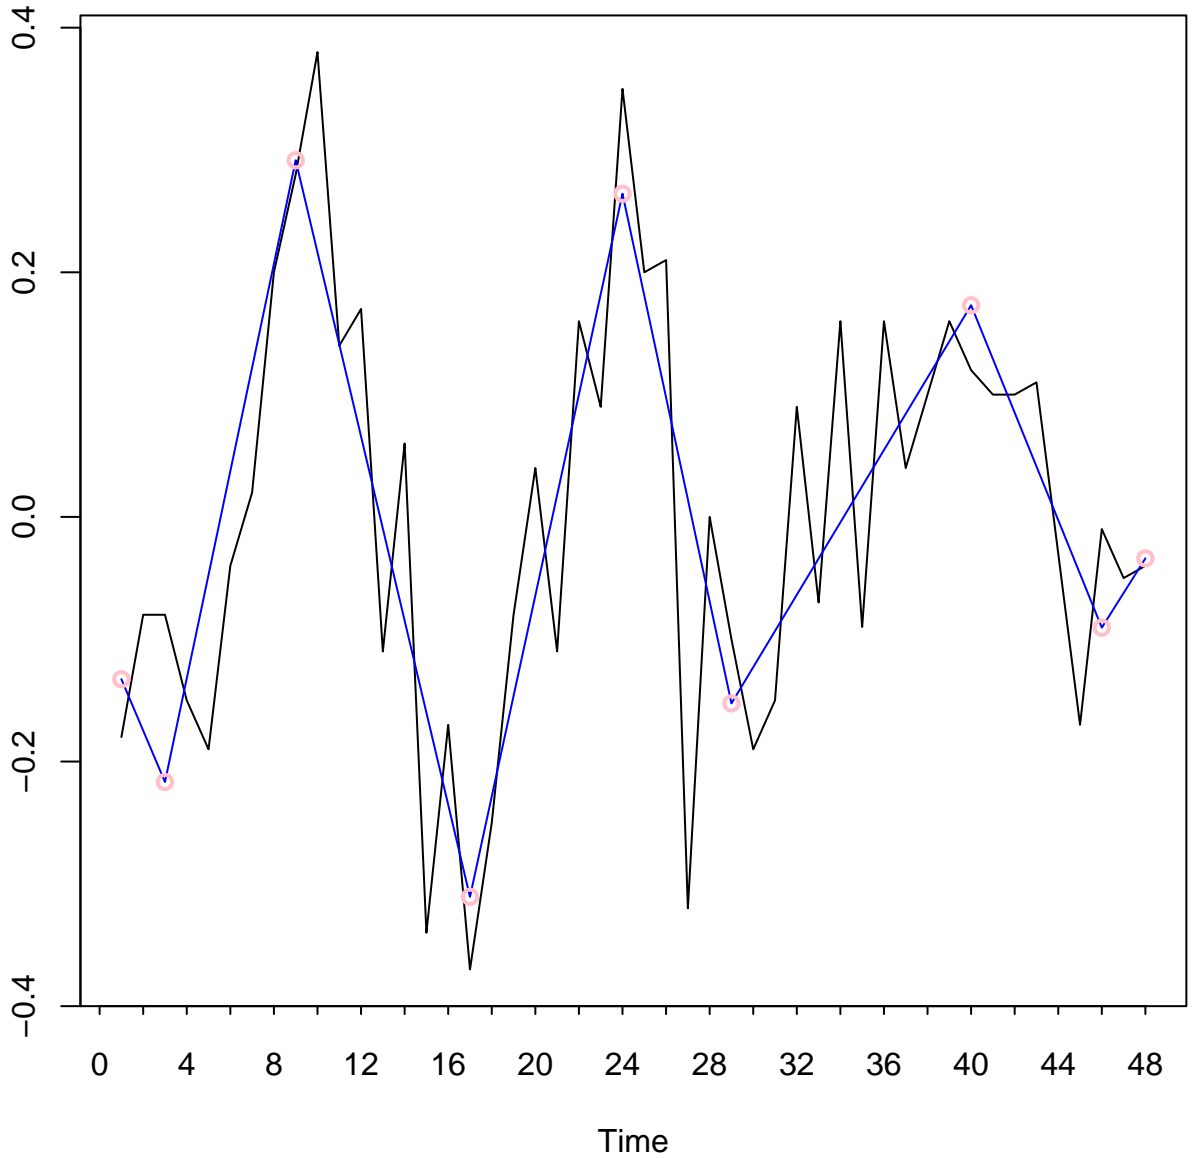

# CDC28/cdc2\_T77758

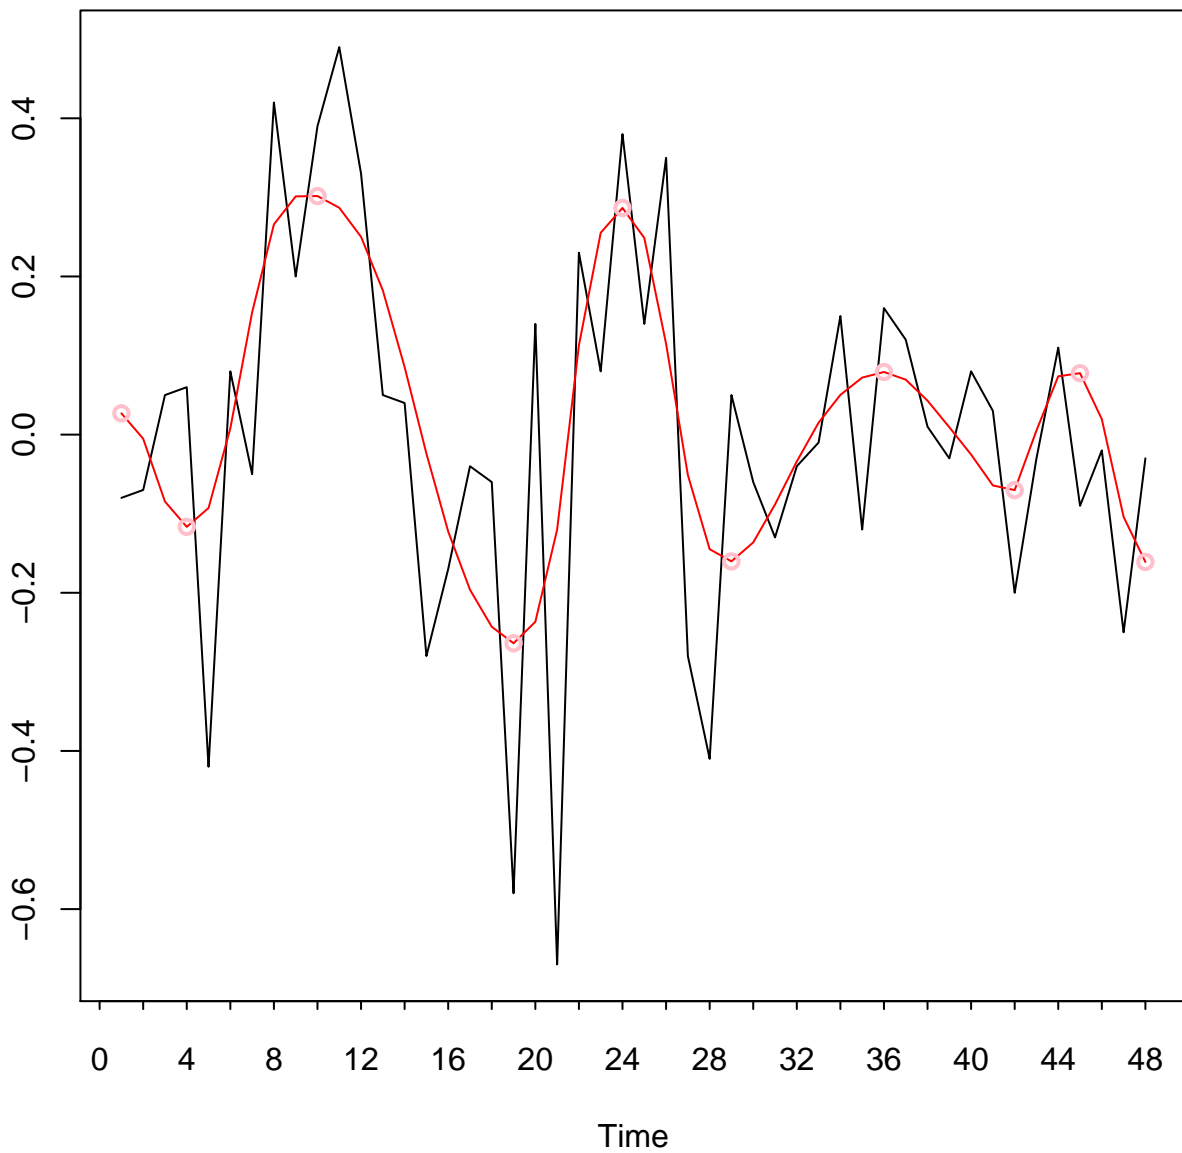



# PLK

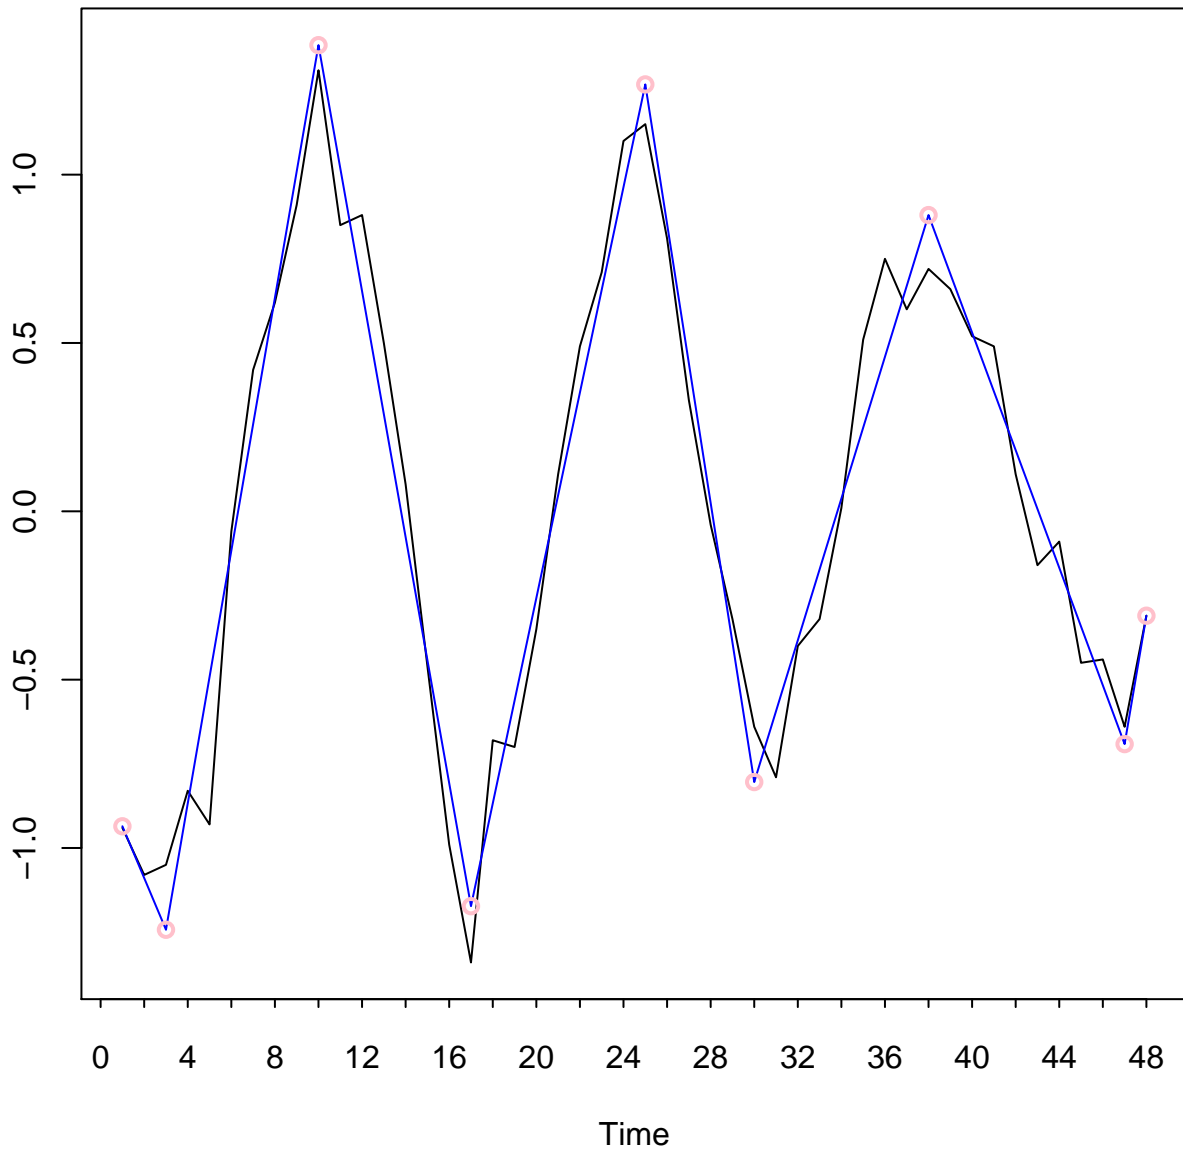

# BUB1

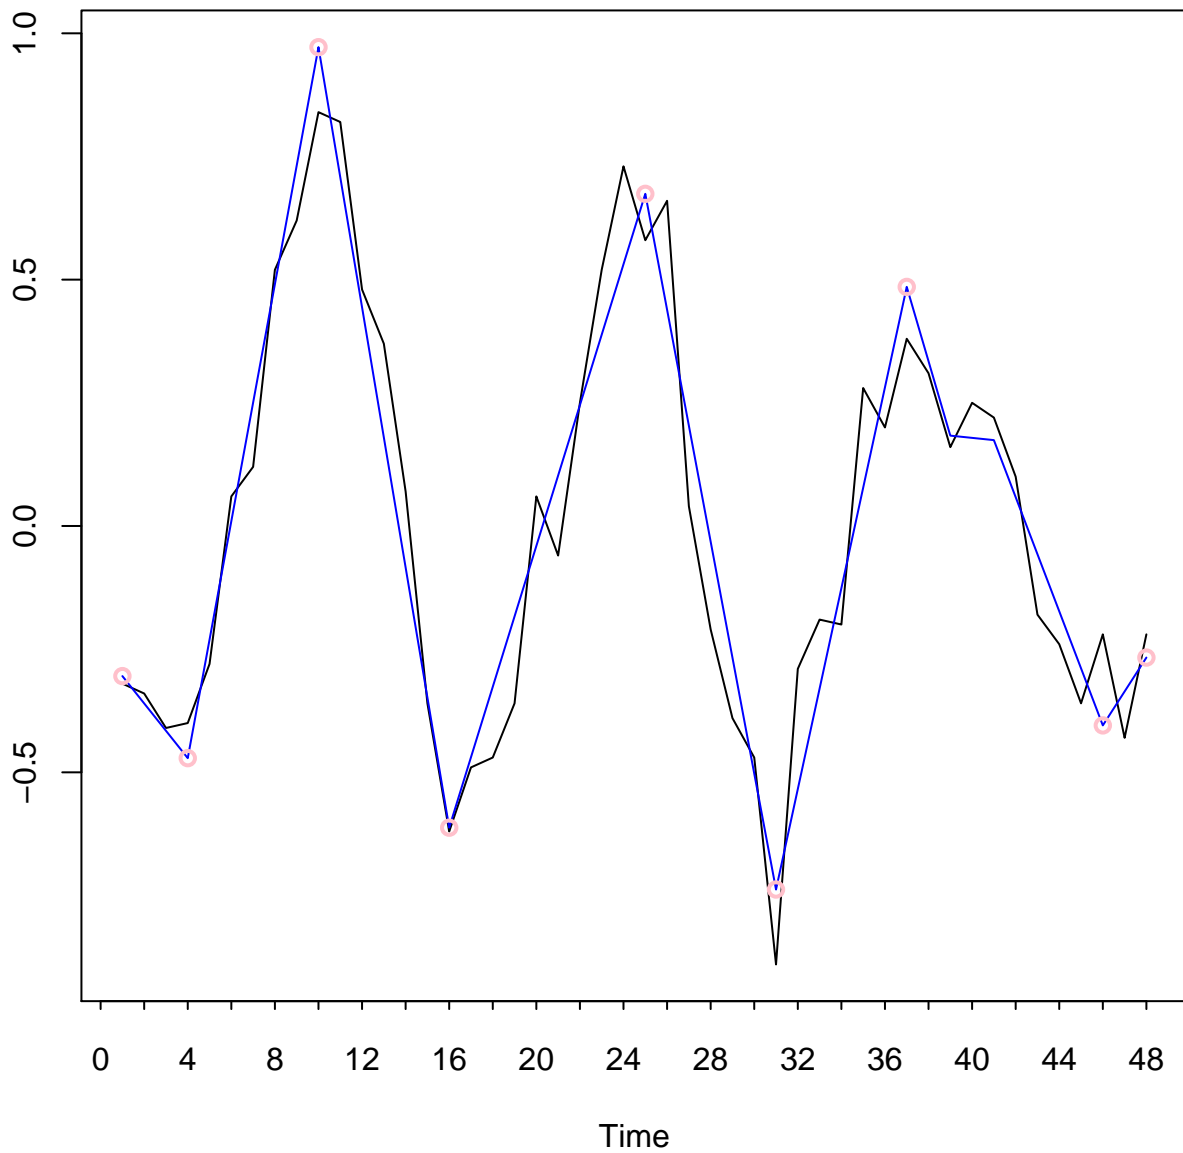

# CCNA2

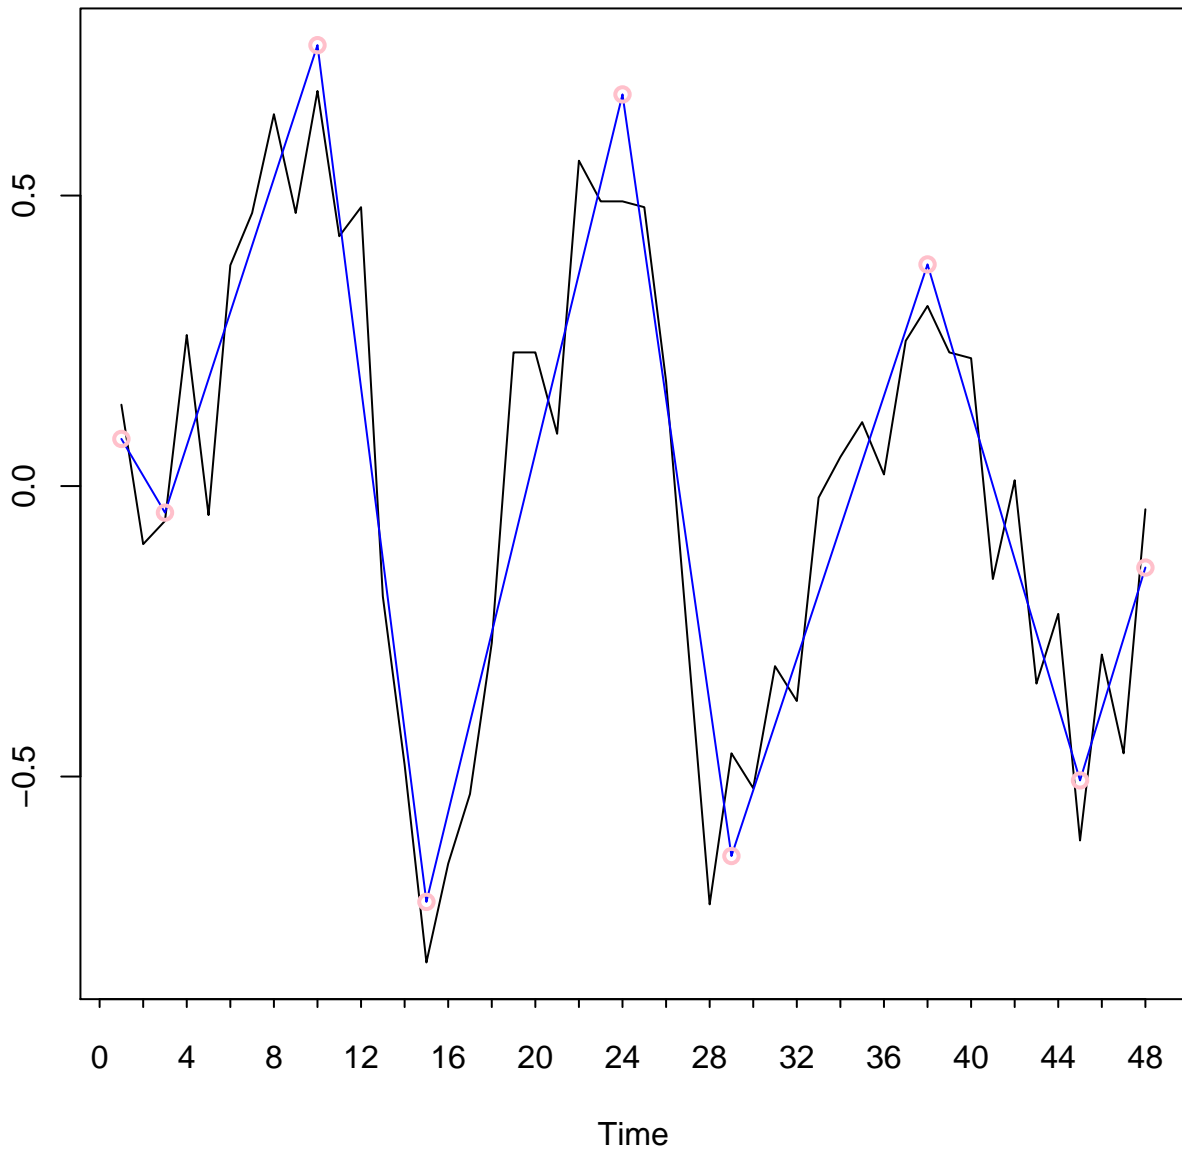

# CDC25B\_AA448659

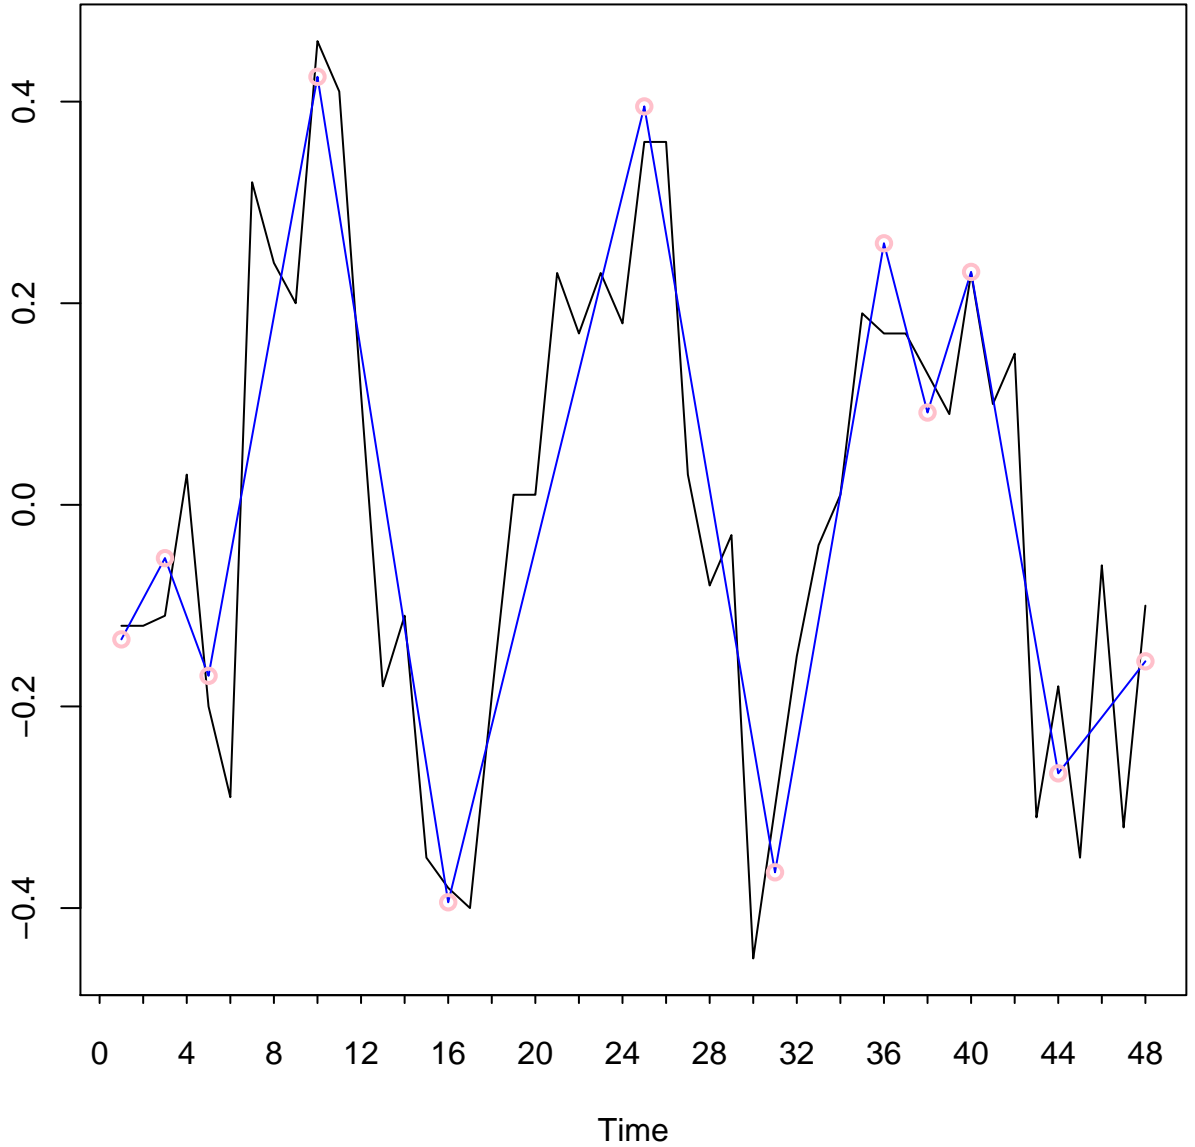

# CDC25B\_H14392

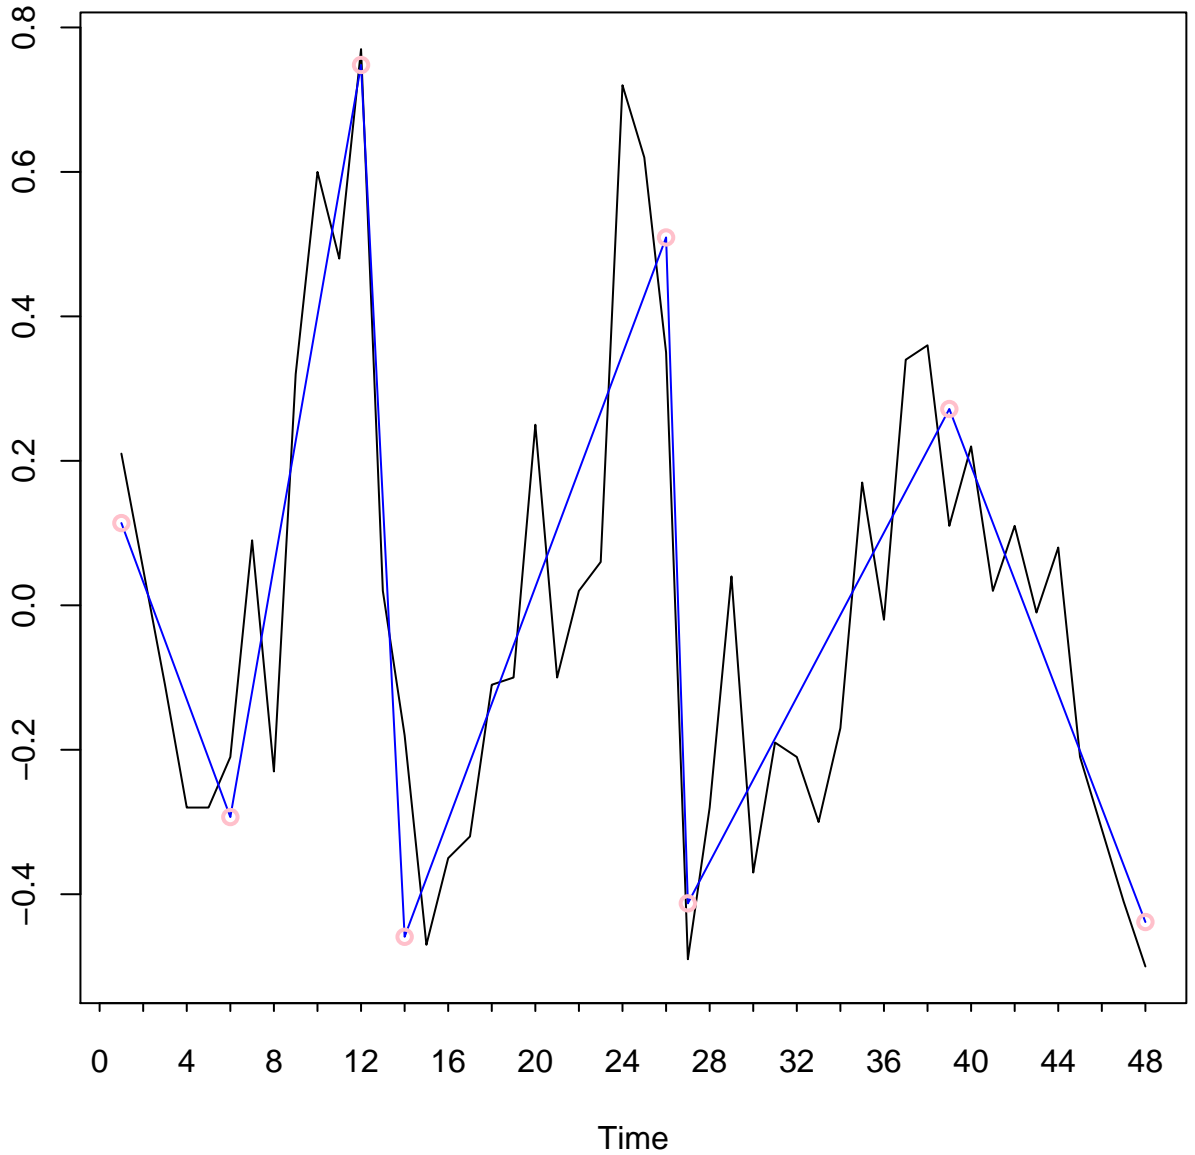

# E2F5

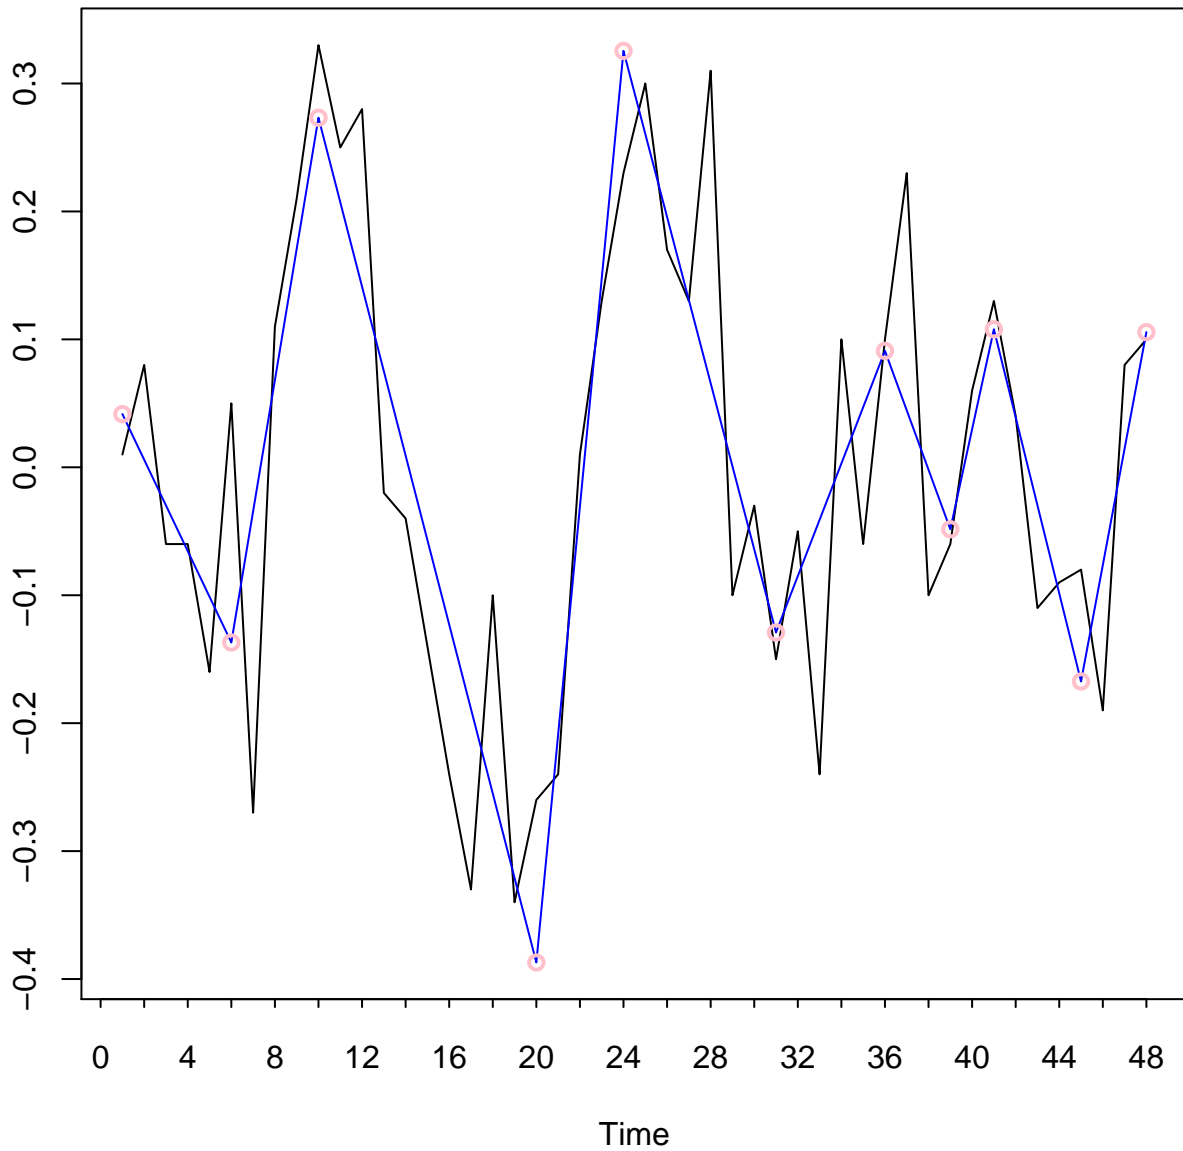

# NASP

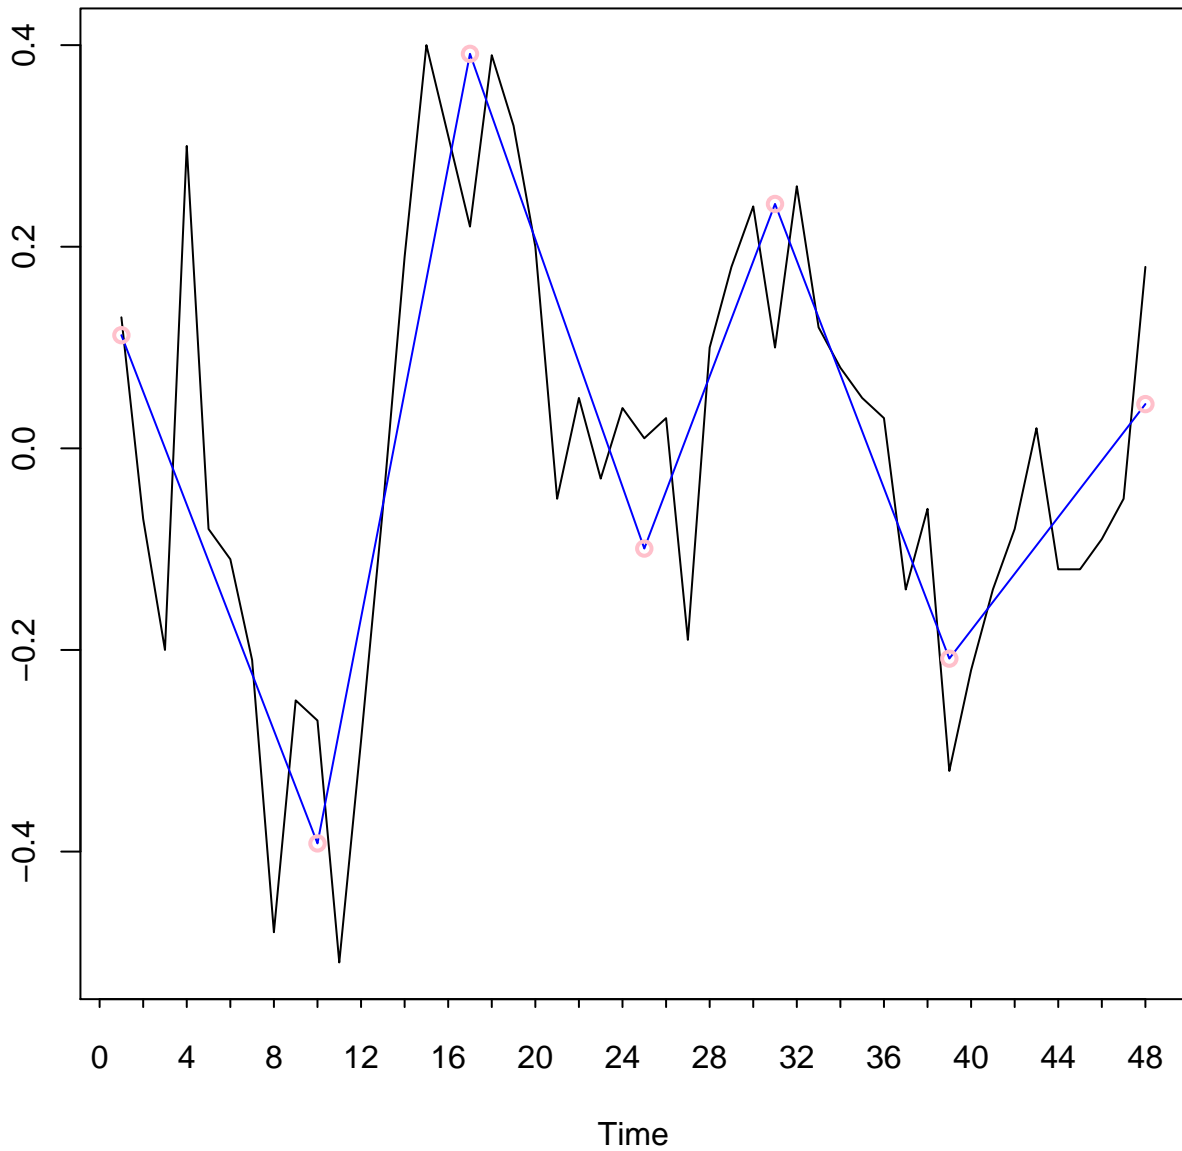

# MCM6\_AA663995

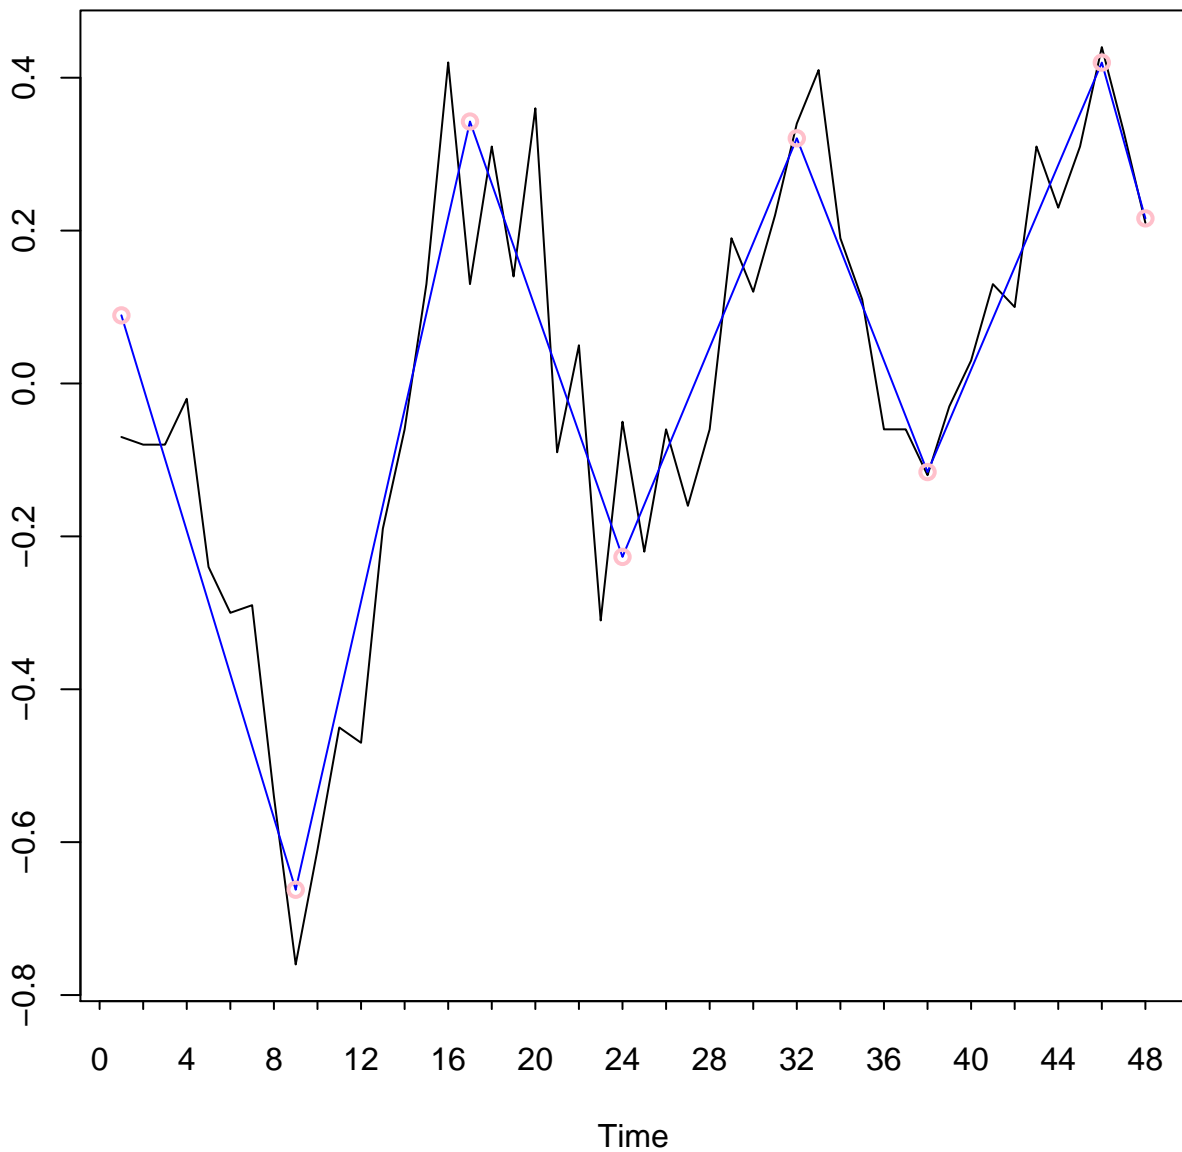



# SLBP

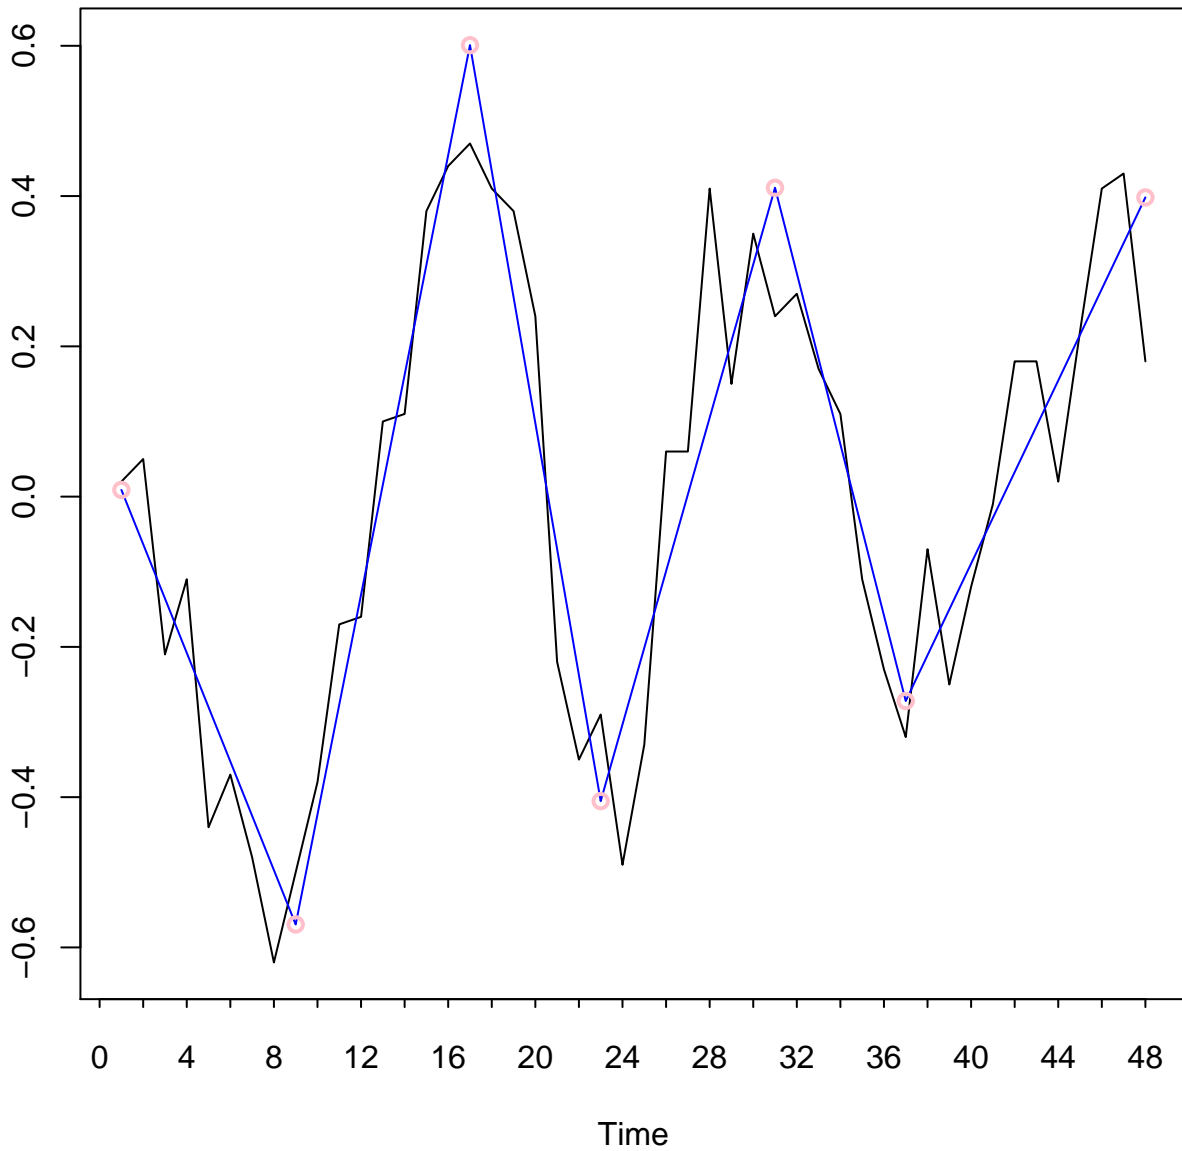

# MCM6\_AA976533

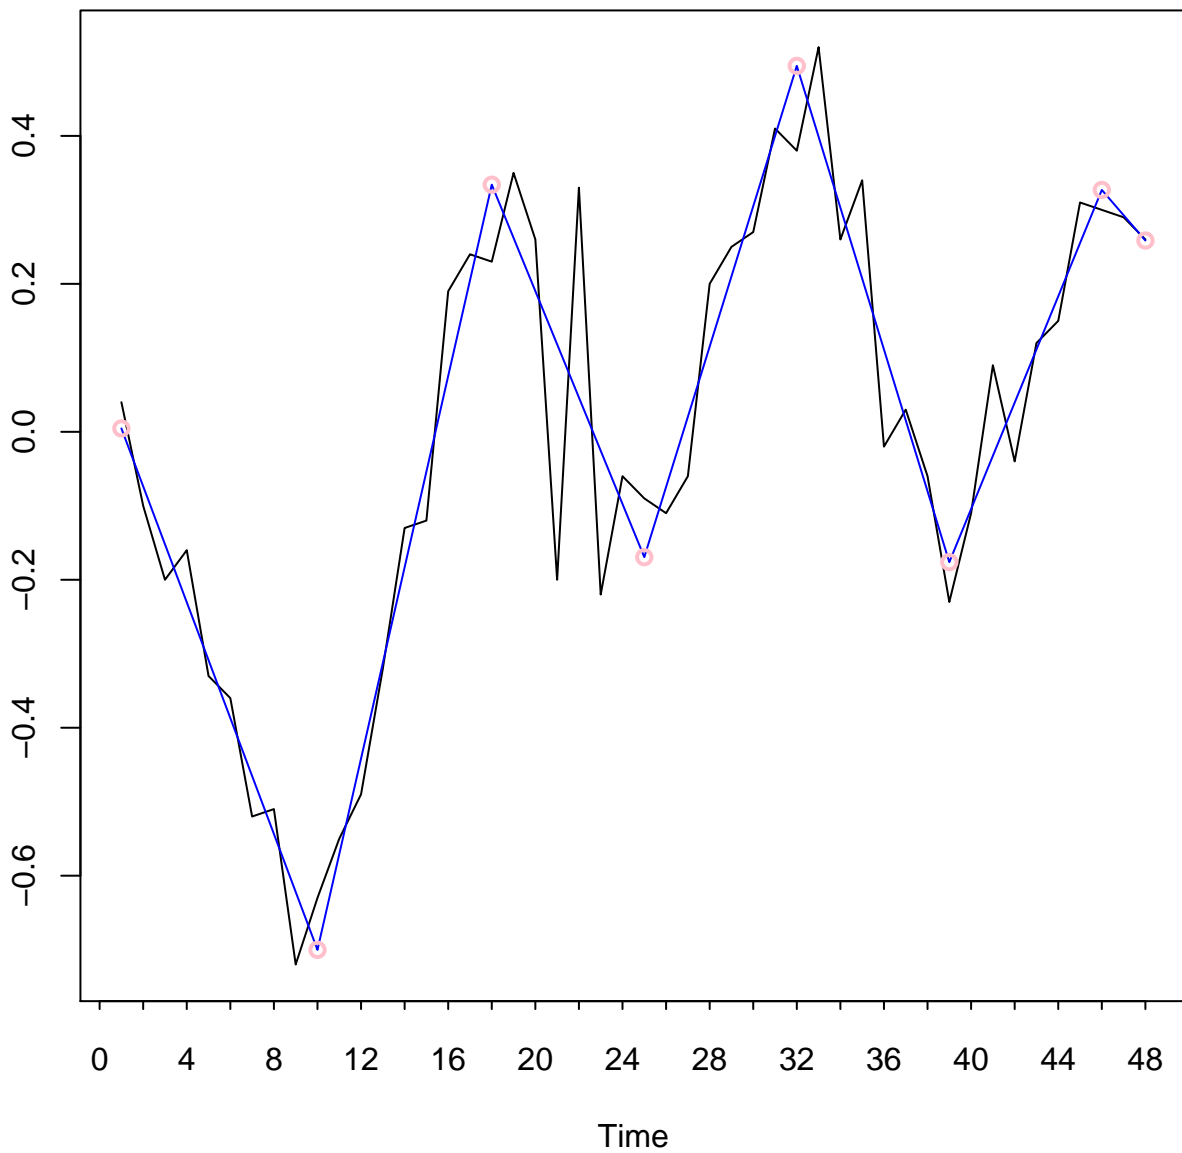

# MCM6\_N59689

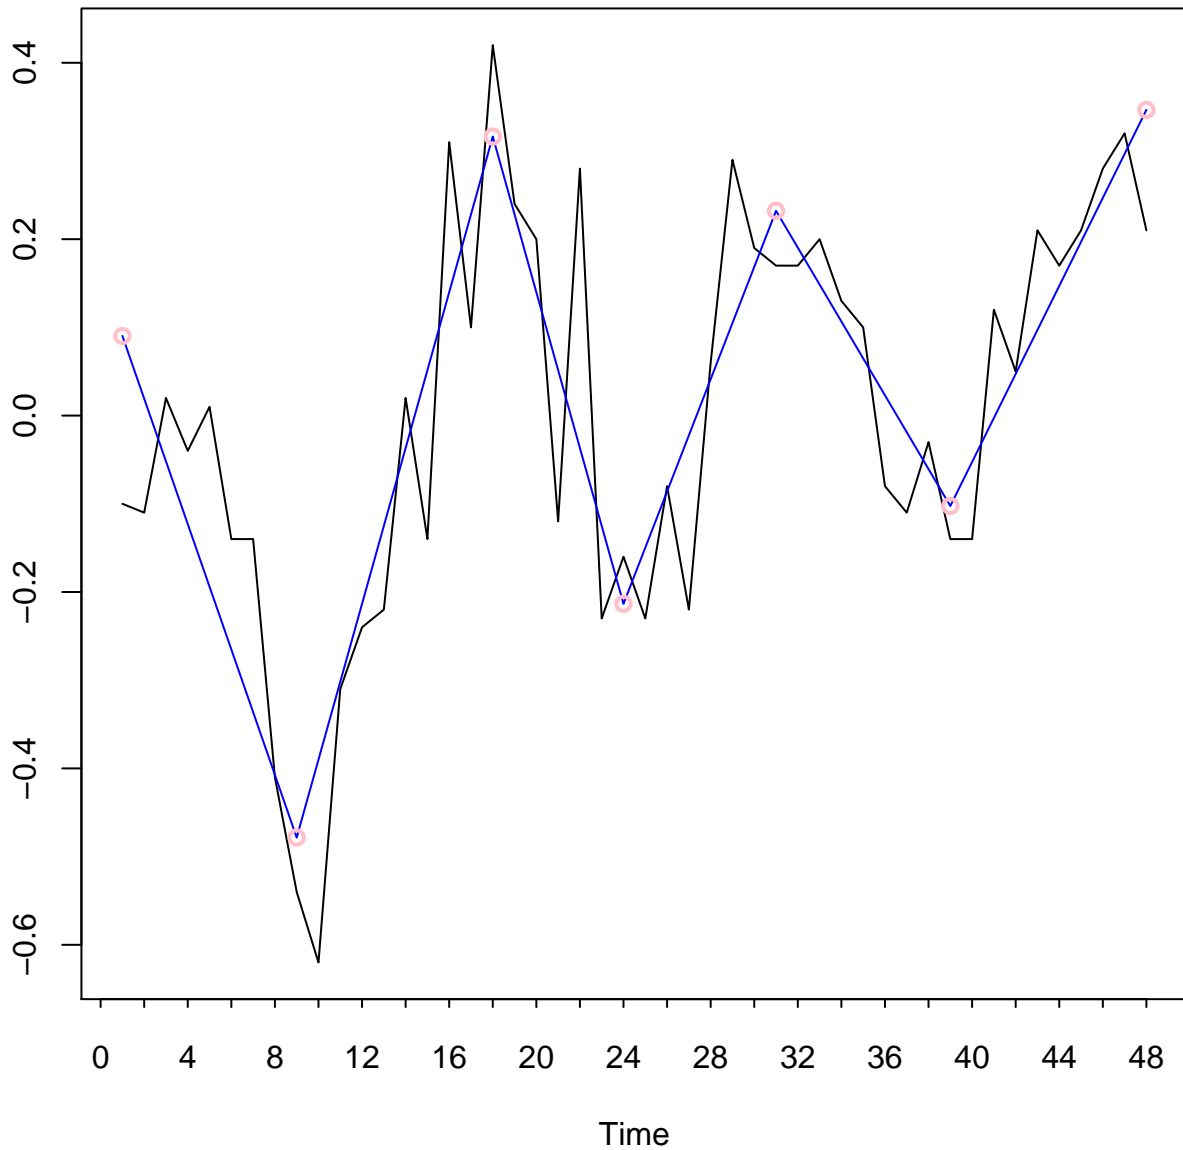

# MSH2\_AA219061

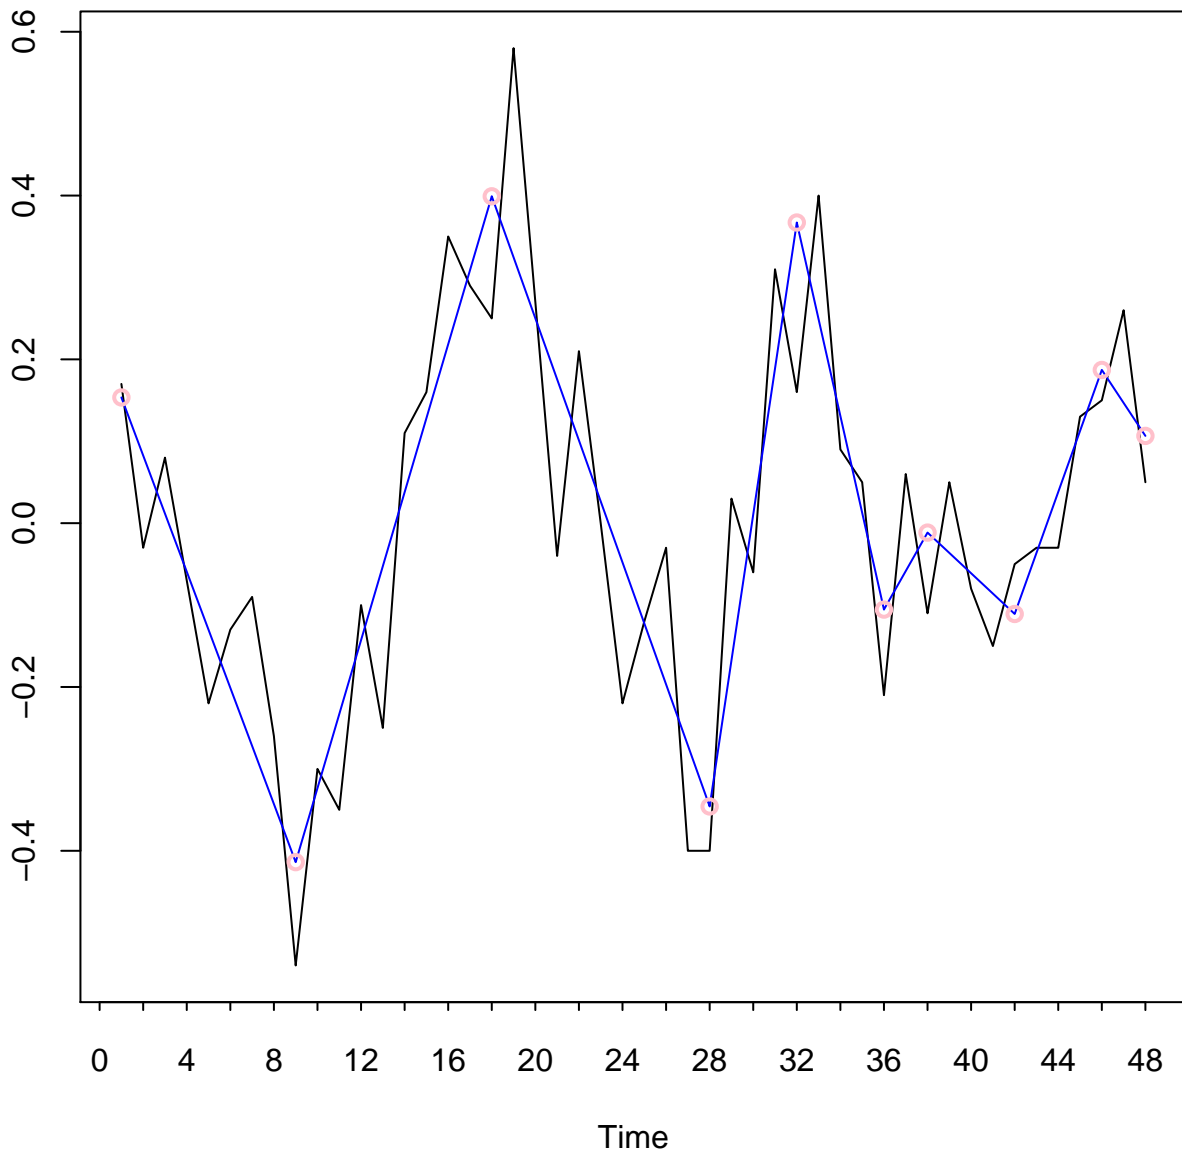

# MSH2\_AI792246

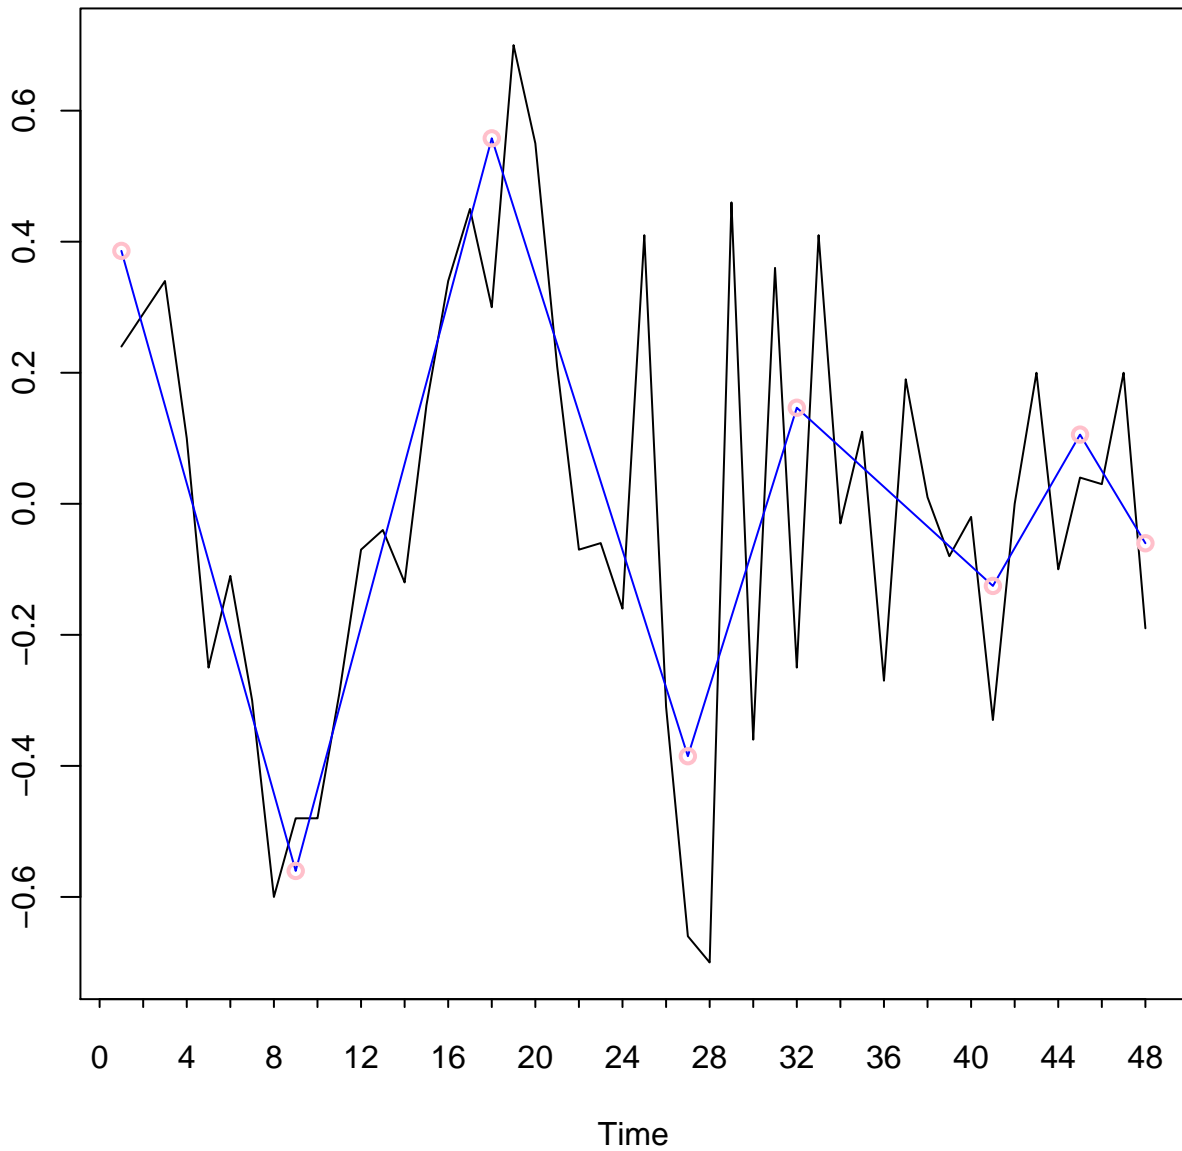

# CDKN2C

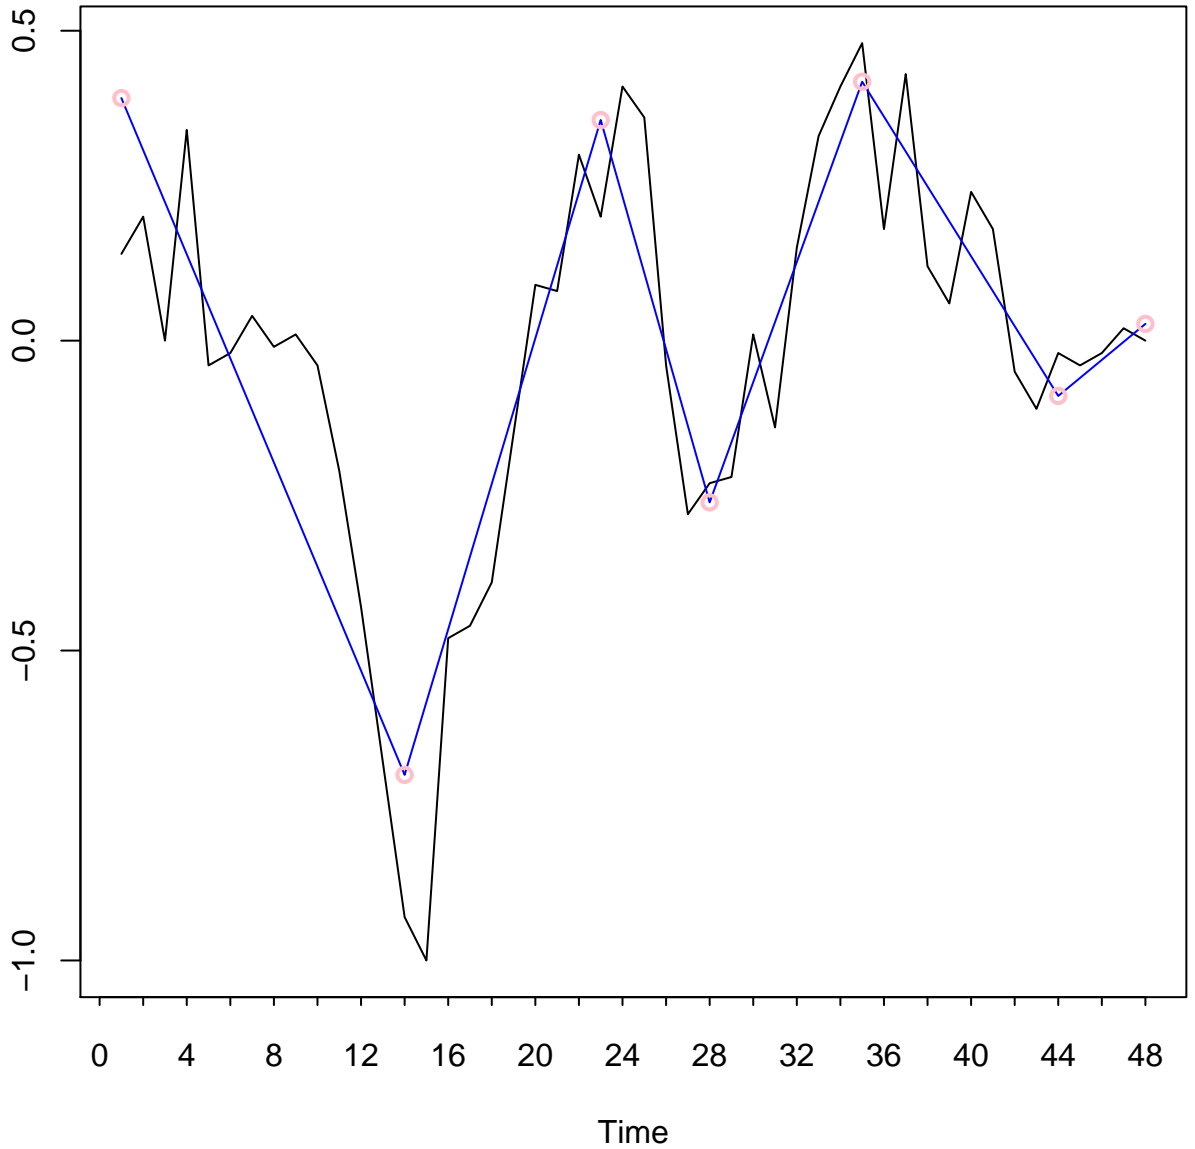

# HDAC3\_H88588

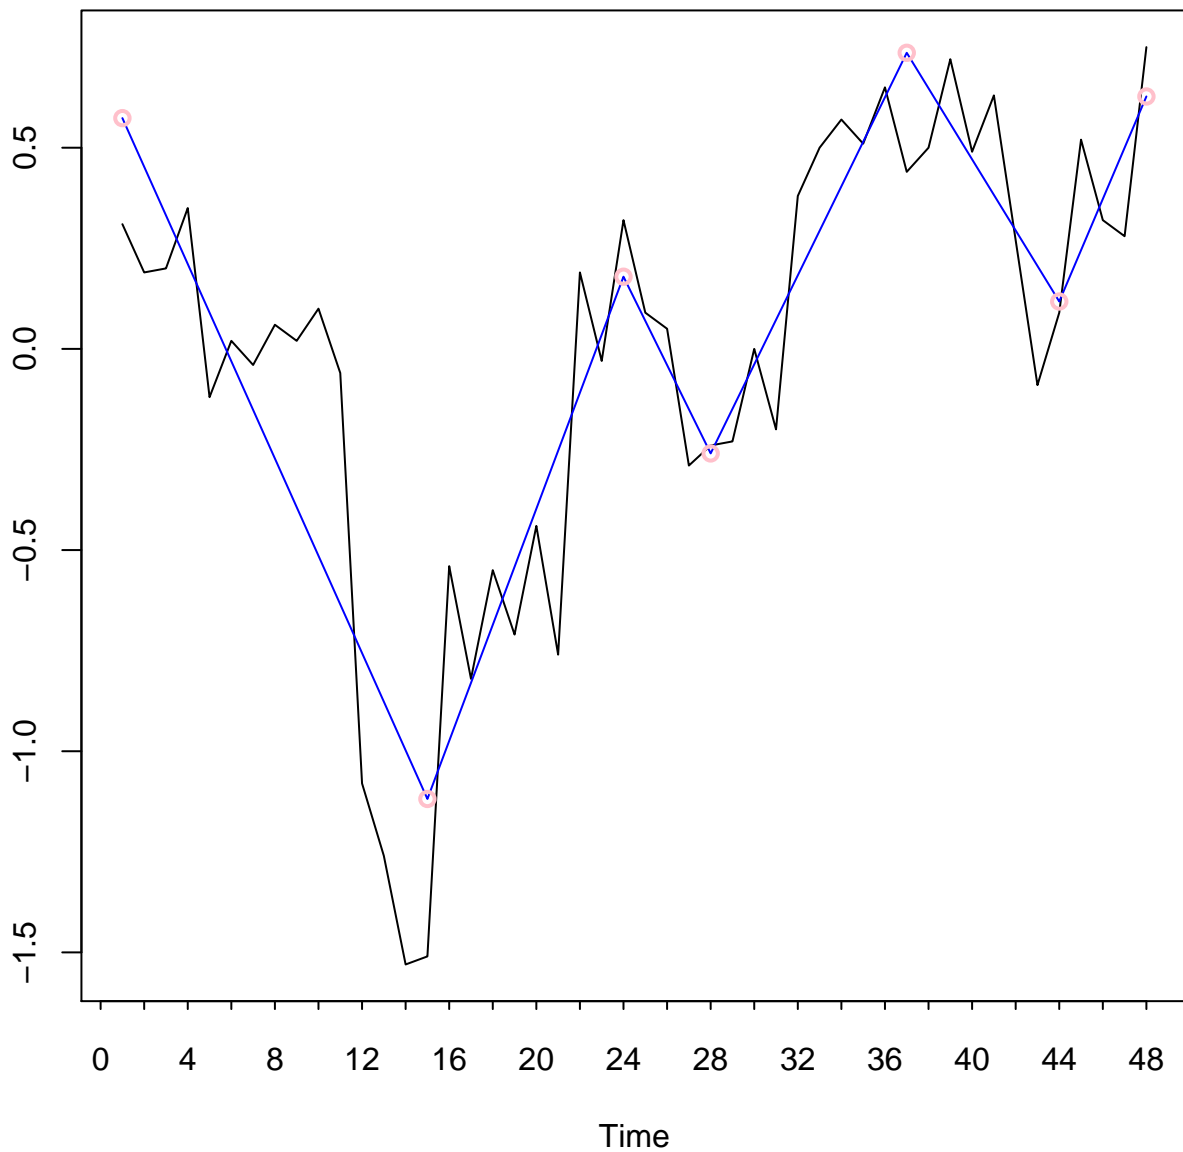

# NUCKS

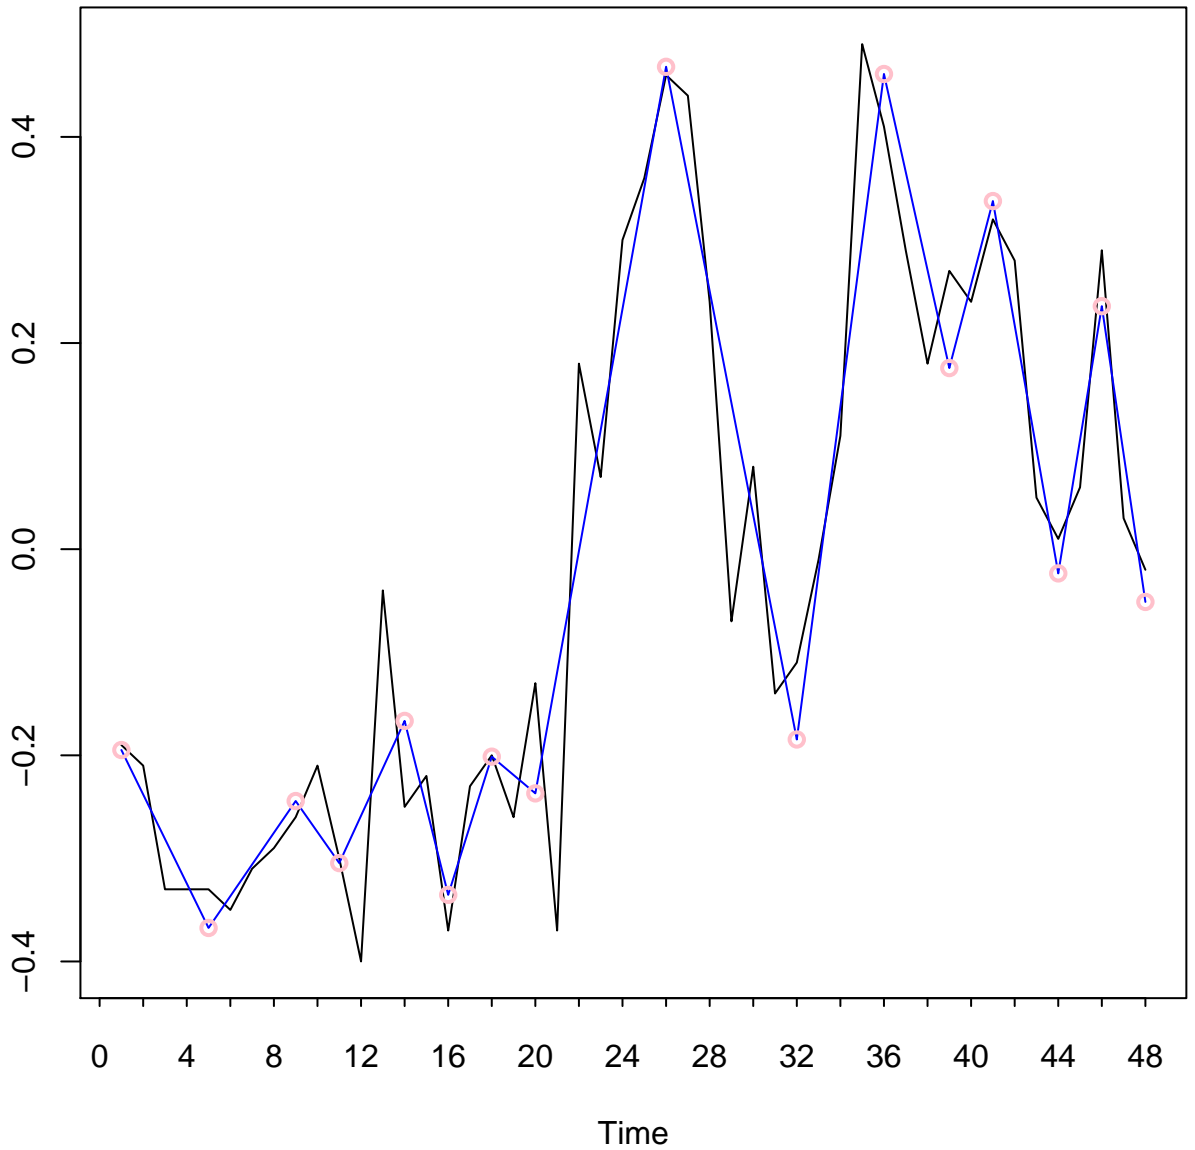



# NUCKS\_AI053436

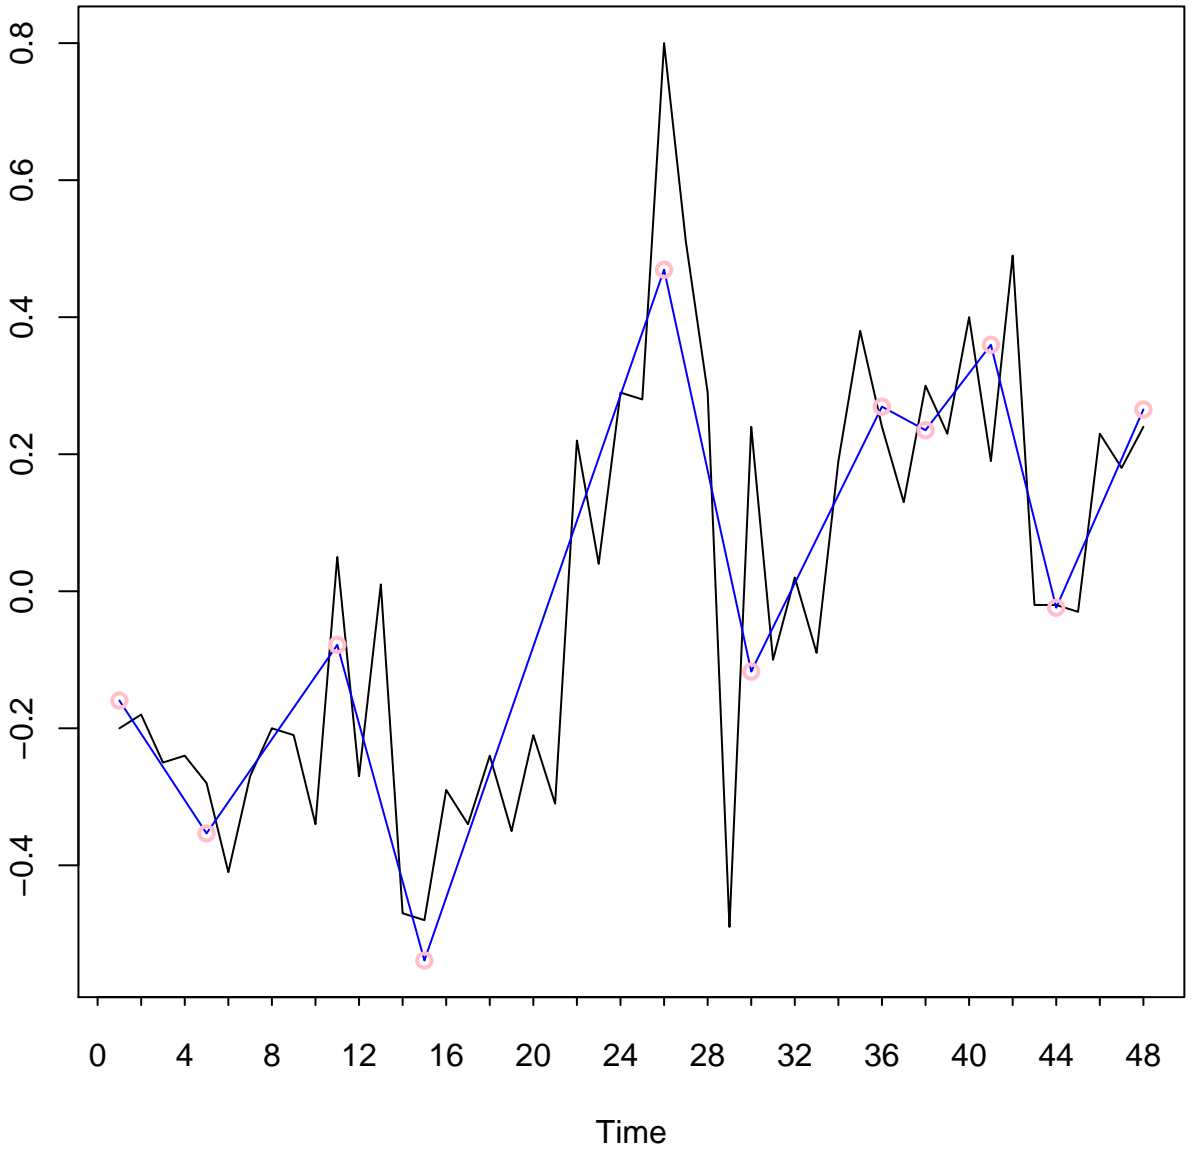

# NUCKS\_AA927182

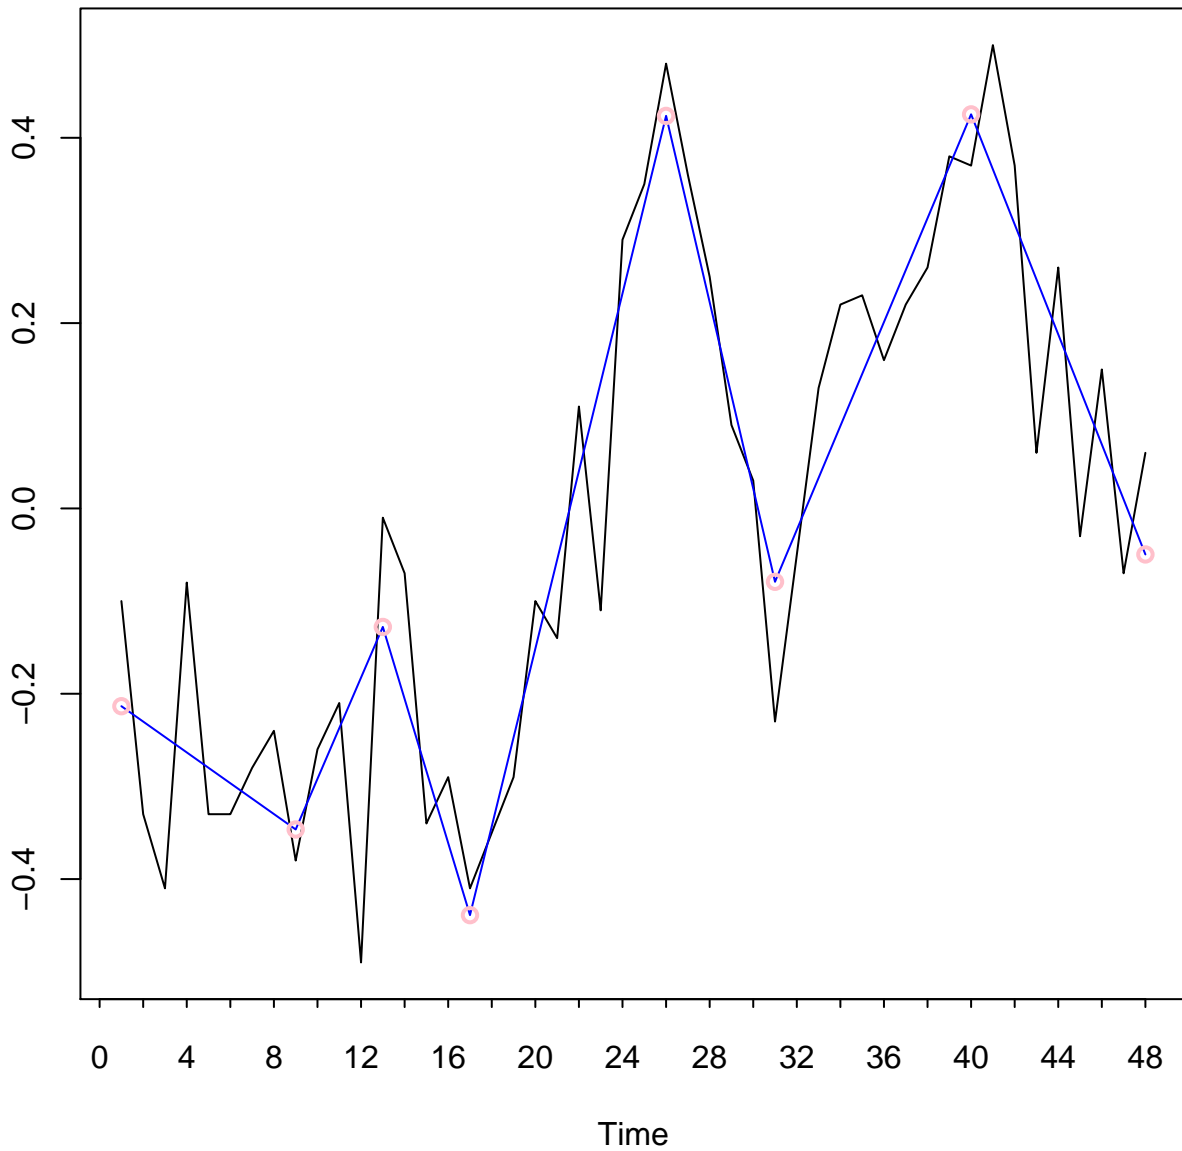

Supplement: 12859_2016_1391_MOESM2_ESM.pdf [file 12859_2016_1391_MOESM2_ESM.pdf]
