# Supplementary material for: SwitchFinder – a novel method and query facility for discovering dynamic gene expression patterns
Source: PubMed Central journal article supplement (PMC5160026; doi:10.1186/s12859-016-1391-0), 2016-12-15
Supplement: 12859_2016_1391_MOESM4_ESM.pdf [file 12859_2016_1391_MOESM4_ESM.pdf]

## Supplementary Table 1

| A INDUCED_IMMEDIATELY                                                                                                                                                                                                                                                           |                                                                                                                                                                                                                       |
|---------------------------------------------------------------------------------------------------------------------------------------------------------------------------------------------------------------------------------------------------------------------------------|-----------------------------------------------------------------------------------------------------------------------------------------------------------------------------------------------------------------------|
| BACH2, BATF2, CREM, CSRN3, DACH1, EBF1, EGR1/2/3, FOS, FOXC1, GATA6, HES1, HEY1, HIC1, HIF1A, HOXD1/3/8/9/10/13, KDM5B(JARID1B), KLF12, LEF1, MAFB, NCOA3/7, NKX3-1, NR0B1, PBX1, PPARG/D, RARA, SMAD3, SOX4/8/9, TBX2/3, TEAD2, TLE3, TLX2, TULP4, ZFP2, ZNF71/135/436/606/641 | GO:0003700 sequence-specific DNA binding transcription factor activity; GO:0006355 regulation of transcription, DNA-templated; GO:0030154 cell differentiation                                                        |
| AKR1C1/3, BCDO2, CRABP2, CYP26A1/B1, DHRS3, RARA, RBP1, RDH10, SDC4, SP100, STRA6, PPAR/D/G                                                                                                                                                                                     | GO:0001523 retinoid metabolic process; GO:0042573 retinoic acid metabolic process; GO:0001972 retinoic acid binding; GO:0032526 response to retinoic acid                                                             |
| BMP4, EGR1, GREM2, LEF1                                                                                                                                                                                                                                                         | GO:0030509 BMP signaling pathway                                                                                                                                                                                      |
| DACT3, LEF1, PSEN1, SOX4                                                                                                                                                                                                                                                        | GO:0016055 Wnt signaling pathway                                                                                                                                                                                      |
| FOXC1, HES1, HEY1, HIF1A, MDK, NCOR2, PSEN1, TLE3                                                                                                                                                                                                                               | GO:0007219 Notch signaling pathway; GO:0005112 Notch binding                                                                                                                                                          |
| ERBB2, IRS2, KITLG, PDGFRA/B, SPRY2/4                                                                                                                                                                                                                                           | GO:0007173 epidermal growth factor receptor signaling                                                                                                                                                                 |
| PDGFRA/B, PLAT                                                                                                                                                                                                                                                                  | GO:0048008 platelet-derived growth factor receptor signaling pathway                                                                                                                                                  |
| NGFR, NTRK1, PCSK5, PLEKHG2, RALB, RIT1                                                                                                                                                                                                                                         | GO:0048011 neurotrophin TRK receptor signaling pathway; GO:0038180 nerve growth factor signaling pathway                                                                                                              |
| DISP1                                                                                                                                                                                                                                                                           | GO:0007224 smoothed signaling pathway; GO:0008158 hedgehog receptor activity; GO:0009880 embryonic pattern specification                                                                                              |
| APC2, EML4, KIFAP3, LYST, NEIL2, SPTAN1                                                                                                                                                                                                                                         | GO:0015630 microtubule cytoskeleton                                                                                                                                                                                   |
| AHNAK, ARPC1B, AVIL, CORO2A, CTTNBP2NL, FAM129B, FGD4/6, FHL2, FLNB, KALRN, LCP1, MYRIP, PDLIM5/7, PPP1R12B, SYNPO/2, TRIOBP, VCL                                                                                                                                               | GO:0015629 actin cytoskeleton                                                                                                                                                                                         |
| ARHGDI1, CLASP2, CNN2, LIMK1, NUA2, PAK1, PALM, PFN2, PLK2, RND3, SDCBP, SOX9                                                                                                                                                                                                   | GO:0007010 cytoskeleton organization                                                                                                                                                                                  |
| CEACAM1, GAB2, ITGA1, ITGB8; ADD3, LIMK1, MYADM, MRCL3(MYL12A), TRIO                                                                                                                                                                                                            | GO:0007229 integrin-mediated signaling pathway; GO:0005911 cell-cell junction; GO:0040011 locomotion; GO:0016477 cell migration                                                                                       |
| ANTXR1, ATP1B1, BVES, CALCA, CDH23, CEACAM1, CLSTN3, COL12A1, COMP, FBLIM1, KITLG, NCAM2, NEO1, PCDHB2/4/6/9-11/13/14, PPFIBP1, PSEN1, PVRL2, RET, RND3, SPP1, TGFB11, TPBG, TRO, VTN                                                                                           | GO:0007155 cell adhesion; GO:0007411 axon guidance                                                                                                                                                                    |
| HIF1A, HTR2B, KITLG, LEF1, RET, SOX8                                                                                                                                                                                                                                            | GO:0001755 neural crest cell migration                                                                                                                                                                                |
| EGR2/EGR3, ERBB2, SOX8                                                                                                                                                                                                                                                          | GO:0007422 peripheral nervous system development                                                                                                                                                                      |
| JARID1B, JARID2                                                                                                                                                                                                                                                                 | GO:0016568 chromatin modification; GO:0048863 stem cell differentiation                                                                                                                                               |
| SLIT2, SLITRK6, FLOT1                                                                                                                                                                                                                                                           | GO:0035385 Roundabout signaling pathway; GO:0050772 positive regulation of axonogenesis                                                                                                                               |
| EPHA2, EPHB3; SEMA6C, SEMA6D                                                                                                                                                                                                                                                    | GO:0048013 ephrin receptor signaling pathway; GO:0030215 semaphorin receptor binding; GO:0007411 axon guidance                                                                                                        |
| DCX, DPYSL3, ERBB2, KCNQ2, PSEN1, PTPRO, RRAS, SPTAN1, ST8SIA4; STMN2, TEAD2                                                                                                                                                                                                    | GO:0007411 axon guidance; GO:0030426 growth cone; GO:0048666 neuron development                                                                                                                                       |
| LAMB2, LAMC1                                                                                                                                                                                                                                                                    | GO:0005605 basal lamina; GO:0031175 neuron projection development                                                                                                                                                     |
| DLG2, GLS, GNG2/8, HCN1, KCNQ2, PANX, RRAS, SDCBP, SST, SYNJ2, SYT2; STX7, STXBP5/6                                                                                                                                                                                             | GO:0007268 synaptic transmission; GO:0019905 syntaxin binding; GO:0045202 synapse                                                                                                                                     |
| HTR2B, FOS, KALRN, NAB2, NAV2, DCX, RGS9, RTN4, VCL                                                                                                                                                                                                                             | GO:0007399 nervous system development; neurite branching; GO:0030334 regulation of cell migration                                                                                                                     |
| CDKL5                                                                                                                                                                                                                                                                           | GO:0001764 neuron migration; GO:0050773 regulation of dendrite development; GO:0051726 regulation of cell cycle                                                                                                       |
| BCL2, BOK, CASP4/9, CTSB, NLRP1, SKIL; ANGPT1, CPEB4, CRLF1, F2R, HIF1A, MDK, NTRK1, PSEN1                                                                                                                                                                                      | GO:0006915 apoptotic process; GO:0043524 negative regulation of neuron apoptotic process                                                                                                                              |
| ADAM12, ADAMTS9, MMP2/11                                                                                                                                                                                                                                                        | GO:0008237 metalloproteinase activity                                                                                                                                                                                 |
| F2R, GALR1, GPR161, HTR2B, IGF2R, P2RY2, PTGER2, PTGIR                                                                                                                                                                                                                          | GO:0004930 G-protein coupled receptor activity; GO:0004966 galanin receptor activity; GO:0007218 neuropeptide signaling pathway; GO:0007189 adenylate cyclase-activating G-protein coupled receptor signaling pathway |
| CRLF1                                                                                                                                                                                                                                                                           | GO:0005127 ciliary neurotrophic factor receptor binding                                                                                                                                                               |

## Supplementary Table 2

| <b>B INDUCED 12</b>                                                                                                                                                                             |                                                                                                                                                                                                                                                 |
|-------------------------------------------------------------------------------------------------------------------------------------------------------------------------------------------------|-------------------------------------------------------------------------------------------------------------------------------------------------------------------------------------------------------------------------------------------------|
| AEBP1, ARNT2/L2, CREB5, ETS1, ETV4, HIF3A, HOXB3, IRF7, KLF5, MAFF, MKL1, MSRB2, MYH9/15, NANOG, NFIB, NFIL3, RARB, REST, SALL4, SMAD1, SOX9/11, STAT6, TBX19, TSC22D3, ZFP36L1, ZNF219/226/641 | GO:0003700 sequence-specific DNA binding transcription factor activity; GO:0009790 embryo development                                                                                                                                           |
| APOE, GPC2, RDH12                                                                                                                                                                               | GO:0001523 retinoid metabolic process                                                                                                                                                                                                           |
| AMER3, DKK1/2, MDFI, NPHP3, SFRP1, SMO                                                                                                                                                          | GO:0017147 Wnt-protein binding; GO:0007224 smoothed signaling pathway; GO:0048663 neuron fate commitment; GO:0001755 neural crest cell migration                                                                                                |
| TUBA3C, TUBB2A/2B/3/4/6/8; DST, MAP1B, MAPT; KIF1B/13B/5A/5C                                                                                                                                    | GO:0007017 microtubule-based process; GO:0008017 microtubule binding; GO:0000226 microtubule cytoskeleton organization; GO:0005871 kinesin complex;                                                                                             |
| AMOTL2, DCHS1, TJP1/2, YAP1                                                                                                                                                                     | GO:0035329 hippo signalling; GO:0030054 cell junction; GO:0005516 calmodulin binding; GO:0005923 tight junction; cell migration GO:0022008 neurogenesis                                                                                         |
| RAB15/2B/38/3B/4B, RASGRP2, RHOC, SH2D3C; DIRAS3, ABR, ARHGAP26, ARL8A, DOCK6, GDI1, KNDC1, MCF2L, MRAS                                                                                         | GO:0007264 small GTPase mediated signal transduction                                                                                                                                                                                            |
| ADCYAP1, CAP2, EDNRA                                                                                                                                                                            | GO:0007190 activation of adenylate cyclase activity; GO:0007163 establishment or maintenance of cell polarity; GO:0007411 axon guidance                                                                                                         |
| EDNRA, GPR68/124/161, SSTR2, SUCNR1                                                                                                                                                             | GO:0086100 endothelin receptor signaling pathway; GO:0004930 G-protein coupled receptor activity;                                                                                                                                               |
| ACTB, ALCAM, ANK3, COL1A1/13A1/3A1/6A2, CORO2B, LSAMP, SPTBN1, SRC, TPM1/4                                                                                                                      | GO:0007010 cytoskeleton organization; GO:0030424 axon GO:0007411 axon guidance; GO:0010718 positive regulation of epithelial to mesenchymal transition; GO:0048706 embryonic skeletal system development; GO:0007399 nervous system development |
| CTNNA1, CD59, FN1, FBLIM1, PTPRK, PXN, BCAN                                                                                                                                                     | GO:0007155 cell adhesion; GO:0048870 cell motility; GO:0030198 extracellular matrix organization                                                                                                                                                |
| PLAU, PRSS3/12; SCG2/5                                                                                                                                                                          | GO:0004252 serine-type endopeptidase activity; GO:0014909 smooth muscle cell migration; GO:0043542 endothelial cell migration                                                                                                                   |
| SOCS2                                                                                                                                                                                           | growth hormone receptor signaling                                                                                                                                                                                                               |
| INHBA, DLX5, DPYSL4, ENC1, FEZ1, FGF13, GAL, IGSF8, JUP, LY6H, NES, NRG1, PTN, TAGLN2/3, TIMP1/2; GFRA1 PLK3                                                                                    | GO:0007399 nervous system development; GO:0035860 glial cell-derived neurotrophic factor receptor signaling GO:0007093 mitotic cell cycle checkpoint                                                                                            |
| SEMA4F; EFNA4; PLXNA2                                                                                                                                                                           | GO:0030215 semaphorin receptor binding; GO:0048013 ephrin receptor signaling pathway; GO:0021915 neural tube development; neurogenesis                                                                                                          |
| B3GALT2/4, B3GNT4/5                                                                                                                                                                             | GO:0008378 galactosyltransferase activity; GO:0006486 protein glycosylation                                                                                                                                                                     |
| ANXA2/3/6, CCDC80, CXADR, DCN, HOMER3, EGFLAM, LGALS1/3, LTBP1, MFGE8, MGP, MRC2, NID1, TGFB1, TGFB1; ITGA3/6/B1/B3                                                                             | GO:0005544 calcium-dependent phospholipid binding; GO:0030054 cell junction; GO:0007160 cell-matrix adhesion; GO:0031012 extracellular matrix; GO:0005178 integrin binding; GO:0005518 collagen binding; GO:0001649 osteoblast differentiation  |
| CHAC1, DTX1                                                                                                                                                                                     | GO:0005112 Notch binding; GO:0008593 regulation of Notch signaling pathway                                                                                                                                                                      |
| NRG1; NFIB                                                                                                                                                                                      | GO:0048011 neurotrophin TRK receptor signaling pathway; GO:0045595 regulation of cell differentiation; GO:0009790 embryo development; GO:0030154 cell differentiation                                                                           |
| ADAM19/22/23, ADAMTS5/10, MMP15, THSD4                                                                                                                                                          | GO:0004222 metalloendopeptidase activity; GO:0031012 extracellular matrix                                                                                                                                                                       |
| APOE, CASP3/5/CASP6, CYFIP2, LITAF, NISCH, SCOTIN (SHISA5), TRADD; IFI16, PHLDA3, PYCARD                                                                                                        | GO:1901214 regulation of neuron death; GO:0042981 regulation of apoptotic process; GO:0072332 intrinsic apoptotic signaling pathway by p53 class mediator                                                                                       |
| SYNGR1, SYT4/5/9/11                                                                                                                                                                             | GO:0008021 synaptic vesicle; GO:0043005 neuron projection; GO:0030425 dendrite; GO:0030426 growth cone                                                                                                                                          |
| FBXL2/7                                                                                                                                                                                         | GO:0004842 ubiquitin-protein transferase activity                                                                                                                                                                                               |
| ADCY5, ADCYAP1, AKAP6; CRH, GAL, VIP                                                                                                                                                            | GO:0008179 adenylate cyclase binding; GO:0005184 neuropeptide hormone activity;                                                                                                                                                                 |
| TTYH3                                                                                                                                                                                           | GO:1902476 chloride transmembrane transport                                                                                                                                                                                                     |
| NANOG, SMAD1, SOX9, SOX11                                                                                                                                                                       | GO:0019827 stem cell maintenance; GO:0009880 embryonic pattern specification; GO:0014032 neural crest cell development                                                                                                                          |
| DDR1, SSTR2                                                                                                                                                                                     | GO:0008285 negative regulation of cell proliferation                                                                                                                                                                                            |

### Supplementary Table 3

| C INDUCED_24                                   |                                                                                                                                                                                                                                                |
|------------------------------------------------|------------------------------------------------------------------------------------------------------------------------------------------------------------------------------------------------------------------------------------------------|
| DDIT3, MAFK, MYC, SMARCD3, RUNX1T1             | GO:0003700 sequence-specific DNA binding transcription factor activity; GO:0007399 nervous system development                                                                                                                                  |
| RAI14                                          | Retinoic Acid-Induced protein 14                                                                                                                                                                                                               |
| PHLDA2, PHLDB2                                 | GO:0030334 regulation of cell migration; GO:0045995 regulation of embryonic development                                                                                                                                                        |
| PRSS23                                         | GO:0008233 peptidase activity                                                                                                                                                                                                                  |
| ADORA2B, CHRM2/3, GPR64/124/126, NPY           | GO:0004930 G-protein coupled receptor activity; GO:0007188 adenylate cyclase-modulating G-protein coupled receptor signaling pathway; GO:0016907 G-protein coupled acetylcholine receptor activity; GO:0007218 neuropeptide signaling pathway; |
| MYLIP, SCRG1                                   | GO:0008092 cytoskeletal protein binding; GO:0007399 nervous system development                                                                                                                                                                 |
| MARCH2                                         | GO:0004842 ubiquitin-protein transferase activity;                                                                                                                                                                                             |
| PLAUR                                          | GO:0030377 urokinase plasminogen activator receptor activity; GO:0005925 focal adhesion                                                                                                                                                        |
| GPC1/5                                         | GO:0001523 retinoid metabolic process; GO:0014037 Schwann cell differentiation;                                                                                                                                                                |
| PARG, SPATA18                                  | GO:0006974 cellular response to DNA damage stimulus                                                                                                                                                                                            |
| NCSTN                                          | GO:0007219 Notch signaling pathway; GO:0007220 Notch receptor processing                                                                                                                                                                       |
| EFNB2                                          | GO:0048013 ephrin receptor signaling pathway; GO:0007411 axon guidance                                                                                                                                                                         |
| CDKN2D; LATS2                                  | GO:0000082 G1/S transition of mitotic cell cycle; GO:0035329 hippo signaling                                                                                                                                                                   |
| NEFL, MAP6, MICALL2, PLCE1, SH3D19, TCHH, WIP1 | GO:0005883 neurofilament; GO:0007010 cytoskeleton organization                                                                                                                                                                                 |
| NRBP2                                          | GO:0030182 neuron differentiation; GO:0030154 cell differentiation                                                                                                                                                                             |
| FZD5, GRK5, SOSTDC1                            | GO:0016055 Wnt signaling pathway                                                                                                                                                                                                               |
| DDIT3                                          | GO:0090090 negative regulation of canonical Wnt signaling pathway                                                                                                                                                                              |
| BCAS3                                          | GO:0035035 histone acetyltransferase binding; GO:0003682 chromatin binding; GO:0042393 histone binding                                                                                                                                         |
| ENO2                                           | GO:0043025 neuronal cell body                                                                                                                                                                                                                  |
| SYNGR2, SYT17                                  | GO:0008021 synaptic vesicle;                                                                                                                                                                                                                   |
| NANOS3                                         | GO:0051726 regulation of cell cycle; GO:2001234 negative regulation of apoptotic signaling pathway; GO:0007275 multicellular organismal development                                                                                            |
| CXCR4                                          | GO:0061351 neural precursor cell proliferation; GO:0001764 neuron migration; GO:0070098 chemokine-mediated signaling pathway; GO:0030334 regulation of cell migration; GO:0043217 myelin maintenance                                           |
| BMX, CDH6, CTNND2, DCBLD2, THBS2               | GO:0007155 cell adhesion                                                                                                                                                                                                                       |
| ASNS, CYR61, GRK5, TXNDC5                      | GO:0043066 negative regulation of apoptotic process                                                                                                                                                                                            |
| PHACTR3, TAGLN2                                | GO:0003779 actin binding                                                                                                                                                                                                                       |
| NPPC                                           | GO:0003418 growth plate cartilage chondrocyte differentiation                                                                                                                                                                                  |
| FSTL3                                          | GO:0001503 ossification; GO:0002244 hematopoietic progenitor cell differentiation                                                                                                                                                              |

**Supplementary Table 4**

| <b>D INDUCED LATE</b>                   |                                                                                                                                                                          |
|-----------------------------------------|--------------------------------------------------------------------------------------------------------------------------------------------------------------------------|
| CEBPD, CUTL2, ELF5, FLI1, HOXB2         | GO:0001071 nucleic acid binding transcription factor activity; transcription factor activity                                                                             |
| BMP6                                    | GO:0030509 BMP signaling pathway; GO:0030154 cell differentiation; GO:0045666 positive regulation of neuron differentiation                                              |
| BMP6, MEST; CRABP1                      | GO:0032526 response to retinoic acid; GO:0001972 retinoic acid binding                                                                                                   |
| HHIP                                    | GO:0097108 hedgehog family protein binding; GO:0045879 negative regulation of smoothened signaling pathway; GO:0007405 neuroblast proliferation                          |
|                                         | GO:0048706 embryonic skeletal system development                                                                                                                         |
| LGII, MYL6/7, OPHN1, EFHC1, SNCAIP      | GO:0016459 myosin complex; GO:0007519 skeletal muscle tissue development; GO:0007411 axon guidance; GO:0043025 neuronal cell body; GO:0007399 nervous system development |
| SEMA3C                                  | GO:0030215 semaphorin receptor binding; GO:0021915 neural tube development; GO:0001755 neural crest cell migration                                                       |
| MFAP4                                   | GO:0030198 extracellular matrix organization                                                                                                                             |
| ACTA2, ACTG2                            | GO:0015629 actin cytoskeleton                                                                                                                                            |
| CTGF                                    | GO:0032330 regulation of chondrocyte differentiation                                                                                                                     |
| ITGA7                                   | GO:0005178 integrin binding; GO:0030198 extracellular matrix organization; GO:0016477 cell migration; GO:0030154 cell differentiation                                    |
| NOTCH2                                  | GO:0007219 Notch signaling pathway; GO:0030154 cell differentiation;                                                                                                     |
| CTNNBIP1, SFRP1, WISP1, WNT11           | GO:0016055 Wnt signaling pathway; GO:0030877 beta-catenin destruction complex                                                                                            |
| NDRG1 (N-Myc Downstream Regulated 1)    | GO:0015630 microtubule cytoskeleton; GO:0032287 peripheral nervous system myelin maintenance; GO:0030330 DNA damage response, signal transduction by p53 class mediator  |
| LATS2 (Large Tumor Suppressor Kinase 2) | GO:0035329 hippo signalling; GO:0046620 regulation of organ growth                                                                                                       |
| THBS1                                   | GO:0007155 cell adhesion; GO:0001968 fibronectin binding; GO:0030198 extracellular matrix organization; GO:0007050 cell cycle arrest;                                    |
| CYR61                                   | cell adhesion, proliferation, differentiation, angiogenesis, apoptosis, GO:0031012 extracellular matrix                                                                  |
| IL33, CD274, GBP2/3                     | GO:0006955 immune response                                                                                                                                               |
| CXCL12                                  | GO:0070098 chemokine-mediated signaling pathway; GO:0001764 neuron migration                                                                                             |
| ASPN                                    | GO:0030512 negative regulation of transforming growth factor beta receptor signalling pathway                                                                            |
| ANXA1, BMP6, PTX3, TGFB2                | GO:0006954 inflammatory response; GO:0030154 cell differentiation                                                                                                        |
| GAS2                                    | GO:0006915 apoptotic process; GO:0007050 cell cycle arrest; GO:0008360 regulation of cell shape                                                                          |
| SPARC                                   | GO:0001503 ossification; GO:0071363 cellular response to growth factor stimulus; GO:0022604 regulation of cell morphogenesis                                             |
| CRYM                                    | GO:0070324 thyroid hormone binding; GO:0050877 neurological system process                                                                                               |
| MC4R                                    | GO:0004977 melanocortin receptor activity; GO:0004980 melanocyte-stimulating hormone receptor activity                                                                   |
| ITIH3                                   | GO:0004866 endopeptidase inhibitor activity; GO:0030212 hyaluronan metabolic process                                                                                     |
| HTRA1                                   | GO:0001558 regulation of cell growth                                                                                                                                     |
| SDK2                                    | GO:0007155 cell adhesion                                                                                                                                                 |

Text

## Supplementary Table 5

| E REPRESSED                                                                                                                                                                                                                                                                                                                             |                                                                                                                                                                                                                                                                                                                                                                                    |
|-----------------------------------------------------------------------------------------------------------------------------------------------------------------------------------------------------------------------------------------------------------------------------------------------------------------------------------------|------------------------------------------------------------------------------------------------------------------------------------------------------------------------------------------------------------------------------------------------------------------------------------------------------------------------------------------------------------------------------------|
| E2F2, EBF3, FOXN4, GATA3/4, HAND1, INSM1, KLF9/15, LZTS1, MSX2, MXD4, NFIX, ONECUT2, PA2G4, PCGF6, POU3F2, PROX1, PTTG1, RFXAP, RXRA, SCML1, SHOX2, SIX3, SNAI1, SOX2/7, TAF3/4B/5, TEF, TFAM, TLE1/2, TRERF1, VDR, ZBTB25, ZFPM2, ZNF287                                                                                               | GO:0001071 nucleic acid binding transcription factor activity; GO:0000122 negative regulation of transcription from RNA polymerase II promoter; GO:0030154 cell differentiation; GO:0001701 in utero embryonic development; GO:0048935 peripheral nervous system neuron development; GO:0030182 neuron differentiation                                                             |
| CCNC, DLK1, DLL1, HDAC9, LFNG, TLE1/2<br>KREMEN2, SIX3, SOX2, TLE1                                                                                                                                                                                                                                                                      | GO:0007219 Notch signaling pathway;<br>GO:0030178 negative regulation of Wnt signaling pathway;<br>GO:0043124 negative regulation of I-kappaB kinase/NF-kappaB signalling;                                                                                                                                                                                                         |
| FGFR2, HDAC9, MXD4, NFIX, PER2, RFC1                                                                                                                                                                                                                                                                                                    | GO:0042127 regulation of cell proliferation;                                                                                                                                                                                                                                                                                                                                       |
| ASPM, CAMK4, CAMKK1, CAMKV, PCNT, RYR2<br>NRP1/2                                                                                                                                                                                                                                                                                        | GO:0005516 calmodulin binding;<br>GO:1901166 neural crest cell migration involved in autonomic nervous system development;                                                                                                                                                                                                                                                         |
| EFNA1, NRP1/2, NPPA, PLXND1, GFRA3, MGLL, NDRG1, PSD3, PVRL1, SEMA3A/6A, SPTB<br>BCL2L11, ECT2, FGF5, FGFR2, ITSN1<br>RXRA                                                                                                                                                                                                              | GO:0046875 ephrin receptor binding; GO:0071526 semaphorin-plexin signaling pathway;<br>neurotrophin TRK receptor signaling<br>GO:0048384 retinoic acid receptor signaling pathway;                                                                                                                                                                                                 |
| RALBP1, ECT2; DUSP5P(RHOU)<br>MSX2, RYR2                                                                                                                                                                                                                                                                                                | GO:0043089 positive regulation of Cdc42 GTPase activity<br>GO:0030509 BMP signaling pathway                                                                                                                                                                                                                                                                                        |
| ACE, ARHGAP22, BCCIP, CDON, CENPF, FABP5, FGFR2, HDAC9, HRH3, INSM1/2, KAZALD1, LYN, MICALCL, NELL1, NLGN1, PEG10, PER2, PSD3, RPS3A, RSL1D1, SYNCRIP, TPD52, UNC45B, USP13<br>BCL2L11, BCL11B, BFAR, BIRC5, CLN3, ECT2, HSPD1, ING5, ITSN1, MSX2, NRP1, PRKDC, SET, STEAP3, UNC5A; CROP, FGFR2, FKG2, PEG10, PIM1, PSMB9, TOX3<br>SIX3 | GO:0030154 cell differentiation; GO:0061101 neuroendocrine cell differentiation; GO:2000179 positive regulation of neural precursor cell proliferation;<br>GO:0006915 apoptotic process; GO:0043066 negative regulation of apoptotic process; GO:0043524 negative regulation of neuron apoptotic process<br>GO:0014016 neuroblast differentiation; GO:0097402 neuroblast migration |
| ASPM, DLL1, PROX1, SOX2<br>FAM60A, PTPRU                                                                                                                                                                                                                                                                                                | GO:0097150 neuronal stem cell maintenance<br>GO:0030336 negative regulation of cell migration;                                                                                                                                                                                                                                                                                     |
| ALK, DSCAML1, FGF5, GFRA3, MTR, NELL1, NLGN1, NRN1, PCDH1, SHOX2, SLITRK1<br>WWC2                                                                                                                                                                                                                                                       | nervous system development<br>GO:0035331 negative regulation of hippo signalling                                                                                                                                                                                                                                                                                                   |
| AKT3, ARVCF, CDH4/7/18/22, CDON, CLDN11, DSCAML1, ICAM4, IGFBP7, KIF14, NLGN1, NRCAM, NRP1/2, PCDH1/9/17, PKD1L1, PTPRT, PTPRU, PVRL1, SIRPA, SNAI1, SORBS2                                                                                                                                                                             | GO:0007155 cell adhesion; GO:0007158 neuron cell-cell adhesion; GO:0016477 cell migration                                                                                                                                                                                                                                                                                          |
| ASPM, GATA3, GFRA3, NRCAM, NRP1/2, PCNT, SEMA3A/6A                                                                                                                                                                                                                                                                                      | GO:0001764 neuron migration;                                                                                                                                                                                                                                                                                                                                                       |
| ADM, BIRC5, CXCL5, FGF5, FGFR1OP, FGFR2, LIFR, LYN, NAP1L1, PHIP, POU3F2, PROX1, RPS15A, TBC1D8, TPD52<br>RAB37/39                                                                                                                                                                                                                      | GO:0008284 positive regulation of cell proliferation;<br>GO:0007264 small GTPase mediated signal transduction                                                                                                                                                                                                                                                                      |
| AGTR1, DBH, FGFR2, RPA3, SIX3<br>SMOC2, SPOCK3                                                                                                                                                                                                                                                                                          | GO:0042127 regulation of cell proliferation<br>GO:0005539 glycosaminoglycan binding; GO:0005509 calcium ion binding; metalloendopeptidase inhibitor;                                                                                                                                                                                                                               |
| AGTR1, IGFBP4/7, IGFBPL1, KAZALD1; FBP1, NPPA, RERG, ZC3H12D<br>CHGA                                                                                                                                                                                                                                                                    | GO:0001558 regulation of cell growth; GO:0030308 negative regulation of cell growth<br>neuroendocrine activity                                                                                                                                                                                                                                                                     |
| AGTR1, CACNA2D2, CACNG4, NUDT4, PKD1L1, RYR2, TRPM7, TPCN1<br>CABC1(ADCK3)                                                                                                                                                                                                                                                              | GO:0005245 voltage-gated calcium channel activity;<br>GO:0019722 calcium-mediated signaling<br>suppresses p53-induced apoptosis                                                                                                                                                                                                                                                    |
| NXPH1                                                                                                                                                                                                                                                                                                                                   | promote adhesion between dendrites and axons                                                                                                                                                                                                                                                                                                                                       |
| ABCA12, ABCB10, ABCC9, CACNG4, CAMK4, CAMKK1, CYB561, CYGB, DBH, EDG7, GABRB1, GRIA4, GRID1, GRIK3, HTR3A, KCNC1/G1/J12, PDE7B, SLC1A3, SLITRK1/5<br>COLEC12, CXCL5, DEFEB1, HAMP, IKBKE, PVRL1, SECTM1<br>HIST1H4B/4D/4L                                                                                                               | GO:0007268 synaptic transmission; GO:0035249 synaptic transmission, glutamatergic; GO:0007267 cell-cell signalling; GO:0022857 transmembrane transporter activity; GO:0005249 voltage-gated potassium channel activity<br>GO:0006935 chemotaxis; GO:0005125 cytokine activity<br>GO:0035575 histone demethylase activity; GO:0000723 telomere maintenance                          |

## Supplementary Table 6

| F REPRESSED_CYCLIC                                                                                                                                                                                                                                                                                                                                                                                                                                                           |                                                                                                                                                                                                                                                                                                                                                                          |
|------------------------------------------------------------------------------------------------------------------------------------------------------------------------------------------------------------------------------------------------------------------------------------------------------------------------------------------------------------------------------------------------------------------------------------------------------------------------------|--------------------------------------------------------------------------------------------------------------------------------------------------------------------------------------------------------------------------------------------------------------------------------------------------------------------------------------------------------------------------|
| E2F1, E2F2, E2F7, E2F8, MYBL2, LMO1, PSMC3IP, SOX7, TCF7/19, TFDPI/3, UHRF1                                                                                                                                                                                                                                                                                                                                                                                                  | GO:0001071 nucleic acid binding transcription factor activity; GO:0005667 transcription factor complex; GO:0051726 regulation of cell cycle;                                                                                                                                                                                                                             |
| MYCNOS                                                                                                                                                                                                                                                                                                                                                                                                                                                                       | MYCN opposite strand; neuroblastoma derived                                                                                                                                                                                                                                                                                                                              |
| ATAD2, AURKA/B, BIRC5, BUB1B, CABLES1, CASC5, CDC2/6/25A/C, CDCA2/4/5/7/8, CCNA2/E2, CDT1, CENPF/M/O/P/Q, CEP152, CHAF1A/B, CHTF18, CKS1B, DBF4, DHFR, DSN1, ESCO2, ESPL1, EXO1, FEN1, GINS1/2, GMNN, H2AFX, ITGB3BP, JAG2, KIF2C, KNTC1, MAD2L1, MASTL, MCM2/3/4/10, MLF1IP(CENPU), MND1, NASP, NCAPD2/3/G/G2/H, NUF2, NUP210, PCNA, PKMYT1, PLK1/4, POLA2/D1/D3/E/E2, PRIM1, ORC1L/6L, RBL1, RFC2/3/5, RPA1/3, RRM1/2, SAC3D1, SKP2, SMC2, TIPIN, TYMS, VRK1, XRCC2, ZWINT | GO:0007049 cell cycle; GO:0000082 G1/S transition of mitotic cell cycle; GO:0000086 G2/M transition of mitotic cell cycle; GO:0007093 mitotic cell cycle checkpoint; GO:0006260 DNA replication; GO:0007059 chromosome segregation; GO:0051297 centrosome organization; GO:0051225 spindle assembly; spindle pole; GO:0015630 microtubule cytoskeleton; histone binding; |
| BARD1, BLM, BRCA1/2, DDX11, DKC1, DTL, FANCA/D2/E/G, MRE11A, NEIL3, NTHL1, RAD9A /51/54B, TICRR, TOPBP1, TERT, TREX1, UNG, USP1, XRCC2                                                                                                                                                                                                                                                                                                                                       | GO:0006259 DNA metabolic process; G2 DNA damage checkpoint; GO:0006281 DNA repair; GO:0000723 telomere maintenance; GO:0043240 Fanconi anaemia nuclear complex                                                                                                                                                                                                           |
| HELLS                                                                                                                                                                                                                                                                                                                                                                                                                                                                        | GO:0008283 cell proliferation; GO:0006342 chromatin silencing; GO:0006306 DNA methylation; GO:0043066 negative regulation of apoptotic process                                                                                                                                                                                                                           |
| EXOSC2/5, GEMIN4, NOLC1, SUV39H1                                                                                                                                                                                                                                                                                                                                                                                                                                             | GO:0006364 rRNA processing;                                                                                                                                                                                                                                                                                                                                              |
| CNTNAP2                                                                                                                                                                                                                                                                                                                                                                                                                                                                      | GO:0007155 cell adhesion; GO:0008038 neuron recognition; GO:0050877 neurological system process                                                                                                                                                                                                                                                                          |
| KCNH4, KCNH6; PCSK1                                                                                                                                                                                                                                                                                                                                                                                                                                                          | GO:0005249 voltage-gated potassium channel activity; GO:0007268 synaptic transmission                                                                                                                                                                                                                                                                                    |
| ABCB10, CPNE7, FABP5, SCARB1                                                                                                                                                                                                                                                                                                                                                                                                                                                 | GO:0005215 transporter activity                                                                                                                                                                                                                                                                                                                                          |
| PRPS2                                                                                                                                                                                                                                                                                                                                                                                                                                                                        | nucleotide biosynthetic process                                                                                                                                                                                                                                                                                                                                          |
| IRX5/6                                                                                                                                                                                                                                                                                                                                                                                                                                                                       | GO:0050877 neurological system process; GO:0048856 anatomical structure development                                                                                                                                                                                                                                                                                      |
| ENDOG, ICMT, JAG2, POLE, RNASEH2B, RPA1, XRCC2                                                                                                                                                                                                                                                                                                                                                                                                                               | GO:0001701 in utero embryonic development; GO:0043065 positive regulation of apoptotic process                                                                                                                                                                                                                                                                           |
| CIT                                                                                                                                                                                                                                                                                                                                                                                                                                                                          | GO:0000910 cytokinesis; GO:0048699 generation of neurons; GO:0043025 neuronal cell body;                                                                                                                                                                                                                                                                                 |
| GART, ICMT, METTL1, PRMT3, SUV39H1, TYMS, WDR4                                                                                                                                                                                                                                                                                                                                                                                                                               | GO:0008168 methyltransferase activity                                                                                                                                                                                                                                                                                                                                    |
| PPIF                                                                                                                                                                                                                                                                                                                                                                                                                                                                         | GO:0042981 regulation of apoptotic process                                                                                                                                                                                                                                                                                                                               |
| DGAT2                                                                                                                                                                                                                                                                                                                                                                                                                                                                        | GO:0042572 retinol metabolic process; GO:0001523 retinoid metabolic process                                                                                                                                                                                                                                                                                              |
| SDC1                                                                                                                                                                                                                                                                                                                                                                                                                                                                         | GO:0060070 canonical Wnt signaling pathway                                                                                                                                                                                                                                                                                                                               |
| MYOHD1                                                                                                                                                                                                                                                                                                                                                                                                                                                                       | GO:0016459 myosin complex; GO:0005741 mitochondrial outer membrane                                                                                                                                                                                                                                                                                                       |
| ABCB10, ATAD3A, HADH, MTP18, PPIF, SFXN2, SLC25A10, TYMS                                                                                                                                                                                                                                                                                                                                                                                                                     | GO:0005743 mitochondrial inner membrane;                                                                                                                                                                                                                                                                                                                                 |
| MGME1                                                                                                                                                                                                                                                                                                                                                                                                                                                                        | GO:0000002 mitochondrial genome maintenance; GO:0043504 mitochondrial DNA repair                                                                                                                                                                                                                                                                                         |
| CAD, TK1, TYMS                                                                                                                                                                                                                                                                                                                                                                                                                                                               | GO:0046134 pyrimidine nucleoside biosynthetic process; GO:0006206 pyrimidine nucleobase metabolic process                                                                                                                                                                                                                                                                |

Text

## Supplementary Table 7

| G SPIKED              |                                                                                                                                                                  |
|-----------------------|------------------------------------------------------------------------------------------------------------------------------------------------------------------|
| KLF10, ZNF37A         | GO:0001071 nucleic acid binding transcription factor activity                                                                                                    |
| CMKLR1, P2RY6, RGS16  | GO:0004930 G-protein coupled receptor activity;<br>GO:0007186 G-protein coupled receptor signaling pathway                                                       |
| PIK3R1                | GO:0048015 phosphatidylinositol-mediated signalling;<br>GO:0008286 insulin receptor signaling pathway;<br>GO:0048011 neurotrophin TRK receptor signaling pathway |
| IGF2                  | GO:0008083 growth factor activity; GO:0008286 insulin receptor signaling pathway                                                                                 |
| GHR                   | GO:0004903 growth hormone receptor activity;<br>GO:0060396 growth hormone receptor signaling pathway                                                             |
| RAC2                  | GO:0007264 small GTPase mediated signal transduction;                                                                                                            |
| BTG2                  | GO:2000178 negative regulation of neural precursor cell proliferation; GO:0030182 neuron differentiation                                                         |
| CDKN1A                | GO:0008285 negative regulation of cell proliferation                                                                                                             |
| S100B                 | GO:0007409 axonogenesis; GO:0005509 calcium ion binding; GO:0050877 neurological system process                                                                  |
| TSPYL2                | GO:0045786 negative regulation of cell cycle; GO:0016568 chromatin modification                                                                                  |
| WNT6                  | GO:0016055 Wnt signaling pathway                                                                                                                                 |
| CD52, CD177           | GO:0005887 integral component of plasma membrane;<br>GO:0002376 immune system process                                                                            |
| IGHA2, IGHM           | GO:0003823 antigen binding; GO:0006955 immune response                                                                                                           |
| TEX101                | GO:0031225 anchored component of membrane                                                                                                                        |
| IL2RB, IL10RB         | GO:0004911 interleukin-2 receptor activity;<br>GO:0019221 cytokine-mediated signaling pathway                                                                    |
| AQP6                  | GO:0055085 transmembrane transport;                                                                                                                              |
| TTC7A, TTC30A, TTC30B | GO:0042073 intraciliary transport                                                                                                                                |
| DDIT4L                | GO:0009968 negative regulation of signal transduction                                                                                                            |
| ANGPT2                | GO:0001525 angiogenesis                                                                                                                                          |
| HSD17B1               | GO:0006694 steroid biosynthetic process                                                                                                                          |
| BTBD9                 | GO:0042428 serotonin metabolic process                                                                                                                           |
| PIP5K2A               | GO:0016740 transferase activity; GO:0006650 glycerophospholipid metabolic process                                                                                |
| NID2                  | GO:0030198 extracellular matrix organization;                                                                                                                    |
| TPCN2                 | GO:0005245 voltage-gated calcium channel activity;<br>GO:0005216 ion channel activity                                                                            |
| PSCD4                 | GO:0032012 regulation of ARF protein signal transduction                                                                                                         |

## Supplementary Table 8

| H CLEFT                                              |                                                                                                                                                                                                                                                                           |
|------------------------------------------------------|---------------------------------------------------------------------------------------------------------------------------------------------------------------------------------------------------------------------------------------------------------------------------|
| ASCL1, ATF5, CEBPA, CITED4, FOSL2, HDAC5, HES6, JDP2 | GO:0003700 sequence-specific DNA binding transcription factor activity; GO:0008134 transcription factor binding                                                                                                                                                           |
| GPR56/155                                            | GO:0004930 G-protein coupled receptor activity; GO:0007218 neuropeptide signaling pathway; GO:0021801 cerebral cortex radial glia guided migration; GO:0035025 positive regulation of Rho protein signal transduction; GO:2001223 negative regulation of neuron migration |
| NANOS1                                               | GO:0017148 negative regulation of translation; GO:0010631 epithelial cell migration                                                                                                                                                                                       |
| NOS1AP                                               | GO:0050999 regulation of nitric-oxide synthase activity; nNOS signaling at neuronal synapses; neurotransmission; neurotoxicity; GO:0042981 regulation of apoptotic process                                                                                                |
| MICAL2                                               | GO:0030042 actin filament depolymerization;                                                                                                                                                                                                                               |
| ASCL1                                                | GO:0048663 neuron fate commitment; GO:0050769 positive regulation of neurogenesis; GO:0030182 neuron differentiation; GO:0048485 sympathetic nervous system development; neural crest differentiation; GO:0008593 regulation of Notch signaling pathway                   |
| SEMA3D                                               | GO:0007399 nervous system development                                                                                                                                                                                                                                     |
| PARD6A                                               | GO:0017048 Rho GTPase binding; GO:0045216 cell-cell junction organization; cell polarization; GO:0001837 epithelial-to-mesenchymal transition (EMT)                                                                                                                       |
| CD9, COL5A1/18A1, LAYN, PODXL                        | GO:0001726 ruffle; GO:0007155 cell adhesion; GO:0005925 focal adhesion; GO:0048870 cell motility; GO:0016477 cell migration                                                                                                                                               |
| TG                                                   | GO:0006590 thyroid hormone generation; GO:0031641 regulation of myelination                                                                                                                                                                                               |
| FBN1                                                 | GO:0001501 skeletal system development; GO:0035582 sequestering of BMP in extracellular matrix; GO:0035583 sequestering of TGFbeta in extracellular matrix                                                                                                                |
| CXCR7(ACKR3)                                         | GO:0007186 G-protein coupled receptor activity; GO:0006935 chemotaxis                                                                                                                                                                                                     |
| NRG1                                                 | GO:0048663 neuron fate commitment; GO:0014032 neural crest cell development; GO:0007399 nervous system development; GO:0009790 embryo development; GO:0007416 synapse assembly; GO:0031594 neuromuscular junction                                                         |
| AGRIN                                                | GO:0045213 neurotransmitter receptor metabolic process; GO:0050808 synapse organization;                                                                                                                                                                                  |
| IGFBP5                                               | GO:0031994 insulin-like growth factor I binding                                                                                                                                                                                                                           |
| BBC3, GADD45B/G, HRK, PPP2R2B, TNFRSF19              | GO:0006915 apoptotic process; GO:0043065 positive regulation of apoptotic process; GO:0097193 intrinsic apoptotic signaling pathway; GO:0043525 positive regulation of neuron apoptotic process                                                                           |
| IL17D                                                | GO:0005125 cytokine activity; GO:0006954 inflammatory response                                                                                                                                                                                                            |
| LGR5, NEFL, ISG15/20                                 | G-protein coupled receptor signaling                                                                                                                                                                                                                                      |
| DTNBP1, KIF1A, NEFL, SNAP25                          | GO:0043005 neuron projection                                                                                                                                                                                                                                              |
| DKK3                                                 | GO:0016055 Wnt signaling pathway;                                                                                                                                                                                                                                         |
| NEFL                                                 | GO:0005883 neurofilament; GO:0050772 positive regulation of axonogenesis                                                                                                                                                                                                  |
| ADRA2A, DTNBP1, MICAL2, NEFL                         | GO:0007010 cytoskeleton organization                                                                                                                                                                                                                                      |
| MATN2                                                | GO:0007411 axon guidance; GO:0031175 neuron projection development; GO:0008347 glial cell migration                                                                                                                                                                       |
| GNAZ                                                 | GO:0007193 adenylate cyclase-inhibiting G-protein coupled receptor signaling pathway; GO:0003924 GTPase activity                                                                                                                                                          |
| ARG2                                                 | GO:0006809 nitric oxide biosynthetic process; GO:0006525 arginine metabolic process; GO:0005759 mitochondrial matrix                                                                                                                                                      |
